# Supplementary material for: Analogies between binuclear phospholyl and cyclopentadienyl manganese carbonyl complexes: seven-electron donor bridging phospholyl rings
Source: Royal Society of Chemistry journal article supplement (doi:10.1039/c0nj00470g), 2011-01-01
Supplement: c0nj00470g.pdf [file c0nj00470g.pdf]

# Analogies between Binuclear PhospholyI and Cyclopentadienyl Manganese Carbonyl Complexes: Seven-Electron Donor Bridging PhospholyI Rings

Xiaohong Chen,<sup>a</sup> Quan Du,<sup>a</sup> Rong Jin,<sup>a</sup> Hao Feng,<sup>a\*</sup> Yaoming Xie,<sup>b</sup>  
and R. Bruce King<sup>b</sup>

<sup>a</sup>*School of Physics and Chemistry, Research Center for Advanced Computation,  
Xihua University, Chengdu, .China 610039*

<sup>b</sup>*Department of Chemistry and Center for Computational Chemistry  
University of Georgia, Athens, Georgia 30602, USA*

## Supporting Information

**Table S1-S5.** Harmonic vibrational frequencies (in  $\text{cm}^{-1}$ ) and infrared intensities (in parentheses, in  $\text{km/mol}$ ) for the structures of  $(\text{C}_4\text{H}_4\text{P})_2\text{Mn}_2(\text{CO})_5$ .

**Table S6-S12.** Harmonic vibrational frequencies (in  $\text{cm}^{-1}$ ) and infrared intensities (in parentheses, in  $\text{km/mol}$ ) for the structures of  $(\text{C}_4\text{H}_4\text{P})_2\text{Mn}_2(\text{CO})_4$ .

**Table S13-S19.** Harmonic vibrational frequencies (in  $\text{cm}^{-1}$ ) and infrared intensities (in parentheses, in  $\text{km/mol}$ ) for the structures of  $(\text{C}_4\text{H}_4\text{P})_2\text{Mn}_2(\text{CO})_3$ .

**Table S20-S24.** Harmonic vibrational frequencies (in  $\text{cm}^{-1}$ ) and infrared intensities (in parentheses, in  $\text{km/mol}$ ) for the structures of  $(\text{C}_4\text{H}_4\text{P})_2\text{Mn}_2(\text{CO})_2$ .

**Table S25.** Cartesian coordinates for the 24 structures discussed in this paper.

Table S1. Harmonic vibrational frequencies (in  $\text{cm}^{-1}$ ) and infrared intensities (in parentheses, in  $\text{km/mol}$ ) for the structure 5s-1 of  $(\text{C}_4\text{H}_4\text{P})_2\text{Mn}_2(\text{CO})_5$  with  $\text{C}_1$  symmetry.

| B3LYP |     |       | BP86 |     |       |
|-------|-----|-------|------|-----|-------|
| a     | 9   | (0)   | a    | 12  | (0)   |
|       | 19  | (1)   |      | 23  | (1)   |
|       | 32  | (1)   |      | 32  | (1)   |
|       | 38  | (0)   |      | 42  | (1)   |
|       | 63  | (0)   |      | 64  | (0)   |
|       | 78  | (0)   |      | 77  | (0)   |
|       | 86  | (0)   |      | 84  | (0)   |
|       | 89  | (0)   |      | 87  | (0)   |
|       | 97  | (0)   |      | 95  | (0)   |
|       | 102 | (1)   |      | 101 | (0)   |
|       | 109 | (0)   |      | 107 | (0)   |
|       | 117 | (0)   |      | 116 | (0)   |
|       | 124 | (0)   |      | 122 | (0)   |
|       | 173 | (0)   |      | 174 | (1)   |
|       | 184 | (1)   |      | 187 | (1)   |
|       | 204 | (1)   |      | 216 | (1)   |
|       | 276 | (16)  |      | 281 | (31)  |
|       | 282 | (1)   |      | 290 | (3)   |
|       | 303 | (6)   |      | 315 | (5)   |
|       | 303 | (8)   |      | 318 | (12)  |
|       | 328 | (12)  |      | 340 | (7)   |
|       | 361 | (12)  |      | 375 | (11)  |
|       | 406 | (0)   |      | 407 | (1)   |
|       | 441 | (1)   |      | 427 | (3)   |
|       | 457 | (1)   |      | 446 | (1)   |
|       | 465 | (1)   |      | 463 | (2)   |
|       | 479 | (2)   |      | 482 | (8)   |
|       | 481 | (0)   |      | 487 | (2)   |
|       | 491 | (1)   |      | 509 | (1)   |
|       | 512 | (23)  |      | 520 | (2)   |
|       | 527 | (3)   |      | 528 | (17)  |
|       | 534 | (30)  |      | 537 | (19)  |
|       | 542 | (31)  |      | 545 | (10)  |
|       | 569 | (40)  |      | 547 | (1)   |
|       | 570 | (14)  |      | 555 | (4)   |
|       | 578 | (2)   |      | 572 | (7)   |
|       | 594 | (9)   |      | 591 | (42)  |
|       | 611 | (30)  |      | 605 | (2)   |
|       | 625 | (79)  |      | 620 | (154) |
|       | 637 | (108) |      | 632 | (85)  |
|       | 643 | (84)  |      | 643 | (71)  |
|       | 654 | (64)  |      | 647 | (62)  |
|       | 677 | (110) |      | 673 | (97)  |
|       | 706 | (3)   |      | 687 | (5)   |
|       | 721 | (3)   |      | 697 | (4)   |
|       | 814 | (12)  |      | 790 | (8)   |

|      |        |      |        |
|------|--------|------|--------|
| 823  | (20)   | 794  | (17)   |
| 842  | (11)   | 808  | (9)    |
| 846  | (35)   | 817  | (3)    |
| 847  | (3)    | 824  | (32)   |
| 854  | (15)   | 826  | (11)   |
| 855  | (4)    | 830  | (9)    |
| 879  | (4)    | 848  | (4)    |
| 913  | (2)    | 867  | (3)    |
| 926  | (2)    | 885  | (3)    |
| 940  | (1)    | 899  | (1)    |
| 946  | (1)    | 901  | (1)    |
| 1042 | (6)    | 1012 | (6)    |
| 1044 | (3)    | 1016 | (3)    |
| 1070 | (8)    | 1033 | (8)    |
| 1078 | (3)    | 1043 | (2)    |
| 1090 | (4)    | 1055 | (3)    |
| 1090 | (1)    | 1055 | (1)    |
| 1264 | (2)    | 1212 | (2)    |
| 1265 | (5)    | 1213 | (6)    |
| 1340 | (17)   | 1294 | (21)   |
| 1352 | (4)    | 1306 | (6)    |
| 1426 | (0)    | 1382 | (2)    |
| 1427 | (1)    | 1384 | (1)    |
| 1445 | (1)    | 1393 | (1)    |
| 1448 | (0)    | 1394 | (0)    |
| 2001 | (642)  | 1926 | (493)  |
| 2030 | (811)  | 1946 | (775)  |
| 2033 | (843)  | 1950 | (692)  |
| 2043 | (1324) | 1965 | (1147) |
| 2089 | (817)  | 2006 | (661)  |
| 3216 | (0)    | 3144 | (0)    |
| 3222 | (0)    | 3148 | (0)    |
| 3223 | (0)    | 3150 | (1)    |
| 3232 | (0)    | 3157 | (1)    |
| 3232 | (2)    | 3159 | (0)    |
| 3239 | (1)    | 3165 | (1)    |
| 3241 | (1)    | 3169 | (1)    |
| 3246 | (0)    | 3173 | (1)    |

Table S2. Harmonic vibrational frequencies (in  $\text{cm}^{-1}$ ) and infrared intensities (in parentheses, in  $\text{km/mol}$ ) for the structure 5s-2 of  $(\text{C}_4\text{H}_4\text{P})_2\text{Mn}_2(\text{CO})_5$  with  $\text{C}_1$  symmetry.

| B3LYP |    |     | BP86 |    |     |
|-------|----|-----|------|----|-----|
| a     | 39 | (0) | a    | 38 | (0) |
|       | 44 | (0) |      | 42 | (0) |
|       | 51 | (0) |      | 50 | (0) |
|       | 67 | (0) |      | 67 | (0) |
|       | 74 | (0) |      | 71 | (0) |
|       | 79 | (0) |      | 76 | (0) |

---

|     |      |     |       |
|-----|------|-----|-------|
| 82  | (0)  | 81  | (0)   |
| 90  | (0)  | 90  | (0)   |
| 93  | (0)  | 91  | (0)   |
| 101 | (0)  | 99  | (0)   |
| 102 | (0)  | 101 | (0)   |
| 114 | (0)  | 110 | (0)   |
| 124 | (0)  | 122 | (0)   |
| 138 | (1)  | 139 | (1)   |
| 157 | (1)  | 158 | (1)   |
| 175 | (1)  | 188 | (0)   |
| 195 | (1)  | 191 | (1)   |
| 229 | (4)  | 238 | (1)   |
| 244 | (2)  | 248 | (0)   |
| 300 | (1)  | 311 | (2)   |
| 316 | (5)  | 330 | (7)   |
| 357 | (2)  | 367 | (3)   |
| 423 | (0)  | 419 | (3)   |
| 427 | (2)  | 424 | (1)   |
| 442 | (0)  | 429 | (0)   |
| 450 | (0)  | 449 | (1)   |
| 455 | (9)  | 453 | (20)  |
| 465 | (11) | 468 | (3)   |
| 479 | (1)  | 501 | (4)   |
| 507 | (7)  | 502 | (1)   |
| 510 | (5)  | 505 | (0)   |
| 515 | (2)  | 523 | (2)   |
| 519 | (30) | 529 | (2)   |
| 530 | (3)  | 535 | (6)   |
| 551 | (45) | 540 | (4)   |
| 564 | (10) | 553 | (17)  |
| 574 | (15) | 564 | (8)   |
| 580 | (2)  | 568 | (25)  |
| 600 | (77) | 592 | (94)  |
| 604 | (23) | 602 | (22)  |
| 629 | (46) | 629 | (53)  |
| 649 | (41) | 639 | (26)  |
| 675 | (4)  | 650 | (10)  |
| 682 | (62) | 672 | (13)  |
| 697 | (5)  | 675 | (33)  |
| 706 | (84) | 683 | (22)  |
| 719 | (65) | 690 | (125) |
| 792 | (28) | 766 | (8)   |
| 798 | (8)  | 772 | (18)  |
| 826 | (40) | 794 | (27)  |
| 841 | (20) | 811 | (24)  |
| 854 | (5)  | 823 | (6)   |
| 869 | (5)  | 843 | (4)   |
| 927 | (3)  | 879 | (5)   |

---

|      |        |      |        |
|------|--------|------|--------|
| 931  | (2)    | 884  | (2)    |
| 943  | (0)    | 898  | (0)    |
| 953  | (1)    | 910  | (1)    |
| 1000 | (1)    | 976  | (0)    |
| 1043 | (1)    | 1014 | (1)    |
| 1080 | (3)    | 1042 | (2)    |
| 1092 | (2)    | 1055 | (3)    |
| 1099 | (9)    | 1061 | (9)    |
| 1103 | (17)   | 1063 | (17)   |
| 1263 | (3)    | 1208 | (3)    |
| 1282 | (1)    | 1230 | (2)    |
| 1346 | (1)    | 1295 | (1)    |
| 1371 | (2)    | 1320 | (2)    |
| 1428 | (1)    | 1386 | (2)    |
| 1459 | (3)    | 1402 | (2)    |
| 1479 | (51)   | 1438 | (32)   |
| 1584 | (0)    | 1532 | (0)    |
| 2002 | (204)  | 1925 | (77)   |
| 2026 | (926)  | 1937 | (815)  |
| 2033 | (630)  | 1944 | (599)  |
| 2048 | (1589) | 1969 | (1296) |
| 2091 | (938)  | 2006 | (727)  |
| 3190 | (4)    | 3116 | (5)    |
| 3203 | (9)    | 3129 | (10)   |
| 3220 | (1)    | 3144 | (1)    |
| 3229 | (0)    | 3156 | (0)    |
| 3236 | (0)    | 3166 | (2)    |
| 3238 | (5)    | 3168 | (0)    |
| 3242 | (0)    | 3171 | (2)    |
| 3252 | (1)    | 3173 | (2)    |

Table S3. Harmonic vibrational frequencies (in  $\text{cm}^{-1}$ ) and infrared intensities (in parentheses, in  $\text{km/mol}$ ) for the structure 5S-3 of  $(\text{C}_4\text{H}_4\text{P})_2\text{Mn}_2(\text{CO})_5$  with  $\text{C}_1$  symmetry.

| <b>B3LYP</b> |     |     | <b>BP86</b> |     |     |
|--------------|-----|-----|-------------|-----|-----|
| a            | 18  | (0) | a           | 25  | (0) |
|              | 32  | (0) |             | 28  | (0) |
|              | 48  | (1) |             | 50  | (1) |
|              | 55  | (1) |             | 57  | (1) |
|              | 78  | (1) |             | 73  | (0) |
|              | 88  | (0) |             | 86  | (0) |
|              | 99  | (0) |             | 101 | (0) |
|              | 106 | (0) |             | 106 | (0) |
|              | 113 | (0) |             | 112 | (0) |
|              | 118 | (0) |             | 116 | (0) |
|              | 125 | (0) |             | 123 | (0) |
|              | 133 | (0) |             | 133 | (0) |
|              | 135 | (0) |             | 134 | (0) |
|              | 158 | (3) |             | 161 | (2) |

---

|      |       |      |       |
|------|-------|------|-------|
| 182  | (0)   | 187  | (0)   |
| 242  | (1)   | 243  | (2)   |
| 262  | (2)   | 264  | (2)   |
| 273  | (4)   | 275  | (5)   |
| 300  | (9)   | 304  | (5)   |
| 310  | (4)   | 317  | (2)   |
| 350  | (2)   | 359  | (1)   |
| 359  | (1)   | 372  | (1)   |
| 394  | (10)  | 404  | (3)   |
| 400  | (21)  | 411  | (1)   |
| 450  | (10)  | 436  | (7)   |
| 459  | (0)   | 446  | (1)   |
| 465  | (3)   | 472  | (1)   |
| 470  | (85)  | 479  | (4)   |
| 484  | (5)   | 489  | (8)   |
| 504  | (32)  | 497  | (16)  |
| 513  | (77)  | 524  | (138) |
| 524  | (10)  | 541  | (2)   |
| 537  | (20)  | 548  | (3)   |
| 570  | (13)  | 549  | (5)   |
| 573  | (8)   | 551  | (3)   |
| 578  | (64)  | 570  | (5)   |
| 592  | (13)  | 577  | (2)   |
| 592  | (3)   | 590  | (27)  |
| 599  | (59)  | 596  | (37)  |
| 609  | (328) | 606  | (122) |
| 618  | (26)  | 624  | (173) |
| 647  | (14)  | 638  | (11)  |
| 656  | (144) | 655  | (227) |
| 710  | (8)   | 692  | (11)  |
| 721  | (2)   | 696  | (1)   |
| 823  | (8)   | 799  | (7)   |
| 836  | (11)  | 805  | (8)   |
| 840  | (7)   | 811  | (13)  |
| 850  | (3)   | 820  | (3)   |
| 851  | (48)  | 821  | (36)  |
| 858  | (50)  | 825  | (1)   |
| 859  | (1)   | 830  | (38)  |
| 864  | (7)   | 837  | (11)  |
| 910  | (2)   | 871  | (3)   |
| 935  | (2)   | 895  | (3)   |
| 951  | (1)   | 906  | (1)   |
| 957  | (1)   | 912  | (0)   |
| 1050 | (3)   | 1019 | (2)   |
| 1055 | (2)   | 1023 | (2)   |
| 1067 | (2)   | 1034 | (1)   |
| 1077 | (2)   | 1043 | (2)   |
| 1092 | (1)   | 1056 | (1)   |

---

|      |        |      |        |
|------|--------|------|--------|
| 1092 | (0)    | 1057 | (0)    |
| 1267 | (3)    | 1215 | (6)    |
| 1267 | (6)    | 1216 | (4)    |
| 1328 | (9)    | 1290 | (8)    |
| 1351 | (4)    | 1307 | (6)    |
| 1424 | (1)    | 1376 | (1)    |
| 1432 | (2)    | 1388 | (1)    |
| 1443 | (2)    | 1391 | (1)    |
| 1446 | (2)    | 1400 | (1)    |
| 1857 | (400)  | 1775 | (331)  |
| 2005 | (213)  | 1917 | (185)  |
| 2028 | (773)  | 1941 | (664)  |
| 2037 | (1553) | 1953 | (1251) |
| 2067 | (230)  | 1982 | (173)  |
| 3215 | (0)    | 3142 | (0)    |
| 3220 | (0)    | 3145 | (0)    |
| 3223 | (0)    | 3149 | (0)    |
| 3229 | (0)    | 3154 | (0)    |
| 3230 | (1)    | 3158 | (1)    |
| 3235 | (1)    | 3160 | (1)    |
| 3240 | (0)    | 3166 | (1)    |
| 3245 | (0)    | 3170 | (0)    |

Table S4. Harmonic vibrational frequencies (in  $\text{cm}^{-1}$ ) and infrared intensities (in parentheses, in  $\text{km/mol}$ ) for the structure 5S-4 of  $(\text{C}_4\text{H}_4\text{P})_2\text{Mn}_2(\text{CO})_5$  with  $\text{C}_1$  symmetry.

|   | <b>B3LYP</b> |       | <b>BP86</b> |      |
|---|--------------|-------|-------------|------|
| a | 21           | (0) a | 22          | (0)  |
|   | 25           | (0)   | 30          | (0)  |
|   | 49           | (1)   | 49          | (1)  |
|   | 52           | (1)   | 59          | (1)  |
|   | 78           | (2)   | 72          | (0)  |
|   | 89           | (0)   | 87          | (0)  |
|   | 99           | (0)   | 102         | (0)  |
|   | 101          | (0)   | 105         | (0)  |
|   | 114          | (1)   | 114         | (0)  |
|   | 117          | (0)   | 115         | (0)  |
|   | 125          | (1)   | 122         | (0)  |
|   | 125          | (0)   | 128         | (0)  |
|   | 135          | (0)   | 137         | (0)  |
|   | 159          | (1)   | 162         | (1)  |
|   | 180          | (0)   | 189         | (0)  |
|   | 251          | (5)   | 245         | (0)  |
|   | 255          | (2)   | 259         | (3)  |
|   | 266          | (2)   | 271         | (1)  |
|   | 286          | (4)   | 298         | (10) |
|   | 301          | (12)  | 305         | (2)  |
|   | 347          | (3)   | 363         | (1)  |

---

|      |       |      |       |
|------|-------|------|-------|
| 354  | (0)   | 374  | (0)   |
| 384  | (17)  | 397  | (10)  |
| 390  | (62)  | 409  | (3)   |
| 452  | (15)  | 438  | (2)   |
| 456  | (2)   | 445  | (1)   |
| 463  | (37)  | 468  | (13)  |
| 472  | (42)  | 477  | (5)   |
| 482  | (5)   | 490  | (5)   |
| 505  | (13)  | 498  | (13)  |
| 516  | (84)  | 525  | (137) |
| 521  | (23)  | 539  | (1)   |
| 530  | (15)  | 544  | (2)   |
| 569  | (13)  | 549  | (3)   |
| 573  | (11)  | 550  | (3)   |
| 575  | (101) | 573  | (7)   |
| 587  | (92)  | 576  | (2)   |
| 593  | (50)  | 592  | (85)  |
| 598  | (173) | 594  | (20)  |
| 601  | (32)  | 604  | (168) |
| 614  | (13)  | 618  | (125) |
| 648  | (11)  | 642  | (20)  |
| 654  | (116) | 651  | (161) |
| 710  | (3)   | 692  | (12)  |
| 710  | (4)   | 694  | (3)   |
| 824  | (12)  | 799  | (7)   |
| 824  | (8)   | 804  | (10)  |
| 847  | (15)  | 816  | (12)  |
| 851  | (9)   | 820  | (2)   |
| 852  | (19)  | 822  | (11)  |
| 857  | (33)  | 830  | (39)  |
| 861  | (20)  | 833  | (23)  |
| 866  | (20)  | 838  | (8)   |
| 932  | (2)   | 887  | (4)   |
| 936  | (3)   | 894  | (3)   |
| 952  | (2)   | 905  | (1)   |
| 955  | (0)   | 908  | (1)   |
| 1048 | (3)   | 1018 | (2)   |
| 1052 | (3)   | 1021 | (2)   |
| 1077 | (3)   | 1040 | (2)   |
| 1079 | (2)   | 1044 | (2)   |
| 1093 | (1)   | 1055 | (0)   |
| 1094 | (1)   | 1057 | (0)   |
| 1268 | (4)   | 1215 | (5)   |
| 1269 | (6)   | 1217 | (5)   |
| 1349 | (4)   | 1302 | (6)   |
| 1353 | (5)   | 1307 | (5)   |
| 1431 | (1)   | 1384 | (1)   |
| 1434 | (3)   | 1389 | (2)   |

---



|      |        |      |        |
|------|--------|------|--------|
| 1444 | (1)    | 1391 | (1)    |
| 1447 | (1)    | 1394 | (1)    |
| 1876 | (370)  | 1783 | (305)  |
| 1999 | (196)  | 1913 | (157)  |
| 2025 | (897)  | 1939 | (750)  |
| 2037 | (1473) | 1953 | (1176) |
| 2065 | (238)  | 1981 | (210)  |
| 3215 | (1)    | 3141 | (0)    |
| 3217 | (0)    | 3142 | (0)    |
| 3223 | (0)    | 3149 | (0)    |
| 3225 | (0)    | 3150 | (0)    |
| 3230 | (1)    | 3157 | (1)    |
| 3232 | (1)    | 3159 | (1)    |
| 3241 | (0)    | 3166 | (0)    |
| 3242 | (0)    | 3167 | (0)    |

Table S5. Harmonic vibrational frequencies (in  $\text{cm}^{-1}$ ) and infrared intensities (in parentheses, in  $\text{km/mol}$ ) for the structure 5S-5 of  $(\text{C}_4\text{H}_4\text{P})_2\text{Mn}_2(\text{CO})_5$  with  $\text{C}_1$  symmetry.

| B3LYP |     |      | BP86 |     |      |
|-------|-----|------|------|-----|------|
| a     | 30  | (0)  | a    | 34  | (1)  |
|       | 36  | (1)  |      | 38  | (1)  |
|       | 42  | (1)  |      | 49  | (0)  |
|       | 50  | (0)  |      | 53  | (0)  |
|       | 75  | (1)  |      | 76  | (0)  |
|       | 88  | (1)  |      | 88  | (0)  |
|       | 93  | (0)  |      | 95  | (0)  |
|       | 99  | (0)  |      | 100 | (0)  |
|       | 107 | (0)  |      | 108 | (0)  |
|       | 113 | (1)  |      | 112 | (0)  |
|       | 127 | (1)  |      | 130 | (0)  |
|       | 133 | (1)  |      | 135 | (1)  |
|       | 141 | (0)  |      | 143 | (0)  |
|       | 154 | (3)  |      | 158 | (2)  |
|       | 170 | (1)  |      | 176 | (0)  |
|       | 250 | (2)  |      | 251 | (0)  |
|       | 258 | (1)  |      | 265 | (2)  |
|       | 289 | (6)  |      | 301 | (9)  |
|       | 299 | (7)  |      | 306 | (0)  |
|       | 305 | (6)  |      | 313 | (3)  |
|       | 323 | (4)  |      | 330 | (3)  |
|       | 349 | (0)  |      | 366 | (1)  |
|       | 387 | (16) |      | 400 | (25) |
|       | 403 | (68) |      | 408 | (4)  |
|       | 448 | (19) |      | 436 | (1)  |
|       | 453 | (22) |      | 443 | (0)  |
|       | 459 | (5)  |      | 460 | (4)  |
|       | 466 | (51) |      | 480 | (7)  |
|       | 479 | (5)  |      | 484 | (2)  |

---

|      |        |      |        |
|------|--------|------|--------|
| 489  | (47)   | 503  | (101)  |
| 512  | (11)   | 505  | (12)   |
| 520  | (17)   | 532  | (15)   |
| 529  | (25)   | 538  | (7)    |
| 569  | (22)   | 545  | (1)    |
| 571  | (74)   | 551  | (5)    |
| 575  | (1)    | 573  | (3)    |
| 586  | (16)   | 576  | (2)    |
| 591  | (78)   | 583  | (140)  |
| 594  | (25)   | 589  | (17)   |
| 595  | (210)  | 600  | (91)   |
| 616  | (57)   | 619  | (107)  |
| 646  | (116)  | 641  | (95)   |
| 655  | (42)   | 653  | (163)  |
| 705  | (4)    | 685  | (7)    |
| 713  | (7)    | 694  | (17)   |
| 810  | (10)   | 784  | (10)   |
| 826  | (10)   | 800  | (8)    |
| 843  | (44)   | 811  | (32)   |
| 846  | (7)    | 814  | (10)   |
| 849  | (25)   | 819  | (13)   |
| 856  | (6)    | 828  | (6)    |
| 858  | (11)   | 830  | (13)   |
| 862  | (18)   | 834  | (13)   |
| 929  | (3)    | 889  | (4)    |
| 934  | (1)    | 891  | (1)    |
| 947  | (0)    | 899  | (1)    |
| 957  | (0)    | 910  | (1)    |
| 1048 | (3)    | 1020 | (2)    |
| 1052 | (2)    | 1023 | (2)    |
| 1078 | (2)    | 1044 | (2)    |
| 1082 | (2)    | 1046 | (2)    |
| 1091 | (3)    | 1055 | (2)    |
| 1093 | (0)    | 1057 | (0)    |
| 1267 | (8)    | 1216 | (11)   |
| 1268 | (2)    | 1217 | (1)    |
| 1347 | (4)    | 1305 | (5)    |
| 1354 | (6)    | 1309 | (9)    |
| 1431 | (1)    | 1388 | (2)    |
| 1433 | (2)    | 1389 | (0)    |
| 1445 | (1)    | 1395 | (0)    |
| 1455 | (1)    | 1401 | (1)    |
| 1859 | (420)  | 1770 | (337)  |
| 2000 | (362)  | 1908 | (311)  |
| 2031 | (323)  | 1947 | (303)  |
| 2044 | (850)  | 1960 | (668)  |
| 2083 | (1316) | 1999 | (1080) |
| 3217 | (0)    | 3144 | (0)    |

---

|      |     |      |     |
|------|-----|------|-----|
| 3220 | (0) | 3146 | (0) |
| 3224 | (0) | 3149 | (0) |
| 3228 | (0) | 3152 | (0) |
| 3233 | (1) | 3158 | (0) |
| 3234 | (1) | 3158 | (0) |
| 3244 | (0) | 3166 | (1) |
| 3248 | (1) | 3167 | (0) |

Table S6. Harmonic vibrational frequencies (in  $\text{cm}^{-1}$ ) and infrared intensities (in parentheses, in  $\text{km/mol}$ ) for the structure 4S-1 of  $(\text{C}_4\text{H}_4\text{P})_2\text{Mn}_2(\text{CO})_4$  with  $\text{C}_i$  symmetry.

| B3LYP |      |      | BP86 |      |     |
|-------|------|------|------|------|-----|
| ag    | 81   | (0)  | ag   | 59   | (0) |
|       | 103  | (0)  |      | 81   | (0) |
|       | 106  | (0)  |      | 102  | (0) |
|       | 227  | (0)  |      | 103  | (0) |
|       | 264  | (0)  |      | 174  | (0) |
|       | 341  | (0)  |      | 188  | (0) |
|       | 435  | (0)  |      | 239  | (0) |
|       | 506  | (0)  |      | 286  | (0) |
|       | 587  | (0)  |      | 348  | (0) |
|       | 619  | (0)  |      | 358  | (0) |
|       | 656  | (0)  |      | 420  | (0) |
|       | 823  | (0)  |      | 460  | (0) |
|       | 852  | (0)  |      | 513  | (0) |
|       | 884  | (0)  |      | 522  | (0) |
|       | 1043 | (0)  |      | 541  | (0) |
|       | 1091 | (0)  |      | 569  | (0) |
|       | 1308 | (0)  |      | 582  | (0) |
|       | 1440 | (0)  |      | 617  | (0) |
|       | 2051 | (0)  |      | 650  | (0) |
|       | 3235 | (0)  |      | 693  | (0) |
|       | 3250 | (0)  |      | 777  | (0) |
| au    | 26   | (1)  |      | 792  | (0) |
|       | 60   | (0)  |      | 816  | (0) |
|       | 104  | (0)  |      | 841  | (0) |
|       | 169  | (0)  |      | 845  | (0) |
|       | 175  | (1)  |      | 893  | (0) |
|       | 344  | (3)  |      | 1008 | (0) |
|       | 464  | (0)  |      | 1020 | (0) |
|       | 516  | (0)  |      | 1053 | (0) |
|       | 567  | (25) |      | 1204 | (0) |
|       | 578  | (85) |      | 1267 | (0) |
|       | 726  | (1)  |      | 1368 | (0) |
|       | 812  | (11) |      | 1387 | (0) |
|       | 883  | (5)  |      | 1924 | (0) |
|       | 938  | (3)  |      | 1970 | (0) |
|       | 1057 | (15) |      | 3152 | (0) |
|       | 1261 | (4)  |      | 3161 | (0) |

|    |      |        |    |      |        |
|----|------|--------|----|------|--------|
|    | 1414 | (1)    |    | 3173 | (0)    |
|    | 2005 | (1773) |    | 3176 | (0)    |
|    | 3225 | (0)    | au | 26   | (2)    |
|    | 3246 | (2)    |    | 60   | (0)    |
| bg | 60   | (0)    |    | 81   | (2)    |
|    | 93   | (1)    |    | 91   | (1)    |
|    | 184  | (0)    |    | 106  | (0)    |
|    | 339  | (0)    |    | 181  | (1)    |
|    | 458  | (0)    |    | 233  | (9)    |
|    | 518  | (0)    |    | 295  | (16)   |
|    | 560  | (0)    |    | 355  | (5)    |
|    | 576  | (0)    |    | 364  | (7)    |
|    | 724  | (0)    |    | 414  | (27)   |
|    | 808  | (0)    |    | 467  | (2)    |
|    | 878  | (0)    |    | 512  | (2)    |
|    | 940  | (0)    |    | 519  | (18)   |
|    | 1056 | (0)    |    | 542  | (1)    |
|    | 1259 | (0)    |    | 592  | (77)   |
|    | 1417 | (0)    |    | 602  | (227)  |
|    | 2002 | (0)    |    | 612  | (55)   |
|    | 3225 | (0)    |    | 649  | (95)   |
|    | 3246 | (0)    |    | 694  | (0)    |
| bu | 82   | (2)    |    | 781  | (18)   |
|    | 213  | (7)    |    | 784  | (33)   |
|    | 280  | (4)    |    | 820  | (25)   |
|    | 348  | (12)   |    | 843  | (0)    |
|    | 428  | (29)   |    | 846  | (5)    |
|    | 503  | (39)   |    | 890  | (2)    |
|    | 601  | (232)  |    | 1007 | (9)    |
|    | 620  | (19)   |    | 1021 | (13)   |
|    | 655  | (93)   |    | 1053 | (3)    |
|    | 816  | (61)   |    | 1206 | (4)    |
|    | 853  | (20)   |    | 1269 | (23)   |
|    | 883  | (0)    |    | 1364 | (2)    |
|    | 1041 | (8)    |    | 1388 | (1)    |
|    | 1091 | (3)    |    | 1925 | (1459) |
|    | 1308 | (19)   |    | 1955 | (2311) |
|    | 1440 | (1)    |    | 3152 | (0)    |
|    | 2036 | (2605) |    | 3161 | (1)    |
|    | 3235 | (1)    |    | 3174 | (2)    |
|    | 3249 | (2)    |    | 3176 | (2)    |

Table S7. Harmonic vibrational frequencies (in  $\text{cm}^{-1}$ ) and infrared intensities (in parentheses, in  $\text{km/mol}$ ) for the structure 4S-2 of  $(\text{C}_4\text{H}_4\text{P})_2\text{Mn}_2(\text{CO})_4$  with  $\text{C}_1$  symmetry.

|   | B3LYP |     |   | BP86 |     |
|---|-------|-----|---|------|-----|
| a | 22    | (1) | a | 21   | (0) |
|   | 33    | (0) |   | 32   | (0) |
|   | 40    | (1) |   | 40   | (1) |

---

|     |      |     |      |
|-----|------|-----|------|
| 73  | (1)  | 74  | (2)  |
| 86  | (0)  | 83  | (0)  |
| 89  | (2)  | 92  | (1)  |
| 98  | (0)  | 98  | (0)  |
| 108 | (1)  | 103 | (1)  |
| 114 | (0)  | 116 | (0)  |
| 128 | (0)  | 124 | (0)  |
| 150 | (0)  | 147 | (0)  |
| 155 | (0)  | 156 | (0)  |
| 165 | (1)  | 176 | (1)  |
| 181 | (0)  | 193 | (0)  |
| 246 | (2)  | 249 | (4)  |
| 259 | (0)  | 263 | (0)  |
| 301 | (3)  | 301 | (4)  |
| 315 | (0)  | 316 | (3)  |
| 340 | (3)  | 358 | (2)  |
| 350 | (0)  | 373 | (2)  |
| 391 | (4)  | 376 | (3)  |
| 420 | (0)  | 416 | (2)  |
| 456 | (5)  | 441 | (2)  |
| 460 | (0)  | 443 | (4)  |
| 481 | (6)  | 478 | (14) |
| 493 | (0)  | 481 | (0)  |
| 505 | (9)  | 508 | (1)  |
| 510 | (8)  | 526 | (2)  |
| 542 | (23) | 543 | (22) |
| 548 | (37) | 548 | (31) |
| 558 | (81) | 550 | (1)  |
| 567 | (8)  | 556 | (7)  |
| 574 | (5)  | 563 | (75) |
| 576 | (8)  | 565 | (4)  |
| 592 | (2)  | 577 | (20) |
| 593 | (0)  | 582 | (5)  |
| 627 | (7)  | 614 | (9)  |
| 638 | (47) | 633 | (29) |
| 708 | (1)  | 683 | (1)  |
| 711 | (0)  | 690 | (1)  |
| 823 | (21) | 797 | (14) |
| 824 | (14) | 799 | (11) |
| 836 | (15) | 809 | (12) |
| 841 | (22) | 816 | (11) |
| 851 | (19) | 827 | (10) |
| 859 | (3)  | 827 | (7)  |
| 859 | (12) | 831 | (26) |
| 860 | (29) | 840 | (19) |
| 917 | (3)  | 878 | (3)  |
| 926 | (3)  | 891 | (3)  |
| 948 | (1)  | 901 | (1)  |

---

|      |        |      |        |
|------|--------|------|--------|
| 948  | (0)    | 904  | (3)    |
| 1048 | (4)    | 1018 | (3)    |
| 1049 | (4)    | 1022 | (3)    |
| 1074 | (3)    | 1040 | (2)    |
| 1077 | (2)    | 1043 | (3)    |
| 1089 | (1)    | 1054 | (0)    |
| 1091 | (1)    | 1057 | (1)    |
| 1266 | (5)    | 1215 | (6)    |
| 1268 | (4)    | 1217 | (4)    |
| 1344 | (6)    | 1301 | (7)    |
| 1350 | (5)    | 1309 | (5)    |
| 1427 | (1)    | 1381 | (1)    |
| 1427 | (1)    | 1387 | (2)    |
| 1442 | (1)    | 1389 | (1)    |
| 1442 | (1)    | 1393 | (1)    |
| 1950 | (24)   | 1851 | (189)  |
| 1965 | (1088) | 1868 | (571)  |
| 2030 | (1477) | 1932 | (1153) |
| 2043 | (25)   | 1948 | (124)  |
| 3214 | (0)    | 3140 | (0)    |
| 3215 | (0)    | 3140 | (0)    |
| 3223 | (0)    | 3145 | (0)    |
| 3223 | (0)    | 3147 | (0)    |
| 3231 | (1)    | 3154 | (0)    |
| 3231 | (1)    | 3156 | (1)    |
| 3238 | (0)    | 3162 | (2)    |
| 3238 | (1)    | 3162 | (1)    |

Table S8. Harmonic vibrational frequencies (in  $\text{cm}^{-1}$ ) and infrared intensities (in parentheses, in  $\text{km/mol}$ ) for the structure 4S-3 of  $(\text{C}_4\text{H}_4\text{P})_2\text{Mn}_2(\text{CO})_4$  with  $\text{C}_1$  symmetry.

| <b>B3LYP</b> |     |     | <b>BP86</b> |     |     |
|--------------|-----|-----|-------------|-----|-----|
| a            | 21  | (0) | a           | 27  | (1) |
|              | 28  | (1) |             | 31  | (1) |
|              | 51  | (0) |             | 50  | (0) |
|              | 69  | (0) |             | 69  | (1) |
|              | 82  | (0) |             | 74  | (0) |
|              | 86  | (2) |             | 91  | (1) |
|              | 95  | (0) |             | 95  | (1) |
|              | 97  | (0) |             | 96  | (1) |
|              | 111 | (0) |             | 113 | (0) |
|              | 128 | (1) |             | 128 | (1) |
|              | 135 | (0) |             | 137 | (0) |
|              | 152 | (0) |             | 150 | (0) |
|              | 163 | (0) |             | 154 | (0) |
|              | 173 | (0) |             | 183 | (0) |
|              | 253 | (1) |             | 258 | (3) |
|              | 289 | (1) |             | 298 | (3) |
|              | 309 | (1) |             | 311 | (1) |

---

|      |      |      |      |
|------|------|------|------|
| 316  | (1)  | 323  | (4)  |
| 320  | (1)  | 330  | (3)  |
| 341  | (1)  | 360  | (1)  |
| 379  | (3)  | 381  | (3)  |
| 431  | (3)  | 422  | (3)  |
| 448  | (6)  | 437  | (4)  |
| 454  | (2)  | 440  | (0)  |
| 479  | (4)  | 476  | (4)  |
| 484  | (6)  | 484  | (2)  |
| 496  | (1)  | 502  | (1)  |
| 506  | (9)  | 514  | (2)  |
| 540  | (44) | 531  | (17) |
| 545  | (53) | 547  | (7)  |
| 547  | (31) | 551  | (75) |
| 566  | (25) | 553  | (20) |
| 574  | (5)  | 559  | (21) |
| 583  | (3)  | 567  | (3)  |
| 592  | (2)  | 574  | (11) |
| 593  | (1)  | 583  | (2)  |
| 628  | (16) | 617  | (17) |
| 635  | (35) | 627  | (27) |
| 709  | (4)  | 686  | (3)  |
| 711  | (1)  | 688  | (1)  |
| 816  | (45) | 787  | (39) |
| 823  | (20) | 797  | (18) |
| 826  | (8)  | 798  | (1)  |
| 838  | (17) | 808  | (11) |
| 838  | (5)  | 810  | (6)  |
| 851  | (18) | 824  | (3)  |
| 856  | (8)  | 825  | (2)  |
| 857  | (11) | 830  | (27) |
| 916  | (0)  | 874  | (1)  |
| 917  | (5)  | 882  | (6)  |
| 940  | (1)  | 894  | (0)  |
| 948  | (0)  | 900  | (1)  |
| 1047 | (4)  | 1018 | (4)  |
| 1057 | (4)  | 1029 | (4)  |
| 1069 | (1)  | 1034 | (1)  |
| 1075 | (3)  | 1042 | (3)  |
| 1086 | (2)  | 1052 | (1)  |
| 1090 | (1)  | 1055 | (0)  |
| 1265 | (5)  | 1213 | (7)  |
| 1266 | (5)  | 1215 | (5)  |
| 1328 | (4)  | 1285 | (6)  |
| 1347 | (5)  | 1303 | (6)  |
| 1426 | (1)  | 1372 | (2)  |
| 1427 | (3)  | 1380 | (1)  |
| 1442 | (1)  | 1391 | (1)  |

---

|      |        |      |        |
|------|--------|------|--------|
| 1447 | (1)    | 1408 | (0)    |
| 1955 | (76)   | 1864 | (128)  |
| 1974 | (1119) | 1876 | (671)  |
| 2027 | (129)  | 1936 | (164)  |
| 2065 | (1486) | 1972 | (1208) |
| 3214 | (0)    | 3139 | (0)    |
| 3215 | (0)    | 3140 | (0)    |
| 3218 | (1)    | 3144 | (0)    |
| 3220 | (1)    | 3144 | (1)    |
| 3230 | (1)    | 3155 | (1)    |
| 3232 | (1)    | 3156 | (0)    |
| 3238 | (0)    | 3163 | (1)    |
| 3244 | (2)    | 3163 | (2)    |

Table S9. Harmonic vibrational frequencies (in  $\text{cm}^{-1}$ ) and infrared intensities (in parentheses, in  $\text{km/mol}$ ) for the structure 4T-1 of  $(\text{C}_4\text{H}_4\text{P})_2\text{Mn}_2(\text{CO})_4$  with  $C_1$  symmetry.

| B3LYP |     |      | BP86 |     |      |
|-------|-----|------|------|-----|------|
| a     | 20  | (0)  | a    | 38  | (0)  |
|       | 39  | (0)  |      | 62  | (0)  |
|       | 53  | (1)  |      | 62  | (0)  |
|       | 66  | (0)  |      | 72  | (1)  |
|       | 75  | (1)  |      | 77  | (0)  |
|       | 75  | (1)  |      | 88  | (0)  |
|       | 94  | (0)  |      | 95  | (0)  |
|       | 97  | (0)  |      | 104 | (0)  |
|       | 101 | (0)  |      | 118 | (0)  |
|       | 110 | (0)  |      | 125 | (0)  |
|       | 116 | (1)  |      | 137 | (0)  |
|       | 124 | (0)  |      | 147 | (1)  |
|       | 160 | (0)  |      | 188 | (3)  |
|       | 206 | (0)  |      | 199 | (0)  |
|       | 224 | (5)  |      | 241 | (7)  |
|       | 252 | (1)  |      | 276 | (0)  |
|       | 262 | (2)  |      | 309 | (2)  |
|       | 266 | (1)  |      | 318 | (12) |
|       | 307 | (6)  |      | 339 | (1)  |
|       | 354 | (1)  |      | 344 | (12) |
|       | 367 | (18) |      | 420 | (7)  |
|       | 386 | (14) |      | 421 | (1)  |
|       | 415 | (6)  |      | 440 | (1)  |
|       | 440 | (1)  |      | 445 | (2)  |
|       | 448 | (6)  |      | 470 | (1)  |
|       | 459 | (7)  |      | 473 | (11) |
|       | 493 | (2)  |      | 491 | (51) |
|       | 500 | (24) |      | 494 | (3)  |
|       | 509 | (16) |      | 530 | (4)  |
|       | 516 | (14) |      | 531 | (1)  |
|       | 543 | (39) |      | 542 | (15) |



---

|      |        |      |        |
|------|--------|------|--------|
| 554  | (10)   | 543  | (6)    |
| 565  | (6)    | 555  | (51)   |
| 580  | (16)   | 556  | (15)   |
| 583  | (10)   | 572  | (0)    |
| 592  | (20)   | 573  | (41)   |
| 607  | (56)   | 625  | (68)   |
| 652  | (53)   | 629  | (20)   |
| 695  | (3)    | 659  | (1)    |
| 703  | (5)    | 664  | (1)    |
| 795  | (37)   | 763  | (1)    |
| 807  | (5)    | 768  | (0)    |
| 810  | (2)    | 789  | (34)   |
| 818  | (33)   | 791  | (14)   |
| 820  | (17)   | 803  | (0)    |
| 838  | (21)   | 803  | (40)   |
| 855  | (7)    | 820  | (3)    |
| 858  | (2)    | 822  | (6)    |
| 907  | (3)    | 874  | (3)    |
| 917  | (2)    | 875  | (2)    |
| 938  | (1)    | 907  | (0)    |
| 949  | (1)    | 908  | (2)    |
| 1043 | (3)    | 1011 | (3)    |
| 1048 | (1)    | 1014 | (0)    |
| 1073 | (3)    | 1039 | (2)    |
| 1077 | (11)   | 1043 | (13)   |
| 1090 | (8)    | 1055 | (2)    |
| 1090 | (1)    | 1056 | (0)    |
| 1262 | (3)    | 1209 | (1)    |
| 1266 | (3)    | 1213 | (3)    |
| 1325 | (2)    | 1294 | (11)   |
| 1341 | (2)    | 1298 | (0)    |
| 1428 | (8)    | 1390 | (5)    |
| 1431 | (15)   | 1392 | (1)    |
| 1445 | (5)    | 1398 | (0)    |
| 1451 | (1)    | 1399 | (3)    |
| 1981 | (298)  | 1910 | (342)  |
| 2004 | (1044) | 1925 | (597)  |
| 2032 | (2373) | 1940 | (2211) |
| 2065 | (606)  | 1975 | (508)  |
| 3210 | (1)    | 3135 | (2)    |
| 3215 | (1)    | 3136 | (1)    |
| 3224 | (0)    | 3148 | (2)    |
| 3226 | (0)    | 3149 | (0)    |
| 3232 | (0)    | 3157 | (1)    |
| 3236 | (0)    | 3159 | (1)    |
| 3239 | (1)    | 3166 | (1)    |
| 3241 | (1)    | 3166 | (1)    |

---

Table S10. Harmonic vibrational frequencies (in  $\text{cm}^{-1}$ ) and infrared intensities (in parentheses, in  $\text{km/mol}$ ) for the structure 4T-2 of  $(\text{C}_4\text{H}_4\text{P})_2\text{Mn}_2(\text{CO})_4$  with  $\text{C}_2$  symmetry.

| B3LYP |     |       | BP86 |     |       |
|-------|-----|-------|------|-----|-------|
| a     | 23  | (0)   | a    | 27  | (0)   |
|       | 34  | (1)   |      | 31  | (0)   |
|       | 42  | (0)   |      | 56  | (0)   |
|       | 53  | (1)   |      | 59  | (1)   |
|       | 82  | (0)   |      | 81  | (0)   |
|       | 85  | (0)   |      | 92  | (0)   |
|       | 95  | (0)   |      | 94  | (1)   |
|       | 98  | (1)   |      | 99  | (0)   |
|       | 103 | (0)   |      | 107 | (1)   |
|       | 107 | (2)   |      | 125 | (0)   |
|       | 127 | (0)   |      | 138 | (1)   |
|       | 152 | (0)   |      | 155 | (2)   |
|       | 153 | (4)   |      | 160 | (1)   |
|       | 169 | (1)   |      | 195 | (3)   |
|       | 242 | (4)   |      | 244 | (6)   |
|       | 273 | (3)   |      | 271 | (4)   |
|       | 278 | (2)   |      | 290 | (7)   |
|       | 298 | (2)   |      | 312 | (6)   |
|       | 311 | (1)   |      | 317 | (7)   |
|       | 328 | (0)   |      | 325 | (3)   |
|       | 347 | (4)   |      | 343 | (2)   |
|       | 417 | (85)  |      | 419 | (17)  |
|       | 434 | (1)   |      | 423 | (23)  |
|       | 440 | (1)   |      | 437 | (6)   |
|       | 448 | (4)   |      | 449 | (7)   |
|       | 460 | (1)   |      | 451 | (4)   |
|       | 460 | (17)  |      | 469 | (13)  |
|       | 497 | (90)  |      | 500 | (70)  |
|       | 509 | (20)  |      | 513 | (8)   |
|       | 517 | (29)  |      | 521 | (15)  |
|       | 541 | (39)  |      | 522 | (5)   |
|       | 562 | (47)  |      | 541 | (10)  |
|       | 570 | (98)  |      | 547 | (0)   |
|       | 576 | (210) |      | 565 | (2)   |
|       | 585 | (33)  |      | 571 | (12)  |
|       | 594 | (7)   |      | 594 | (172) |
|       | 616 | (34)  |      | 613 | (34)  |
|       | 618 | (98)  |      | 622 | (145) |
|       | 697 | (2)   |      | 665 | (4)   |
|       | 706 | (4)   |      | 685 | (8)   |
|       | 800 | (58)  |      | 778 | (8)   |
|       | 811 | (2)   |      | 789 | (14)  |
|       | 816 | (14)  |      | 792 | (10)  |
|       | 821 | (6)   |      | 794 | (26)  |
|       | 840 | (34)  |      | 815 | (15)  |

|      |        |      |        |
|------|--------|------|--------|
| 847  | (5)    | 817  | (5)    |
| 851  | (5)    | 826  | (19)   |
| 861  | (18)   | 828  | (21)   |
| 893  | (2)    | 865  | (3)    |
| 927  | (2)    | 881  | (1)    |
| 929  | (0)    | 898  | (1)    |
| 950  | (1)    | 911  | (1)    |
| 1050 | (4)    | 1022 | (5)    |
| 1054 | (4)    | 1025 | (4)    |
| 1071 | (3)    | 1041 | (4)    |
| 1079 | (1)    | 1044 | (1)    |
| 1088 | (2)    | 1055 | (1)    |
| 1092 | (2)    | 1059 | (2)    |
| 1263 | (6)    | 1212 | (6)    |
| 1267 | (5)    | 1215 | (5)    |
| 1330 | (5)    | 1293 | (7)    |
| 1352 | (5)    | 1302 | (6)    |
| 1430 | (0)    | 1388 | (1)    |
| 1436 | (1)    | 1391 | (0)    |
| 1444 | (2)    | 1396 | (3)    |
| 1449 | (1)    | 1397 | (0)    |
| 1928 | (274)  | 1785 | (383)  |
| 1942 | (705)  | 1847 | (348)  |
| 2010 | (624)  | 1936 | (405)  |
| 2070 | (1244) | 1979 | (1084) |
| 3205 | (1)    | 3134 | (1)    |
| 3213 | (0)    | 3142 | (0)    |
| 3216 | (0)    | 3143 | (1)    |
| 3220 | (0)    | 3148 | (0)    |
| 3223 | (3)    | 3155 | (1)    |
| 3230 | (1)    | 3157 | (1)    |
| 3232 | (3)    | 3160 | (3)    |
| 3239 | (2)    | 3167 | (3)    |

Table S11. Harmonic vibrational frequencies (in  $\text{cm}^{-1}$ ) and infrared intensities (in parentheses, in  $\text{km/mol}$ ) for the structure 4T-3 of  $(\text{C}_4\text{H}_4\text{P})_2\text{Mn}_2(\text{CO})_4$  with  $C_1$  symmetry.

| B3LYP |     |     | BP86 |     |     |
|-------|-----|-----|------|-----|-----|
| a     | 19  | (0) | a    | 17  | (0) |
|       | 27  | (1) |      | 35  | (1) |
|       | 40  | (1) |      | 44  | (1) |
|       | 46  | (0) |      | 49  | (0) |
|       | 83  | (0) |      | 78  | (0) |
|       | 87  | (1) |      | 86  | (0) |
|       | 96  | (1) |      | 93  | (0) |
|       | 98  | (0) |      | 100 | (0) |
|       | 117 | (3) |      | 115 | (0) |
|       | 120 | (0) |      | 118 | (0) |

---

|      |       |      |       |
|------|-------|------|-------|
| 125  | (1)   | 126  | (1)   |
| 144  | (2)   | 146  | (0)   |
| 166  | (3)   | 165  | (1)   |
| 203  | (0)   | 215  | (2)   |
| 251  | (7)   | 259  | (2)   |
| 258  | (1)   | 261  | (4)   |
| 281  | (3)   | 289  | (2)   |
| 304  | (3)   | 317  | (2)   |
| 310  | (4)   | 320  | (2)   |
| 349  | (31)  | 349  | (3)   |
| 352  | (21)  | 362  | (3)   |
| 405  | (60)  | 413  | (15)  |
| 430  | (5)   | 421  | (2)   |
| 441  | (7)   | 429  | (13)  |
| 453  | (4)   | 438  | (15)  |
| 466  | (45)  | 467  | (7)   |
| 478  | (1)   | 478  | (1)   |
| 504  | (56)  | 508  | (83)  |
| 511  | (23)  | 513  | (4)   |
| 531  | (19)  | 530  | (0)   |
| 536  | (50)  | 535  | (9)   |
| 563  | (2)   | 548  | (4)   |
| 573  | (31)  | 553  | (13)  |
| 586  | (26)  | 567  | (9)   |
| 590  | (34)  | 570  | (3)   |
| 595  | (221) | 591  | (158) |
| 617  | (71)  | 611  | (47)  |
| 637  | (110) | 628  | (144) |
| 697  | (2)   | 671  | (4)   |
| 712  | (5)   | 692  | (5)   |
| 812  | (9)   | 785  | (6)   |
| 820  | (46)  | 799  | (48)  |
| 826  | (11)  | 801  | (4)   |
| 828  | (23)  | 803  | (13)  |
| 846  | (19)  | 814  | (10)  |
| 848  | (3)   | 818  | (1)   |
| 854  | (11)  | 820  | (22)  |
| 859  | (16)  | 826  | (11)  |
| 908  | (2)   | 871  | (2)   |
| 921  | (3)   | 876  | (3)   |
| 941  | (0)   | 900  | (0)   |
| 955  | (1)   | 916  | (1)   |
| 1052 | (4)   | 1023 | (4)   |
| 1052 | (2)   | 1023 | (3)   |
| 1073 | (3)   | 1039 | (2)   |
| 1074 | (2)   | 1040 | (1)   |
| 1090 | (1)   | 1056 | (0)   |
| 1091 | (1)   | 1057 | (1)   |

---

|      |        |      |        |
|------|--------|------|--------|
| 1264 | (5)    | 1213 | (6)    |
| 1267 | (4)    | 1216 | (5)    |
| 1333 | (4)    | 1291 | (6)    |
| 1342 | (6)    | 1297 | (8)    |
| 1431 | (4)    | 1381 | (3)    |
| 1435 | (1)    | 1388 | (1)    |
| 1442 | (0)    | 1397 | (1)    |
| 1444 | (1)    | 1397 | (0)    |
| 1883 | (541)  | 1782 | (430)  |
| 1970 | (465)  | 1869 | (300)  |
| 2014 | (1420) | 1928 | (1054) |
| 2044 | (330)  | 1952 | (317)  |
| 3209 | (0)    | 3138 | (0)    |
| 3216 | (1)    | 3142 | (1)    |
| 3217 | (0)    | 3145 | (0)    |
| 3224 | (0)    | 3150 | (0)    |
| 3227 | (1)    | 3155 | (0)    |
| 3232 | (0)    | 3158 | (0)    |
| 3234 | (1)    | 3161 | (1)    |
| 3240 | (0)    | 3165 | (1)    |

Table S12. Harmonic vibrational frequencies (in  $\text{cm}^{-1}$ ) and infrared intensities (in parentheses, in  $\text{km/mol}$ ) for the structure 4T-4 of  $(\text{C}_4\text{H}_4\text{P})_2\text{Mn}_2(\text{CO})_4$  with  $\text{C}_1$  symmetry.

| <b>B3LYP</b> |     |      | <b>BP86</b> |     |      |
|--------------|-----|------|-------------|-----|------|
| a            | 12  | (1)  | a           | 19  | (1)  |
|              | 25  | (0)  |             | 29  | (0)  |
|              | 39  | (2)  |             | 52  | (1)  |
|              | 51  | (1)  |             | 55  | (1)  |
|              | 82  | (2)  |             | 74  | (2)  |
|              | 85  | (3)  |             | 90  | (0)  |
|              | 94  | (1)  |             | 96  | (1)  |
|              | 100 | (0)  |             | 98  | (0)  |
|              | 103 | (1)  |             | 108 | (2)  |
|              | 118 | (2)  |             | 122 | (2)  |
|              | 125 | (0)  |             | 125 | (1)  |
|              | 146 | (1)  |             | 146 | (2)  |
|              | 160 | (5)  |             | 156 | (3)  |
|              | 187 | (1)  |             | 197 | (3)  |
|              | 244 | (8)  |             | 252 | (5)  |
|              | 261 | (1)  |             | 268 | (2)  |
|              | 281 | (7)  |             | 289 | (11) |
|              | 298 | (3)  |             | 295 | (3)  |
|              | 305 | (1)  |             | 308 | (10) |
|              | 349 | (10) |             | 320 | (1)  |
|              | 356 | (21) |             | 364 | (2)  |
|              | 395 | (75) |             | 419 | (13) |
|              | 427 | (6)  |             | 425 | (14) |
|              | 437 | (2)  |             | 441 | (2)  |

---

|      |        |      |        |
|------|--------|------|--------|
| 451  | (7)    | 449  | (6)    |
| 458  | (1)    | 452  | (11)   |
| 469  | (16)   | 471  | (8)    |
| 495  | (75)   | 500  | (71)   |
| 508  | (30)   | 516  | (10)   |
| 524  | (33)   | 524  | (8)    |
| 540  | (24)   | 524  | (1)    |
| 564  | (0)    | 542  | (7)    |
| 572  | (24)   | 549  | (3)    |
| 584  | (35)   | 565  | (1)    |
| 590  | (261)  | 576  | (5)    |
| 593  | (24)   | 598  | (133)  |
| 609  | (25)   | 609  | (47)   |
| 631  | (101)  | 629  | (149)  |
| 694  | (3)    | 664  | (3)    |
| 711  | (3)    | 692  | (3)    |
| 807  | (25)   | 778  | (15)   |
| 818  | (51)   | 789  | (55)   |
| 824  | (10)   | 793  | (3)    |
| 825  | (6)    | 796  | (10)   |
| 848  | (12)   | 814  | (8)    |
| 849  | (4)    | 818  | (4)    |
| 856  | (25)   | 824  | (14)   |
| 858  | (7)    | 826  | (13)   |
| 904  | (2)    | 862  | (3)    |
| 928  | (2)    | 883  | (2)    |
| 936  | (0)    | 889  | (0)    |
| 949  | (1)    | 900  | (1)    |
| 1049 | (3)    | 1016 | (2)    |
| 1053 | (5)    | 1020 | (5)    |
| 1073 | (5)    | 1043 | (3)    |
| 1077 | (2)    | 1045 | (2)    |
| 1088 | (2)    | 1057 | (1)    |
| 1091 | (1)    | 1058 | (2)    |
| 1262 | (4)    | 1212 | (6)    |
| 1267 | (4)    | 1216 | (5)    |
| 1331 | (5)    | 1293 | (6)    |
| 1349 | (4)    | 1307 | (5)    |
| 1430 | (2)    | 1385 | (1)    |
| 1437 | (2)    | 1392 | (0)    |
| 1442 | (3)    | 1394 | (1)    |
| 1443 | (1)    | 1395 | (3)    |
| 1888 | (453)  | 1774 | (383)  |
| 1966 | (587)  | 1861 | (372)  |
| 2009 | (489)  | 1933 | (342)  |
| 2063 | (1371) | 1973 | (1173) |
| 3208 | (0)    | 3136 | (0)    |
| 3216 | (0)    | 3143 | (0)    |

---

|      |     |      |     |
|------|-----|------|-----|
| 3219 | (0) | 3145 | (0) |
| 3223 | (0) | 3150 | (0) |
| 3227 | (1) | 3157 | (0) |
| 3232 | (0) | 3158 | (0) |
| 3235 | (2) | 3161 | (1) |
| 3239 | (0) | 3165 | (1) |

Table S13. Harmonic vibrational frequencies (in  $\text{cm}^{-1}$ ) and infrared intensities (in parentheses, in  $\text{km/mol}$ ) for the structure 3S-1 of  $(\text{C}_4\text{H}_4\text{P})_2\text{Mn}_2(\text{CO})_3$  with  $\text{C}_1$  symmetry.

| <b>B3LYP</b> |     |       | <b>BP86</b> |     |       |
|--------------|-----|-------|-------------|-----|-------|
| a            | 25  | (1)   | a           | 23  | (0)   |
|              | 37  | (0)   |             | 35  | (0)   |
|              | 85  | (1)   |             | 84  | (2)   |
|              | 89  | (1)   |             | 87  | (2)   |
|              | 113 | (1)   |             | 110 | (1)   |
|              | 116 | (0)   |             | 113 | (0)   |
|              | 133 | (0)   |             | 140 | (0)   |
|              | 137 | (1)   |             | 147 | (0)   |
|              | 159 | (0)   |             | 190 | (0)   |
|              | 162 | (0)   |             | 193 | (0)   |
|              | 193 | (0)   |             | 205 | (2)   |
|              | 198 | (0)   |             | 206 | (0)   |
|              | 293 | (4)   |             | 295 | (9)   |
|              | 304 | (1)   |             | 312 | (4)   |
|              | 319 | (2)   |             | 330 | (5)   |
|              | 322 | (6)   |             | 340 | (3)   |
|              | 366 | (8)   |             | 374 | (16)  |
|              | 423 | (0)   |             | 405 | (0)   |
|              | 425 | (0)   |             | 423 | (0)   |
|              | 446 | (1)   |             | 431 | (2)   |
|              | 449 | (0)   |             | 434 | (1)   |
|              | 464 | (9)   |             | 457 | (1)   |
|              | 469 | (2)   |             | 459 | (1)   |
|              | 487 | (242) |             | 508 | (16)  |
|              | 514 | (27)  |             | 513 | (7)   |
|              | 515 | (12)  |             | 534 | (193) |
|              | 538 | (0)   |             | 540 | (0)   |
|              | 568 | (0)   |             | 540 | (3)   |
|              | 569 | (0)   |             | 546 | (0)   |
|              | 587 | (25)  |             | 575 | (15)  |
|              | 593 | (20)  |             | 575 | (2)   |
|              | 597 | (12)  |             | 580 | (1)   |
|              | 598 | (1)   |             | 582 | (18)  |
|              | 710 | (1)   |             | 689 | (0)   |
|              | 710 | (1)   |             | 691 | (1)   |
|              | 824 | (25)  |             | 799 | (22)  |
|              | 825 | (0)   |             | 800 | (0)   |
|              | 851 | (6)   |             | 818 | (2)   |

|      |       |      |       |
|------|-------|------|-------|
| 851  | (51)  | 819  | (5)   |
| 852  | (0)   | 821  | (35)  |
| 852  | (7)   | 821  | (2)   |
| 859  | (2)   | 829  | (2)   |
| 860  | (4)   | 829  | (5)   |
| 923  | (6)   | 877  | (7)   |
| 923  | (0)   | 878  | (1)   |
| 943  | (1)   | 895  | (2)   |
| 943  | (2)   | 895  | (1)   |
| 1053 | (2)   | 1025 | (8)   |
| 1053 | (8)   | 1025 | (2)   |
| 1074 | (1)   | 1040 | (1)   |
| 1074 | (4)   | 1040 | (4)   |
| 1090 | (1)   | 1055 | (1)   |
| 1090 | (3)   | 1055 | (2)   |
| 1265 | (2)   | 1215 | (3)   |
| 1266 | (6)   | 1215 | (7)   |
| 1344 | (6)   | 1301 | (7)   |
| 1344 | (2)   | 1301 | (2)   |
| 1436 | (0)   | 1386 | (1)   |
| 1436 | (1)   | 1386 | (2)   |
| 1438 | (1)   | 1395 | (0)   |
| 1438 | (2)   | 1395 | (0)   |
| 1928 | (989) | 1830 | (793) |
| 1929 | (998) | 1832 | (795) |
| 1957 | (0)   | 1861 | (0)   |
| 3215 | (0)   | 3140 | (0)   |
| 3215 | (0)   | 3140 | (0)   |
| 3222 | (0)   | 3146 | (0)   |
| 3222 | (0)   | 3146 | (0)   |
| 3231 | (0)   | 3155 | (0)   |
| 3231 | (0)   | 3155 | (0)   |
| 3238 | (1)   | 3161 | (1)   |
| 3238 | (0)   | 3162 | (0)   |

Table S14. Harmonic vibrational frequencies (in  $\text{cm}^{-1}$ ) and infrared intensities (in parentheses, in  $\text{km/mol}$ ) for the structure 3S-2 of  $(\text{C}_4\text{H}_4\text{P})_2\text{Mn}_2(\text{CO})_3$  with  $\text{C}_1$  symmetry.

| B3LYP |     |     | BP86 |     |     |
|-------|-----|-----|------|-----|-----|
| a     | 34  | (1) | a    | 26  | (0) |
|       | 55  | (0) |      | 39  | (1) |
|       | 61  | (1) |      | 74  | (1) |
|       | 71  | (0) |      | 85  | (0) |
|       | 89  | (0) |      | 96  | (0) |
|       | 96  | (1) |      | 101 | (0) |
|       | 105 | (0) |      | 123 | (0) |
|       | 126 | (1) |      | 133 | (2) |
|       | 153 | (1) |      | 155 | (0) |
|       | 163 | (0) |      | 171 | (1) |



---

|      |      |      |      |
|------|------|------|------|
| 170  | (0)  | 203  | (3)  |
| 194  | (0)  | 238  | (1)  |
| 292  | (4)  | 290  | (5)  |
| 294  | (1)  | 309  | (10) |
| 313  | (5)  | 339  | (19) |
| 331  | (4)  | 342  | (2)  |
| 347  | (4)  | 369  | (7)  |
| 379  | (4)  | 383  | (3)  |
| 412  | (4)  | 411  | (2)  |
| 453  | (1)  | 429  | (2)  |
| 458  | (3)  | 432  | (14) |
| 480  | (20) | 461  | (4)  |
| 489  | (5)  | 473  | (7)  |
| 504  | (13) | 497  | (20) |
| 512  | (26) | 516  | (66) |
| 539  | (15) | 530  | (1)  |
| 554  | (46) | 533  | (4)  |
| 564  | (17) | 539  | (12) |
| 565  | (1)  | 543  | (7)  |
| 575  | (10) | 565  | (17) |
| 585  | (24) | 573  | (5)  |
| 594  | (5)  | 579  | (6)  |
| 635  | (42) | 594  | (10) |
| 686  | (3)  | 643  | (0)  |
| 705  | (1)  | 686  | (0)  |
| 790  | (2)  | 744  | (1)  |
| 818  | (16) | 764  | (1)  |
| 825  | (15) | 787  | (31) |
| 833  | (38) | 799  | (7)  |
| 840  | (7)  | 810  | (21) |
| 841  | (30) | 814  | (6)  |
| 846  | (5)  | 819  | (6)  |
| 848  | (8)  | 831  | (16) |
| 914  | (1)  | 846  | (9)  |
| 932  | (2)  | 870  | (1)  |
| 936  | (1)  | 887  | (3)  |
| 945  | (2)  | 911  | (1)  |
| 1039 | (4)  | 1002 | (3)  |
| 1040 | (2)  | 1027 | (3)  |
| 1074 | (5)  | 1030 | (8)  |
| 1081 | (3)  | 1041 | (2)  |
| 1088 | (1)  | 1049 | (0)  |
| 1092 | (2)  | 1057 | (1)  |
| 1261 | (5)  | 1186 | (6)  |
| 1263 | (4)  | 1216 | (6)  |
| 1348 | (4)  | 1270 | (6)  |
| 1352 | (3)  | 1299 | (6)  |
| 1420 | (2)  | 1377 | (0)  |

---

|      |        |      |        |
|------|--------|------|--------|
| 1422 | (2)    | 1382 | (1)    |
| 1444 | (1)    | 1385 | (0)    |
| 1460 | (2)    | 1402 | (0)    |
| 1945 | (545)  | 1813 | (367)  |
| 1985 | (624)  | 1909 | (547)  |
| 2052 | (1337) | 1943 | (1157) |
| 3214 | (0)    | 3139 | (1)    |
| 3215 | (1)    | 3141 | (1)    |
| 3219 | (0)    | 3147 | (1)    |
| 3222 | (0)    | 3150 | (0)    |
| 3229 | (0)    | 3156 | (1)    |
| 3231 | (0)    | 3157 | (0)    |
| 3237 | (1)    | 3164 | (1)    |
| 3240 | (1)    | 3165 | (1)    |

Table S15. Harmonic vibrational frequencies (in  $\text{cm}^{-1}$ ) and infrared intensities (in parentheses, in  $\text{km/mol}$ ) for the structure 3T-1 of  $(\text{C}_4\text{H}_4\text{P})_2\text{Mn}_2(\text{CO})_3$  with  $C_s$  symmetry.

|   | <b>B3LYP</b> |      |    | <b>BP86</b> |      |
|---|--------------|------|----|-------------|------|
| a | 27           | (0)  | A' | 73          | (1)  |
|   | 56           | (2)  |    | 84          | (1)  |
|   | 64           | (0)  |    | 99          | (0)  |
|   | 75           | (1)  |    | 147         | (0)  |
|   | 93           | (0)  |    | 214         | (13) |
|   | 97           | (0)  |    | 227         | (2)  |
|   | 102          | (1)  |    | 268         | (2)  |
|   | 112          | (1)  |    | 285         | (5)  |
|   | 132          | (0)  |    | 342         | (1)  |
|   | 147          | (1)  |    | 362         | (4)  |
|   | 184          | (3)  |    | 412         | (11) |
|   | 196          | (0)  |    | 416         | (9)  |
|   | 260          | (2)  |    | 520         | (10) |
|   | 266          | (1)  |    | 530         | (17) |
|   | 291          | (2)  |    | 538         | (47) |
|   | 301          | (4)  |    | 573         | (64) |
|   | 303          | (6)  |    | 589         | (85) |
|   | 349          | (3)  |    | 614         | (37) |
|   | 406          | (33) |    | 651         | (41) |
|   | 434          | (4)  |    | 758         | (46) |
|   | 446          | (6)  |    | 788         | (10) |
|   | 451          | (2)  |    | 804         | (5)  |
|   | 499          | (11) |    | 818         | (15) |
|   | 509          | (8)  |    | 837         | (2)  |
|   | 513          | (30) |    | 844         | (0)  |
|   | 541          | (14) |    | 989         | (4)  |
|   | 546          | (44) |    | 1009        | (4)  |

---

|      |        |     |      |        |
|------|--------|-----|------|--------|
| 557  | (1)    |     | 1045 | (3)    |
| 563  | (12)   |     | 1053 | (1)    |
| 569  | (3)    |     | 1268 | (12)   |
| 575  | (15)   |     | 1282 | (8)    |
| 599  | (37)   |     | 1344 | (2)    |
| 652  | (46)   |     | 1390 | (0)    |
| 683  | (4)    |     | 1906 | (1796) |
| 695  | (5)    |     | 1959 | (849)  |
| 773  | (28)   |     | 3153 | (0)    |
| 787  | (5)    |     | 3161 | (1)    |
| 799  | (7)    |     | 3167 | (1)    |
| 809  | (44)   |     | 3176 | (1)    |
| 820  | (26)   | A'' | 23   | (1)    |
| 842  | (25)   |     | 53   | (0)    |
| 852  | (2)    |     | 74   | (0)    |
| 854  | (4)    |     | 108  | (0)    |
| 888  | (1)    |     | 145  | (0)    |
| 927  | (1)    |     | 181  | (1)    |
| 933  | (2)    |     | 288  | (3)    |
| 948  | (1)    |     | 340  | (4)    |
| 1040 | (4)    |     | 409  | (2)    |
| 1044 | (2)    |     | 463  | (2)    |
| 1071 | (7)    |     | 514  | (1)    |
| 1079 | (10)   |     | 533  | (1)    |
| 1089 | (2)    |     | 538  | (1)    |
| 1090 | (2)    |     | 585  | (35)   |
| 1258 | (2)    |     | 679  | (1)    |
| 1262 | (5)    |     | 698  | (0)    |
| 1314 | (1)    |     | 748  | (0)    |
| 1346 | (0)    |     | 773  | (9)    |
| 1426 | (2)    |     | 823  | (0)    |
| 1429 | (2)    |     | 838  | (2)    |
| 1445 | (2)    |     | 867  | (8)    |
| 1464 | (1)    |     | 888  | (0)    |
| 1979 | (1134) |     | 1021 | (6)    |
| 2007 | (1172) |     | 1024 | (9)    |
| 2047 | (1016) |     | 1201 | (1)    |
| 3208 | (0)    |     | 1205 | (5)    |
| 3215 | (1)    |     | 1360 | (1)    |
| 3222 | (1)    |     | 1378 | (0)    |
| 3226 | (0)    |     | 1919 | (738)  |
| 3232 | (0)    |     | 3147 | (1)    |
| 3238 | (0)    |     | 3151 | (0)    |
| 3239 | (2)    |     | 3162 | (0)    |

---

|      |     |      |     |
|------|-----|------|-----|
| 3242 | (1) | 3173 | (0) |
|------|-----|------|-----|

Table S16. Harmonic vibrational frequencies (in  $\text{cm}^{-1}$ ) and infrared intensities (in parentheses, in  $\text{km/mol}$ ) for the structure 3T-2 of  $(\text{C}_4\text{H}_4\text{P})_2\text{Mn}_2(\text{CO})_3$  with  $C_1$  symmetry.

| B3LYP |     |      | BP86 |     |      |
|-------|-----|------|------|-----|------|
| a     | 35  | (0)  | a    | 29  | (0)  |
|       | 48  | (0)  |      | 52  | (1)  |
|       | 48  | (0)  |      | 57  | (0)  |
|       | 70  | (0)  |      | 74  | (0)  |
|       | 85  | (0)  |      | 92  | (0)  |
|       | 98  | (1)  |      | 99  | (0)  |
|       | 100 | (0)  |      | 102 | (0)  |
|       | 107 | (1)  |      | 111 | (0)  |
|       | 122 | (0)  |      | 130 | (0)  |
|       | 132 | (0)  |      | 141 | (1)  |
|       | 143 | (1)  |      | 147 | (1)  |
|       | 164 | (2)  |      | 184 | (1)  |
|       | 230 | (2)  |      | 255 | (3)  |
|       | 271 | (1)  |      | 290 | (4)  |
|       | 287 | (2)  |      | 296 | (2)  |
|       | 295 | (2)  |      | 305 | (3)  |
|       | 315 | (3)  |      | 335 | (1)  |
|       | 349 | (8)  |      | 361 | (7)  |
|       | 392 | (13) |      | 403 | (10) |
|       | 440 | (4)  |      | 423 | (2)  |
|       | 443 | (1)  |      | 428 | (13) |
|       | 452 | (2)  |      | 434 | (2)  |
|       | 476 | (9)  |      | 485 | (11) |
|       | 491 | (2)  |      | 494 | (4)  |
|       | 506 | (24) |      | 516 | (4)  |
|       | 518 | (10) |      | 526 | (9)  |
|       | 551 | (33) |      | 530 | (2)  |
|       | 556 | (9)  |      | 540 | (2)  |
|       | 559 | (14) |      | 546 | (7)  |
|       | 570 | (8)  |      | 564 | (13) |
|       | 584 | (5)  |      | 567 | (23) |
|       | 592 | (44) |      | 578 | (61) |
|       | 648 | (47) |      | 638 | (36) |
|       | 689 | (3)  |      | 660 | (5)  |
|       | 692 | (5)  |      | 667 | (3)  |
|       | 794 | (15) |      | 765 | (2)  |
|       | 795 | (3)  |      | 768 | (8)  |
|       | 802 | (42) |      | 774 | (41) |
|       | 810 | (25) |      | 778 | (15) |

|      |        |      |        |
|------|--------|------|--------|
| 824  | (27)   | 780  | (21)   |
| 832  | (24)   | 795  | (29)   |
| 847  | (4)    | 815  | (5)    |
| 852  | (4)    | 817  | (1)    |
| 895  | (1)    | 851  | (2)    |
| 919  | (2)    | 871  | (3)    |
| 927  | (1)    | 879  | (2)    |
| 945  | (1)    | 893  | (1)    |
| 1043 | (2)    | 1012 | (2)    |
| 1045 | (6)    | 1015 | (6)    |
| 1074 | (6)    | 1040 | (6)    |
| 1078 | (2)    | 1041 | (0)    |
| 1086 | (3)    | 1051 | (2)    |
| 1092 | (1)    | 1055 | (1)    |
| 1260 | (5)    | 1204 | (6)    |
| 1262 | (6)    | 1210 | (6)    |
| 1334 | (14)   | 1292 | (5)    |
| 1343 | (4)    | 1298 | (13)   |
| 1424 | (1)    | 1379 | (1)    |
| 1425 | (10)   | 1384 | (6)    |
| 1450 | (2)    | 1398 | (1)    |
| 1454 | (1)    | 1400 | (1)    |
| 1925 | (538)  | 1867 | (395)  |
| 1992 | (647)  | 1902 | (516)  |
| 2050 | (1325) | 1962 | (1084) |
| 3204 | (1)    | 3130 | (0)    |
| 3214 | (1)    | 3140 | (1)    |
| 3217 | (1)    | 3143 | (1)    |
| 3224 | (0)    | 3150 | (0)    |
| 3229 | (0)    | 3158 | (0)    |
| 3234 | (2)    | 3162 | (1)    |
| 3235 | (0)    | 3163 | (1)    |
| 3241 | (1)    | 3168 | (1)    |

Table S17. Harmonic vibrational frequencies (in  $\text{cm}^{-1}$ ) and infrared intensities (in parentheses, in  $\text{km/mol}$ ) for the structure 3T-3 of  $(\text{C}_4\text{H}_4\text{P})_2\text{Mn}_2(\text{CO})_3$  with  $C_1$  symmetry.

| B3LYP |    |     | BP86 |     |     |
|-------|----|-----|------|-----|-----|
| a     | 27 | (1) | a    | 23  | (1) |
|       | 48 | (1) |      | 51  | (1) |
|       | 55 | (0) |      | 57  | (0) |
|       | 67 | (1) |      | 66  | (1) |
|       | 84 | (1) |      | 89  | (0) |
|       | 97 | (0) |      | 96  | (1) |
|       | 99 | (1) |      | 101 | (0) |

---

|      |      |      |      |
|------|------|------|------|
| 107  | (1)  | 107  | (0)  |
| 126  | (1)  | 130  | (1)  |
| 139  | (0)  | 142  | (1)  |
| 151  | (2)  | 166  | (2)  |
| 163  | (2)  | 183  | (2)  |
| 223  | (2)  | 256  | (3)  |
| 250  | (1)  | 283  | (2)  |
| 290  | (1)  | 298  | (5)  |
| 297  | (3)  | 312  | (3)  |
| 328  | (6)  | 338  | (7)  |
| 347  | (9)  | 366  | (3)  |
| 385  | (12) | 406  | (1)  |
| 443  | (2)  | 420  | (14) |
| 444  | (1)  | 424  | (17) |
| 453  | (2)  | 429  | (3)  |
| 473  | (4)  | 482  | (7)  |
| 489  | (2)  | 491  | (5)  |
| 495  | (22) | 519  | (4)  |
| 515  | (20) | 522  | (6)  |
| 550  | (12) | 528  | (12) |
| 554  | (26) | 538  | (2)  |
| 559  | (26) | 544  | (9)  |
| 568  | (3)  | 562  | (22) |
| 592  | (6)  | 570  | (13) |
| 594  | (44) | 575  | (54) |
| 649  | (46) | 635  | (36) |
| 691  | (5)  | 664  | (4)  |
| 697  | (4)  | 675  | (1)  |
| 785  | (4)  | 762  | (3)  |
| 794  | (2)  | 768  | (6)  |
| 800  | (74) | 777  | (21) |
| 819  | (38) | 780  | (58) |
| 821  | (9)  | 788  | (14) |
| 829  | (21) | 789  | (17) |
| 849  | (5)  | 817  | (4)  |
| 849  | (2)  | 819  | (2)  |
| 901  | (3)  | 851  | (3)  |
| 922  | (2)  | 873  | (4)  |
| 928  | (1)  | 887  | (1)  |
| 947  | (1)  | 897  | (1)  |
| 1031 | (5)  | 1008 | (5)  |
| 1043 | (2)  | 1012 | (2)  |
| 1076 | (3)  | 1039 | (7)  |
| 1078 | (5)  | 1040 | (2)  |

---

|      |        |      |        |
|------|--------|------|--------|
| 1088 | (2)    | 1053 | (1)    |
| 1090 | (1)    | 1053 | (1)    |
| 1260 | (5)    | 1204 | (5)    |
| 1264 | (6)    | 1211 | (7)    |
| 1342 | (3)    | 1290 | (4)    |
| 1348 | (10)   | 1296 | (8)    |
| 1410 | (6)    | 1368 | (0)    |
| 1425 | (3)    | 1379 | (2)    |
| 1451 | (2)    | 1398 | (0)    |
| 1455 | (1)    | 1400 | (1)    |
| 1914 | (590)  | 1857 | (439)  |
| 1992 | (650)  | 1902 | (512)  |
| 2048 | (1375) | 1960 | (1144) |
| 3210 | (0)    | 3138 | (0)    |
| 3217 | (1)    | 3143 | (1)    |
| 3217 | (0)    | 3144 | (0)    |
| 3226 | (0)    | 3152 | (0)    |
| 3228 | (0)    | 3156 | (0)    |
| 3235 | (1)    | 3162 | (1)    |
| 3236 | (0)    | 3164 | (1)    |
| 3242 | (1)    | 3169 | (1)    |

Table S18. Harmonic vibrational frequencies (in  $\text{cm}^{-1}$ ) and infrared intensities (in parentheses, in  $\text{km/mol}$ ) for the structure 3T-4 of  $(\text{C}_4\text{H}_4\text{P})_2\text{Mn}_2(\text{CO})_3$  with  $\text{C}_1$  symmetry.

| <b>B3LYP</b> |     |     | <b>BP86</b> |     |     |
|--------------|-----|-----|-------------|-----|-----|
| a            | 29  | (2) | a           | 29  | (1) |
|              | 33  | (0) |             | 42  | (0) |
|              | 47  | (0) |             | 55  | (0) |
|              | 57  | (1) |             | 72  | (1) |
|              | 79  | (1) |             | 92  | (0) |
|              | 87  | (0) |             | 97  | (0) |
|              | 108 | (0) |             | 116 | (1) |
|              | 119 | (3) |             | 120 | (3) |
|              | 128 | (0) |             | 131 | (0) |
|              | 134 | (0) |             | 153 | (0) |
|              | 141 | (0) |             | 166 | (1) |
|              | 165 | (1) |             | 182 | (1) |
|              | 257 | (1) |             | 277 | (8) |
|              | 278 | (3) |             | 283 | (4) |
|              | 283 | (2) |             | 299 | (2) |
|              | 304 | (1) |             | 310 | (3) |
|              | 314 | (1) |             | 329 | (7) |
|              | 338 | (1) |             | 368 | (4) |
|              | 397 | (3) |             | 378 | (2) |

---

|      |        |      |       |
|------|--------|------|-------|
| 423  | (11)   | 390  | (3)   |
| 453  | (2)    | 436  | (6)   |
| 460  | (58)   | 436  | (7)   |
| 469  | (2)    | 457  | (81)  |
| 479  | (9)    | 487  | (1)   |
| 490  | (8)    | 498  | (26)  |
| 535  | (30)   | 523  | (10)  |
| 538  | (36)   | 531  | (4)   |
| 547  | (35)   | 539  | (12)  |
| 561  | (2)    | 550  | (77)  |
| 571  | (10)   | 552  | (17)  |
| 586  | (3)    | 564  | (3)   |
| 593  | (4)    | 579  | (16)  |
| 609  | (29)   | 602  | (16)  |
| 689  | (4)    | 670  | (2)   |
| 700  | (1)    | 676  | (2)   |
| 810  | (63)   | 775  | (18)  |
| 813  | (4)    | 784  | (12)  |
| 814  | (8)    | 794  | (9)   |
| 823  | (5)    | 796  | (17)  |
| 841  | (30)   | 813  | (23)  |
| 851  | (12)   | 815  | (2)   |
| 851  | (1)    | 819  | (1)   |
| 855  | (3)    | 829  | (4)   |
| 895  | (1)    | 854  | (2)   |
| 928  | (5)    | 881  | (4)   |
| 933  | (0)    | 888  | (1)   |
| 948  | (1)    | 898  | (1)   |
| 1052 | (2)    | 1018 | (5)   |
| 1052 | (6)    | 1026 | (3)   |
| 1068 | (4)    | 1039 | (3)   |
| 1075 | (3)    | 1041 | (3)   |
| 1086 | (1)    | 1050 | (1)   |
| 1090 | (3)    | 1055 | (2)   |
| 1260 | (6)    | 1208 | (8)   |
| 1264 | (5)    | 1213 | (7)   |
| 1313 | (4)    | 1275 | (13)  |
| 1343 | (8)    | 1298 | (6)   |
| 1425 | (1)    | 1377 | (2)   |
| 1428 | (1)    | 1384 | (1)   |
| 1439 | (1)    | 1387 | (0)   |
| 1445 | (1)    | 1396 | (0)   |
| 1938 | (1018) | 1834 | (625) |
| 1958 | (594)  | 1867 | (626) |

---



|      |       |      |       |
|------|-------|------|-------|
| 2017 | (397) | 1900 | (216) |
| 3207 | (1)   | 3132 | (0)   |
| 3217 | (0)   | 3141 | (0)   |
| 3218 | (0)   | 3142 | (0)   |
| 3221 | (1)   | 3146 | (0)   |
| 3226 | (0)   | 3155 | (0)   |
| 3231 | (0)   | 3155 | (0)   |
| 3234 | (1)   | 3161 | (1)   |
| 3241 | (0)   | 3164 | (0)   |

Table S19. Harmonic vibrational frequencies (in  $\text{cm}^{-1}$ ) and infrared intensities (in parentheses, in  $\text{km/mol}$ ) for the structure 3T-5 of  $(\text{C}_4\text{H}_4\text{P})_2\text{Mn}_2(\text{CO})_3$  with  $C_1$  symmetry.

| B3LYP |     |      | BP86 |     |       |
|-------|-----|------|------|-----|-------|
| a     | 28  | (1)  | a    | 27  | (1)   |
|       | 35  | (0)  |      | 34  | (1)   |
|       | 41  | (0)  |      | 46  | (1)   |
|       | 56  | (0)  |      | 60  | (1)   |
|       | 77  | (0)  |      | 91  | (1)   |
|       | 84  | (1)  |      | 95  | (1)   |
|       | 105 | (0)  |      | 117 | (0)   |
|       | 114 | (1)  |      | 125 | (2)   |
|       | 121 | (1)  |      | 144 | (0)   |
|       | 141 | (1)  |      | 171 | (0)   |
|       | 144 | (0)  |      | 192 | (2)   |
|       | 161 | (0)  |      | 204 | (1)   |
|       | 232 | (2)  |      | 252 | (7)   |
|       | 267 | (0)  |      | 284 | (6)   |
|       | 277 | (1)  |      | 304 | (5)   |
|       | 295 | (5)  |      | 318 | (1)   |
|       | 310 | (2)  |      | 339 | (1)   |
|       | 346 | (2)  |      | 379 | (1)   |
|       | 393 | (7)  |      | 389 | (1)   |
|       | 434 | (6)  |      | 410 | (3)   |
|       | 452 | (34) |      | 427 | (0)   |
|       | 455 | (23) |      | 435 | (4)   |
|       | 466 | (11) |      | 452 | (7)   |
|       | 469 | (2)  |      | 477 | (48)  |
|       | 490 | (4)  |      | 502 | (4)   |
|       | 527 | (21) |      | 515 | (17)  |
|       | 535 | (25) |      | 524 | (8)   |
|       | 552 | (39) |      | 537 | (10)  |
|       | 561 | (3)  |      | 542 | (9)   |
|       | 572 | (5)  |      | 557 | (147) |
|       | 584 | (6)  |      | 565 | (5)   |

|      |        |      |       |
|------|--------|------|-------|
| 590  | (6)    | 567  | (10)  |
| 609  | (37)   | 593  | (22)  |
| 690  | (4)    | 673  | (7)   |
| 701  | (1)    | 684  | (0)   |
| 796  | (21)   | 776  | (4)   |
| 805  | (13)   | 786  | (11)  |
| 813  | (34)   | 792  | (23)  |
| 816  | (19)   | 792  | (9)   |
| 845  | (30)   | 815  | (18)  |
| 850  | (16)   | 820  | (2)   |
| 852  | (3)    | 822  | (16)  |
| 855  | (4)    | 827  | (4)   |
| 899  | (1)    | 858  | (1)   |
| 931  | (2)    | 884  | (5)   |
| 933  | (1)    | 896  | (1)   |
| 943  | (2)    | 906  | (1)   |
| 1043 | (4)    | 1019 | (6)   |
| 1047 | (5)    | 1023 | (4)   |
| 1075 | (6)    | 1040 | (3)   |
| 1079 | (3)    | 1045 | (3)   |
| 1086 | (3)    | 1053 | (1)   |
| 1091 | (2)    | 1058 | (1)   |
| 1262 | (6)    | 1210 | (8)   |
| 1266 | (4)    | 1217 | (5)   |
| 1329 | (14)   | 1282 | (17)  |
| 1353 | (4)    | 1303 | (6)   |
| 1424 | (1)    | 1384 | (4)   |
| 1427 | (4)    | 1389 | (1)   |
| 1445 | (3)    | 1392 | (0)   |
| 1446 | (2)    | 1396 | (1)   |
| 1939 | (1078) | 1803 | (832) |
| 1955 | (621)  | 1821 | (216) |
| 2011 | (359)  | 1915 | (452) |
| 3206 | (0)    | 3129 | (0)   |
| 3215 | (0)    | 3140 | (1)   |
| 3216 | (0)    | 3143 | (0)   |
| 3222 | (0)    | 3146 | (0)   |
| 3228 | (0)    | 3156 | (0)   |
| 3232 | (0)    | 3158 | (0)   |
| 3234 | (1)    | 3161 | (1)   |
| 3239 | (1)    | 3163 | (1)   |

Table S20. Harmonic vibrational frequencies (in  $\text{cm}^{-1}$ ) and infrared intensities (in parentheses, in

km/mol) for the structure 2T-1 of  $(C_4H_4P)_2Mn_2(CO)_2$  with  $C_2$  symmetry.

| <b>B3LYP</b> |      |        | <b>BP86</b> |      |        |
|--------------|------|--------|-------------|------|--------|
| a            | 47   | (0)    | a           | 54   | (0)    |
|              | 67   | (0)    |             | 65   | (0)    |
|              | 102  | (0)    |             | 106  | (0)    |
|              | 118  | (1)    |             | 121  | (1)    |
|              | 150  | (0)    |             | 150  | (0)    |
|              | 226  | (0)    |             | 237  | (0)    |
|              | 305  | (0)    |             | 317  | (3)    |
|              | 316  | (8)    |             | 323  | (7)    |
|              | 353  | (1)    |             | 364  | (1)    |
|              | 429  | (3)    |             | 402  | (0)    |
|              | 466  | (1)    |             | 461  | (1)    |
|              | 542  | (48)   |             | 527  | (0)    |
|              | 551  | (0)    |             | 543  | (1)    |
|              | 561  | (0)    |             | 554  | (46)   |
|              | 591  | (0)    |             | 577  | (2)    |
|              | 693  | (1)    |             | 665  | (0)    |
|              | 791  | (3)    |             | 754  | (2)    |
|              | 806  | (9)    |             | 778  | (11)   |
|              | 818  | (0)    |             | 787  | (0)    |
|              | 857  | (1)    |             | 821  | (0)    |
|              | 885  | (1)    |             | 839  | (2)    |
|              | 933  | (5)    |             | 884  | (2)    |
|              | 1044 | (1)    |             | 1007 | (1)    |
|              | 1065 | (15)   |             | 1027 | (14)   |
|              | 1088 | (1)    |             | 1052 | (0)    |
|              | 1256 | (5)    |             | 1199 | (4)    |
|              | 1314 | (3)    |             | 1265 | (3)    |
|              | 1426 | (0)    |             | 1373 | (1)    |
|              | 1441 | (0)    |             | 1393 | (0)    |
|              | 2006 | (1388) |             | 1921 | (1098) |
|              | 3204 | (1)    |             | 3126 | (1)    |
|              | 3228 | (0)    |             | 3153 | (0)    |
|              | 3237 | (0)    |             | 3162 | (0)    |
|              | 3242 | (1)    |             | 3168 | (2)    |
| b            | 73   | (0)    | b           | 71   | (0)    |
|              | 100  | (0)    |             | 98   | (0)    |
|              | 162  | (2)    |             | 161  | (1)    |
|              | 207  | (1)    |             | 217  | (3)    |
|              | 310  | (1)    |             | 322  | (4)    |
|              | 318  | (5)    |             | 331  | (4)    |
|              | 365  | (8)    |             | 375  | (13)   |
|              | 421  | (6)    |             | 402  | (5)    |

|      |       |      |       |
|------|-------|------|-------|
| 475  | (3)   | 470  | (4)   |
| 533  | (22)  | 524  | (0)   |
| 559  | (5)   | 549  | (15)  |
| 570  | (62)  | 555  | (30)  |
| 585  | (4)   | 575  | (23)  |
| 690  | (2)   | 660  | (2)   |
| 786  | (15)  | 752  | (11)  |
| 808  | (15)  | 779  | (10)  |
| 819  | (45)  | 788  | (44)  |
| 859  | (0)   | 822  | (1)   |
| 884  | (2)   | 838  | (2)   |
| 934  | (1)   | 885  | (2)   |
| 1042 | (9)   | 1005 | (9)   |
| 1063 | (3)   | 1024 | (3)   |
| 1087 | (1)   | 1051 | (0)   |
| 1253 | (2)   | 1195 | (1)   |
| 1310 | (4)   | 1261 | (3)   |
| 1426 | (5)   | 1372 | (1)   |
| 1440 | (2)   | 1392 | (1)   |
| 1974 | (988) | 1895 | (721) |
| 3203 | (2)   | 3126 | (2)   |
| 3228 | (0)   | 3153 | (1)   |
| 3235 | (0)   | 3160 | (1)   |
| 3242 | (1)   | 3168 | (1)   |

Table S 21. Harmonic vibrational frequencies (in  $\text{cm}^{-1}$ ) and infrared intensities (in parentheses, in  $\text{km/mol}$ ) for the structure 2T-2 of  $(\text{C}_4\text{H}_4\text{P})_2\text{Mn}_2(\text{CO})_2$  with  $C_1$  symmetry.

| B3LYP |     |      | BP86 |     |     |
|-------|-----|------|------|-----|-----|
| a     | 33  | (1)  | a    | 33  | (1) |
|       | 34  | (0)  |      | 42  | (0) |
|       | 48  | (1)  |      | 55  | (0) |
|       | 56  | (1)  |      | 67  | (1) |
|       | 77  | (5)  |      | 82  | (1) |
|       | 91  | (0)  |      | 87  | (0) |
|       | 105 | (3)  |      | 94  | (0) |
|       | 108 | (2)  |      | 114 | (0) |
|       | 137 | (2)  |      | 152 | (5) |
|       | 155 | (1)  |      | 189 | (1) |
|       | 228 | (2)  |      | 266 | (1) |
|       | 232 | (13) |      | 294 | (5) |
|       | 263 | (14) |      | 307 | (2) |
|       | 279 | (6)  |      | 320 | (5) |
|       | 296 | (4)  |      | 330 | (5) |
|       | 322 | (1)  |      | 393 | (8) |

---

|      |        |      |       |
|------|--------|------|-------|
| 360  | (3)    | 412  | (0)   |
| 413  | (18)   | 423  | (6)   |
| 432  | (21)   | 432  | (4)   |
| 450  | (57)   | 478  | (3)   |
| 457  | (18)   | 512  | (24)  |
| 467  | (3)    | 520  | (2)   |
| 528  | (35)   | 528  | (21)  |
| 551  | (20)   | 541  | (9)   |
| 562  | (3)    | 549  | (3)   |
| 564  | (6)    | 559  | (13)  |
| 574  | (3)    | 572  | (27)  |
| 615  | (39)   | 638  | (30)  |
| 682  | (14)   | 661  | (1)   |
| 687  | (0)    | 671  | (0)   |
| 782  | (23)   | 759  | (16)  |
| 786  | (15)   | 766  | (17)  |
| 792  | (15)   | 768  | (6)   |
| 801  | (15)   | 772  | (24)  |
| 805  | (6)    | 776  | (26)  |
| 811  | (50)   | 781  | (17)  |
| 836  | (2)    | 804  | (1)   |
| 852  | (1)    | 819  | (2)   |
| 863  | (3)    | 832  | (1)   |
| 894  | (0)    | 851  | (3)   |
| 917  | (1)    | 881  | (2)   |
| 934  | (1)    | 882  | (1)   |
| 1035 | (5)    | 1005 | (6)   |
| 1044 | (5)    | 1017 | (4)   |
| 1066 | (9)    | 1035 | (4)   |
| 1070 | (10)   | 1036 | (5)   |
| 1079 | (7)    | 1050 | (1)   |
| 1088 | (1)    | 1054 | (1)   |
| 1252 | (11)   | 1198 | (6)   |
| 1256 | (6)    | 1205 | (7)   |
| 1299 | (32)   | 1269 | (13)  |
| 1317 | (4)    | 1278 | (4)   |
| 1416 | (5)    | 1368 | (0)   |
| 1424 | (15)   | 1380 | (3)   |
| 1430 | (1)    | 1387 | (1)   |
| 1439 | (3)    | 1396 | (1)   |
| 1945 | (985)  | 1894 | (707) |
| 1998 | (1930) | 1940 | (890) |
| 3202 | (1)    | 3127 | (1)   |
| 3211 | (0)    | 3141 | (0)   |

---

|      |     |      |     |
|------|-----|------|-----|
| 3213 | (0) | 3143 | (1) |
| 3219 | (1) | 3149 | (0) |
| 3225 | (0) | 3152 | (0) |
| 3229 | (1) | 3156 | (1) |
| 3236 | (0) | 3163 | (0) |
| 3242 | (0) | 3168 | (1) |

Table S 22. Harmonic vibrational frequencies (in  $\text{cm}^{-1}$ ) and infrared intensities (in parentheses, in  $\text{km/mol}$ ) for the structure 2T-3 of  $(\text{C}_4\text{H}_4\text{P})_2\text{Mn}_2(\text{CO})_2$  with  $C_s$  symmetry.

| B3LYP |      |        | BP86 |      |       |
|-------|------|--------|------|------|-------|
| A'    | 36   | (1)    | A'   | 36   | (1)   |
|       | 49   | (2)    |      | 54   | (2)   |
|       | 84   | (1)    |      | 89   | (2)   |
|       | 103  | (0)    |      | 105  | (1)   |
|       | 183  | (0)    |      | 187  | (0)   |
|       | 294  | (6)    |      | 301  | (7)   |
|       | 307  | (6)    |      | 310  | (8)   |
|       | 417  | (3)    |      | 416  | (0)   |
|       | 431  | (1)    |      | 422  | (4)   |
|       | 453  | (2)    |      | 476  | (52)  |
|       | 485  | (0)    |      | 489  | (0)   |
|       | 528  | (15)   |      | 528  | (1)   |
|       | 529  | (10)   |      | 531  | (1)   |
|       | 563  | (1)    |      | 538  | (7)   |
|       | 590  | (4)    |      | 569  | (2)   |
|       | 700  | (3)    |      | 679  | (2)   |
|       | 816  | (2)    |      | 790  | (2)   |
|       | 824  | (4)    |      | 794  | (7)   |
|       | 832  | (6)    |      | 800  | (6)   |
|       | 852  | (1)    |      | 821  | (3)   |
|       | 904  | (4)    |      | 861  | (8)   |
|       | 942  | (1)    |      | 894  | (1)   |
|       | 1054 | (8)    |      | 1022 | (8)   |
|       | 1072 | (9)    |      | 1039 | (8)   |
|       | 1091 | (0)    |      | 1057 | (1)   |
|       | 1263 | (12)   |      | 1211 | (13)  |
|       | 1327 | (12)   |      | 1288 | (10)  |
|       | 1433 | (1)    |      | 1382 | (1)   |
|       | 1444 | (1)    |      | 1399 | (1)   |
|       | 1895 | (1133) |      | 1803 | (855) |
|       | 1919 | (262)  |      | 1823 | (185) |
|       | 3208 | (0)    |      | 3136 | (0)   |
|       | 3217 | (0)    |      | 3140 | (0)   |

|     |      |      |     |      |      |
|-----|------|------|-----|------|------|
|     | 3230 | (0)  |     | 3155 | (0)  |
|     | 3236 | (2)  |     | 3161 | (2)  |
| A'' | 11   | (0)  | A'' | 31   | (0)  |
|     | 113  | (2)  |     | 119  | (1)  |
|     | 120  | (0)  |     | 137  | (0)  |
|     | 167  | (0)  |     | 185  | (0)  |
|     | 186  | (0)  |     | 202  | (1)  |
|     | 279  | (2)  |     | 295  | (5)  |
|     | 316  | (8)  |     | 339  | (2)  |
|     | 334  | (1)  |     | 344  | (1)  |
|     | 413  | (34) |     | 409  | (2)  |
|     | 431  | (2)  |     | 434  | (1)  |
|     | 444  | (4)  |     | 438  | (1)  |
|     | 561  | (3)  |     | 535  | (8)  |
|     | 588  | (1)  |     | 565  | (0)  |
|     | 699  | (1)  |     | 676  | (0)  |
|     | 815  | (42) |     | 788  | (22) |
|     | 824  | (13) |     | 793  | (2)  |
|     | 829  | (41) |     | 797  | (43) |
|     | 851  | (3)  |     | 821  | (1)  |
|     | 904  | (0)  |     | 860  | (0)  |
|     | 941  | (1)  |     | 894  | (1)  |
|     | 1054 | (2)  |     | 1022 | (3)  |
|     | 1072 | (0)  |     | 1038 | (0)  |
|     | 1091 | (0)  |     | 1057 | (0)  |
|     | 1263 | (0)  |     | 1210 | (0)  |
|     | 1327 | (2)  |     | 1288 | (2)  |
|     | 1432 | (1)  |     | 1381 | (0)  |
|     | 1444 | (1)  |     | 1399 | (1)  |
|     | 3208 | (0)  |     | 3136 | (0)  |
|     | 3217 | (0)  |     | 3140 | (0)  |
|     | 3230 | (0)  |     | 3154 | (0)  |
|     | 3236 | (0)  |     | 3161 | (0)  |

Table S23. Harmonic vibrational frequencies (in  $\text{cm}^{-1}$ ) and infrared intensities (in parentheses, in  $\text{km/mol}$ ) for the structure 2S-1 of  $(\text{C}_4\text{H}_4\text{P})_2\text{Mn}_2(\text{CO})_2$  with  $\text{C}_1$  symmetry.

| B3LYP |     |     | BP86 |     |     |
|-------|-----|-----|------|-----|-----|
| a     | 28  | (1) | a    | 24  | (1) |
|       | 33  | (0) |      | 33  | (0) |
|       | 53  | (1) |      | 49  | (2) |
|       | 85  | (0) |      | 99  | (0) |
|       | 96  | (1) |      | 103 | (1) |
|       | 104 | (0) |      | 128 | (0) |

---

|      |      |      |      |
|------|------|------|------|
| 110  | (0)  | 135  | (0)  |
| 144  | (0)  | 140  | (0)  |
| 174  | (0)  | 186  | (2)  |
| 192  | (0)  | 210  | (0)  |
| 297  | (4)  | 279  | (1)  |
| 322  | (3)  | 297  | (9)  |
| 327  | (6)  | 311  | (8)  |
| 336  | (1)  | 338  | (8)  |
| 351  | (3)  | 373  | (5)  |
| 379  | (2)  | 392  | (1)  |
| 435  | (1)  | 403  | (1)  |
| 449  | (1)  | 424  | (4)  |
| 452  | (1)  | 438  | (1)  |
| 494  | (10) | 461  | (0)  |
| 509  | (52) | 477  | (35) |
| 537  | (39) | 494  | (2)  |
| 553  | (0)  | 524  | (5)  |
| 562  | (8)  | 531  | (0)  |
| 565  | (13) | 537  | (12) |
| 570  | (10) | 568  | (4)  |
| 580  | (1)  | 570  | (4)  |
| 592  | (4)  | 581  | (17) |
| 684  | (1)  | 675  | (1)  |
| 702  | (2)  | 682  | (1)  |
| 789  | (11) | 777  | (16) |
| 810  | (36) | 789  | (11) |
| 813  | (10) | 791  | (8)  |
| 825  | (10) | 795  | (9)  |
| 833  | (13) | 800  | (5)  |
| 839  | (15) | 801  | (15) |
| 848  | (4)  | 818  | (0)  |
| 851  | (1)  | 824  | (0)  |
| 905  | (4)  | 849  | (3)  |
| 911  | (5)  | 858  | (3)  |
| 925  | (2)  | 873  | (1)  |
| 933  | (1)  | 876  | (0)  |
| 1047 | (11) | 1017 | (7)  |
| 1048 | (5)  | 1022 | (9)  |
| 1070 | (6)  | 1032 | (3)  |
| 1071 | (2)  | 1040 | (3)  |
| 1084 | (2)  | 1050 | (0)  |
| 1089 | (4)  | 1051 | (2)  |
| 1257 | (6)  | 1208 | (6)  |
| 1259 | (5)  | 1208 | (8)  |

---



|      |       |      |       |
|------|-------|------|-------|
| 1332 | (7)   | 1281 | (11)  |
| 1339 | (4)   | 1293 | (13)  |
| 1418 | (6)   | 1370 | (1)   |
| 1427 | (0)   | 1380 | (0)   |
| 1433 | (0)   | 1389 | (4)   |
| 1449 | (2)   | 1393 | (0)   |
| 1934 | (810) | 1820 | (920) |
| 1978 | (738) | 1838 | (198) |
| 3198 | (1)   | 3130 | (0)   |
| 3206 | (0)   | 3135 | (0)   |
| 3216 | (1)   | 3143 | (0)   |
| 3216 | (0)   | 3145 | (0)   |
| 3223 | (2)   | 3152 | (0)   |
| 3227 | (0)   | 3156 | (0)   |
| 3233 | (2)   | 3158 | (1)   |
| 3237 | (0)   | 3160 | (1)   |

Table S24. Harmonic vibrational frequencies (in  $\text{cm}^{-1}$ ) and infrared intensities (in parentheses, in  $\text{km/mol}$ ) for the structure 2S-2 of  $(\text{C}_4\text{H}_4\text{P})_2\text{Mn}_2(\text{CO})_2$  with  $\text{C}_1$  symmetry.

| B3LYP |     |      | BP86 |     |      |
|-------|-----|------|------|-----|------|
| a     | 27  | (1)  | a    | 22  | (1)  |
|       | 38  | (0)  |      | 34  | (0)  |
|       | 40  | (0)  |      | 49  | (1)  |
|       | 89  | (1)  |      | 99  | (1)  |
|       | 101 | (1)  |      | 102 | (1)  |
|       | 132 | (0)  |      | 133 | (0)  |
|       | 139 | (2)  |      | 140 | (0)  |
|       | 154 | (0)  |      | 156 | (0)  |
|       | 182 | (0)  |      | 186 | (0)  |
|       | 189 | (1)  |      | 197 | (1)  |
|       | 291 | (2)  |      | 281 | (2)  |
|       | 307 | (2)  |      | 289 | (3)  |
|       | 321 | (5)  |      | 324 | (8)  |
|       | 330 | (5)  |      | 342 | (5)  |
|       | 367 | (6)  |      | 376 | (3)  |
|       | 396 | (1)  |      | 389 | (5)  |
|       | 421 | (1)  |      | 410 | (2)  |
|       | 449 | (4)  |      | 417 | (3)  |
|       | 452 | (3)  |      | 431 | (2)  |
|       | 483 | (29) |      | 467 | (35) |
|       | 498 | (15) |      | 474 | (6)  |
|       | 527 | (12) |      | 505 | (1)  |
|       | 538 | (27) |      | 533 | (1)  |

---

|      |       |      |       |
|------|-------|------|-------|
| 556  | (25)  | 540  | (3)   |
| 567  | (4)   | 543  | (14)  |
| 570  | (1)   | 561  | (11)  |
| 589  | (3)   | 567  | (3)   |
| 594  | (1)   | 577  | (6)   |
| 701  | (2)   | 678  | (2)   |
| 705  | (1)   | 685  | (2)   |
| 814  | (33)  | 784  | (4)   |
| 815  | (5)   | 787  | (31)  |
| 829  | (11)  | 790  | (12)  |
| 832  | (6)   | 791  | (11)  |
| 836  | (17)  | 794  | (8)   |
| 837  | (4)   | 804  | (7)   |
| 851  | (6)   | 819  | (3)   |
| 855  | (12)  | 822  | (4)   |
| 904  | (2)   | 855  | (4)   |
| 911  | (4)   | 857  | (4)   |
| 926  | (3)   | 884  | (2)   |
| 938  | (0)   | 885  | (0)   |
| 1045 | (7)   | 1016 | (8)   |
| 1048 | (6)   | 1018 | (4)   |
| 1067 | (3)   | 1032 | (3)   |
| 1069 | (4)   | 1036 | (4)   |
| 1085 | (2)   | 1052 | (1)   |
| 1090 | (1)   | 1053 | (0)   |
| 1258 | (7)   | 1206 | (5)   |
| 1260 | (5)   | 1207 | (8)   |
| 1335 | (9)   | 1286 | (10)  |
| 1336 | (1)   | 1288 | (5)   |
| 1416 | (2)   | 1368 | (1)   |
| 1426 | (0)   | 1378 | (1)   |
| 1433 | (0)   | 1389 | (2)   |
| 1443 | (2)   | 1390 | (0)   |
| 1938 | (896) | 1836 | (846) |
| 1957 | (493) | 1855 | (257) |
| 3206 | (1)   | 3138 | (1)   |
| 3209 | (0)   | 3139 | (0)   |
| 3218 | (0)   | 3143 | (0)   |
| 3219 | (0)   | 3148 | (0)   |
| 3223 | (1)   | 3154 | (0)   |
| 3227 | (1)   | 3157 | (0)   |
| 3236 | (1)   | 3164 | (1)   |
| 3238 | (0)   | 3165 | (1)   |

---



**Table S25.** Cartesian coordinates for the 24 structures discussed in this paper.

**(C<sub>4</sub>H<sub>4</sub>P)<sub>2</sub>Mn<sub>2</sub>(CO)<sub>5</sub>**  
**5S-1(C<sub>1</sub>) / B3LYP**

|    |             |             |             |
|----|-------------|-------------|-------------|
| C  | 1.51689800  | 1.95582100  | 0.26631000  |
| C  | 2.28661000  | 1.55952200  | 1.37736000  |
| C  | 3.57100300  | 1.04756700  | 0.98034700  |
| C  | 3.73624600  | 1.07886400  | -0.42371700 |
| P  | 2.34751500  | 1.77816400  | -1.30722400 |
| H  | 1.94516800  | 1.61082700  | 2.40791800  |
| H  | 0.49712100  | 2.31679600  | 0.36673400  |
| H  | 4.63073800  | 0.70380400  | -0.91400400 |
| H  | 4.31834500  | 0.67728800  | 1.67685000  |
| C  | -1.11226100 | -0.46834200 | -1.81631200 |
| C  | -2.29069100 | -1.25767000 | -1.78056200 |
| C  | -2.34526100 | -2.08163700 | -0.60678100 |
| C  | -1.22428500 | -1.90741200 | 0.23536200  |
| P  | -0.04806100 | -0.76486700 | -0.44229800 |
| H  | -3.06011100 | -1.23935200 | -2.54654000 |
| H  | -0.89484200 | 0.24836300  | -2.60279000 |
| H  | -1.10383600 | -2.41533400 | 1.18768300  |
| H  | -3.17175600 | -2.74967400 | -0.38046300 |
| Mn | 2.04260400  | -0.21166500 | 0.09462400  |
| Mn | -2.32326000 | 0.02287700  | -0.01324200 |
| C  | -1.91539100 | 0.58306500  | 1.65192600  |
| C  | 2.73193400  | -1.47779800 | -0.97748700 |
| C  | -4.08759900 | -0.07819000 | 0.35447300  |
| C  | -2.49512100 | 1.70993900  | -0.62610100 |
| C  | 2.04025000  | -1.31219200 | 1.50835400  |
| O  | -5.22377700 | -0.15174800 | 0.58116600  |
| O  | -2.58542200 | 2.78813400  | -1.04853600 |
| O  | 3.23052500  | -2.26666200 | -1.67409600 |
| O  | -1.62526300 | 0.92812600  | 2.72217400  |
| O  | 2.06515800  | -2.01556300 | 2.43852400  |

**5S-1(C<sub>1</sub>) / BP86**

|   |            |            |             |
|---|------------|------------|-------------|
| C | 1.48717200 | 1.94949700 | 0.27008700  |
| C | 2.27837500 | 1.56213400 | 1.38451700  |
| C | 3.56529100 | 1.04849600 | 0.97324700  |
| C | 3.70993800 | 1.06948100 | -0.44679700 |
| P | 2.30368200 | 1.76866700 | -1.32613400 |
| H | 1.94127900 | 1.61144400 | 2.42530900  |
| H | 0.45570300 | 2.30122600 | 0.37853800  |
| H | 4.60265500 | 0.68625900 | -0.95238200 |
| H | 4.32657200 | 0.67494600 | 1.66596900  |

|    |             |             |             |
|----|-------------|-------------|-------------|
| C  | -1.08255300 | -0.42099900 | -1.82141800 |
| C  | -2.25813600 | -1.23617800 | -1.80915600 |
| C  | -2.31448700 | -2.07665000 | -0.63819800 |
| C  | -1.19294000 | -1.89800400 | 0.22241600  |
| P  | -0.00625200 | -0.74295800 | -0.44600500 |
| H  | -3.03034400 | -1.21134000 | -2.58404300 |
| H  | -0.86388700 | 0.31630100  | -2.59980400 |
| H  | -1.07254200 | -2.41218600 | 1.18061500  |
| H  | -3.14199000 | -2.76046000 | -0.42305200 |
| Mn | 2.03366600  | -0.18234000 | 0.10602800  |
| Mn | -2.29886800 | 0.00107100  | -0.03384400 |
| C  | -1.86987200 | 0.59483800  | 1.59872500  |
| C  | 2.72768900  | -1.46722600 | -0.91866400 |
| C  | -4.03116300 | -0.13251500 | 0.40250700  |
| C  | -2.56510700 | 1.65949100  | -0.64195800 |
| C  | 2.00933300  | -1.27785200 | 1.50852500  |
| O  | -5.17085800 | -0.21423600 | 0.68460900  |
| O  | -2.73248800 | 2.74786000  | -1.06077600 |
| O  | 3.23270600  | -2.29493500 | -1.59137100 |
| O  | -1.57700100 | 0.97638600  | 2.67368500  |
| O  | 2.01888100  | -2.00347100 | 2.44177200  |

### 5S-2 (C<sub>1</sub>) / B3LYP

|    |             |             |             |
|----|-------------|-------------|-------------|
| C  | -0.92800300 | -2.62984900 | -0.42803000 |
| C  | -2.31833600 | -2.39974400 | -0.47395300 |
| C  | -2.65647300 | -1.33465400 | -1.37746400 |
| C  | -1.53252200 | -0.77680300 | -2.01164000 |
| P  | -0.00050400 | -1.61331200 | -1.58525700 |
| H  | -3.04928000 | -2.94425200 | 0.11684800  |
| H  | -0.46718700 | -3.37528300 | 0.21368200  |
| H  | -1.60257300 | 0.04725600  | -2.71356600 |
| H  | -3.67348400 | -0.98410600 | -1.53410800 |
| C  | -0.55669800 | 2.49665700  | -1.55841600 |
| C  | -0.69249400 | 3.78272500  | -1.12062400 |
| C  | -0.53429100 | 3.94648700  | 0.32558000  |
| C  | -0.25775700 | 2.78749700  | 0.98990400  |
| P  | -0.18431200 | 1.42153900  | -0.16940500 |
| H  | -0.89196700 | 4.62655800  | -1.78017000 |
| H  | -0.61058200 | 2.18713600  | -2.59780900 |
| H  | -0.10399300 | 2.69729900  | 2.06151500  |
| H  | -0.62686800 | 4.91671000  | 0.81169100  |
| Mn | -1.28594300 | -0.58902800 | 0.17878400  |
| Mn | 1.43995400  | -0.22744000 | -0.04435000 |
| C  | -0.60454200 | -0.97101900 | 1.80048200  |

|   |             |             |             |
|---|-------------|-------------|-------------|
| C | 2.24569400  | 0.63179200  | 1.32813200  |
| C | 2.68961800  | 0.37190000  | -1.19135400 |
| C | -2.64658900 | 0.26885900  | 0.99225000  |
| O | 2.76739600  | 1.16077200  | 2.21874400  |
| O | 3.46994000  | 0.76444800  | -1.95588400 |
| O | -0.27216000 | -1.29225000 | 2.87090800  |
| O | -3.53629200 | 0.80473100  | 1.51233700  |
| C | 2.32098200  | -1.77250500 | 0.37304500  |
| O | 2.91816300  | -2.72408700 | 0.66558600  |

**5S-2 (C<sub>1</sub>) / BP86**

|    |             |             |             |
|----|-------------|-------------|-------------|
| C  | -0.85957700 | -2.62252000 | -0.40589600 |
| C  | -2.26931300 | -2.43455000 | -0.45056600 |
| C  | -2.64228300 | -1.37397700 | -1.35537600 |
| C  | -1.52774800 | -0.77739800 | -1.99989800 |
| P  | 0.04327300  | -1.57708400 | -1.57707600 |
| H  | -2.98659900 | -2.99865400 | 0.15391000  |
| H  | -0.36484800 | -3.35231600 | 0.24237200  |
| H  | -1.62342000 | 0.04989100  | -2.70851900 |
| H  | -3.67651600 | -1.04526900 | -1.50531100 |
| C  | -0.56615000 | 2.48205200  | -1.57224800 |
| C  | -0.71069900 | 3.77316000  | -1.12177800 |
| C  | -0.58745800 | 3.92568300  | 0.33381400  |
| C  | -0.32368800 | 2.75530400  | 1.00258900  |
| P  | -0.21619600 | 1.39889400  | -0.17482400 |
| H  | -0.88937200 | 4.62977100  | -1.78473600 |
| H  | -0.58119900 | 2.17556400  | -2.62230600 |
| H  | -0.19348500 | 2.64665600  | 2.08347100  |
| H  | -0.69237500 | 4.89949300  | 0.82899400  |
| Mn | -1.27538900 | -0.60835000 | 0.16284100  |
| Mn | 1.41719500  | -0.21467600 | -0.06544400 |
| C  | -0.61364700 | -0.96994200 | 1.78549400  |
| C  | 2.21125600  | 0.63380300  | 1.29007100  |
| C  | 2.66654300  | 0.40514100  | -1.16446300 |
| C  | -2.61191500 | 0.23775900  | 0.99695500  |
| O  | 2.75217400  | 1.16564800  | 2.18981000  |
| O  | 3.48165000  | 0.81381100  | -1.91067700 |
| O  | -0.29042000 | -1.27401100 | 2.87971900  |
| O  | -3.49895000 | 0.77131500  | 1.55874200  |
| C  | 2.31599900  | -1.73045300 | 0.35410100  |
| O  | 2.95162200  | -2.67438900 | 0.65726500  |

**5S-3(C<sub>1</sub>) / B3LYP**

|   |            |             |             |
|---|------------|-------------|-------------|
| C | 2.45937200 | -1.38291200 | -0.91435200 |
|---|------------|-------------|-------------|

|    |             |             |             |
|----|-------------|-------------|-------------|
| C  | 3.12557200  | -0.18663600 | -1.26701700 |
| C  | 3.60219000  | 0.51204900  | -0.10795800 |
| C  | 3.28527400  | -0.17175500 | 1.08697300  |
| P  | 2.44215200  | -1.72568600 | 0.83002300  |
| H  | 3.23571000  | 0.17570700  | -2.28537900 |
| H  | 1.98762500  | -2.02351700 | -1.65453300 |
| H  | 3.52796500  | 0.22574600  | 2.06916500  |
| H  | 4.13085200  | 1.46088800  | -0.14754600 |
| C  | -3.56710600 | -0.19310200 | -0.04437100 |
| C  | -3.10733500 | 0.33727600  | -1.28469200 |
| C  | -2.25756100 | 1.46224400  | -1.09716100 |
| C  | -2.08708700 | 1.78251400  | 0.27660600  |
| P  | -3.01273000 | 0.73884800  | 1.36418900  |
| H  | -3.35562400 | -0.07492200 | -2.25911900 |
| H  | -4.20912300 | -1.06712000 | 0.02179300  |
| H  | -1.45482000 | 2.59739600  | 0.61538700  |
| H  | -1.78900500 | 2.00517200  | -1.91288100 |
| C  | 0.10371300  | 0.04447500  | -1.43964000 |
| C  | -0.94020200 | -1.29330000 | 1.34051100  |
| C  | 0.74171000  | 0.94884900  | 1.57285400  |
| C  | 1.36724400  | 2.07064400  | -0.60972000 |
| C  | -1.42585800 | -1.88613700 | -1.03387200 |
| O  | 1.35769100  | 3.16837600  | -0.99780300 |
| O  | 0.16725100  | 0.05453100  | -2.62350800 |
| O  | -1.51406500 | -2.89110600 | -1.61080700 |
| O  | 0.43180100  | 1.35128600  | 2.61936700  |
| O  | -0.78212000 | -1.95362200 | 2.28127500  |
| Mn | -1.37526100 | -0.33188900 | -0.14080900 |
| Mn | 1.43130400  | 0.38797900  | -0.00228000 |

**5S-3 (C<sub>1</sub>) / BP86**

|   |             |             |             |
|---|-------------|-------------|-------------|
| C | 2.53712400  | -1.24324600 | -0.99769300 |
| C | 3.23208100  | -0.00504000 | -1.09509900 |
| C | 3.54155000  | 0.53600600  | 0.20833200  |
| C | 3.07557300  | -0.31591500 | 1.25275500  |
| P | 2.29430300  | -1.82529900 | 0.67985100  |
| H | 3.46935700  | 0.49580400  | -2.03969700 |
| H | 2.16895500  | -1.77940400 | -1.87816000 |
| H | 3.17327500  | -0.05636300 | 2.31253200  |
| H | 4.05753900  | 1.48840300  | 0.37014500  |
| C | -3.50544600 | -0.26380000 | -0.03497700 |
| C | -3.06600100 | 0.19877600  | -1.32060200 |
| C | -2.25087300 | 1.37146400  | -1.21209600 |
| C | -2.08387700 | 1.78518600  | 0.14527300  |
| P | -2.96868900 | 0.77800100  | 1.32134600  |

|    |             |             |             |
|----|-------------|-------------|-------------|
| H  | -3.30345200 | -0.29233600 | -2.27020200 |
| H  | -4.11101400 | -1.16669300 | 0.09640000  |
| H  | -1.46114000 | 2.63912200  | 0.42904000  |
| H  | -1.79507400 | 1.87745900  | -2.06888200 |
| C  | 0.13594400  | 0.02846500  | -1.45083900 |
| C  | -0.92063000 | -1.23596300 | 1.35795200  |
| C  | 0.64566700  | 1.01163100  | 1.50519600  |
| C  | 1.35003400  | 2.05219800  | -0.61847600 |
| C  | -1.30872200 | -1.90209700 | -0.94631100 |
| O  | 1.33879300  | 3.16451500  | -1.01682900 |
| O  | 0.19676100  | 0.02100100  | -2.65247700 |
| O  | -1.33826700 | -2.95627000 | -1.47378900 |
| O  | 0.30681600  | 1.48829100  | 2.53065800  |
| O  | -0.77007800 | -1.88679400 | 2.32695500  |
| Mn | -1.33457600 | -0.32092700 | -0.13936300 |
| Mn | 1.40460000  | 0.39098800  | 0.00153200  |

#### 5S-4 (C<sub>1</sub>) / B3LYP

|   |             |             |             |
|---|-------------|-------------|-------------|
| C | -3.44494000 | -0.18907300 | 0.73365800  |
| C | -3.53884500 | 0.66558700  | -0.38695700 |
| C | -2.91058600 | 0.10466400  | -1.54565000 |
| C | -2.35554200 | -1.16767400 | -1.26996700 |
| P | -2.63646300 | -1.74606500 | 0.38508800  |
| H | -4.01500100 | 1.64262200  | -0.37168700 |
| H | -3.82881800 | 0.08657400  | 1.71244800  |
| H | -1.79355000 | -1.72832100 | -2.01232300 |
| H | -2.83736900 | 0.61062300  | -2.50403900 |
| C | 3.56550400  | -0.01057400 | -0.25488200 |
| C | 3.26919500  | -0.41990800 | 1.06672000  |
| C | 2.39130000  | 0.50816700  | 1.72350400  |
| C | 2.04703400  | 1.58760300  | 0.88630600  |
| P | 2.82347800  | 1.53962400  | -0.71830800 |
| H | 3.65259800  | -1.32534000 | 1.52956100  |
| H | 4.19056100  | -0.59861400 | -0.92185400 |
| H | 1.35998700  | 2.37074500  | 1.19355300  |
| H | 2.01923000  | 0.37799300  | 2.73602800  |
| C | -0.89722700 | 0.50842400  | 1.76585400  |
| C | 0.05116900  | 0.35103900  | -1.34491400 |
| C | 1.58287200  | -1.60719900 | -1.34164900 |
| C | -1.25280100 | 2.16833800  | -0.12446500 |
| C | 0.76140300  | -1.69643700 | 1.02743100  |
| O | -1.18646700 | 3.32644300  | -0.21960100 |
| O | -0.68267300 | 0.61308900  | 2.90575700  |
| O | 0.50353700  | -2.57849800 | 1.73703800  |



|    |             |             |             |
|----|-------------|-------------|-------------|
| O  | 1.75872000  | -2.40290800 | -2.16972600 |
| O  | 0.02707200  | 0.61680600  | -2.49622100 |
| Mn | 1.39599200  | -0.38172000 | -0.04416100 |
| Mn | -1.41701600 | 0.39144600  | 0.04290900  |

**5S-4 (C<sub>1</sub>) / BP86**

|    |             |             |             |
|----|-------------|-------------|-------------|
| C  | -3.26674300 | -0.33890000 | 0.90911300  |
| C  | -3.51196500 | 0.68271700  | -0.05339700 |
| C  | -3.03305600 | 0.30675000  | -1.36193600 |
| C  | -2.43305300 | -0.98476300 | -1.34809600 |
| P  | -2.49194500 | -1.81413200 | 0.23736800  |
| H  | -3.99025200 | 1.64193200  | 0.17186200  |
| H  | -3.51447900 | -0.21965000 | 1.96956000  |
| H  | -1.95907400 | -1.41807600 | -2.23461500 |
| H  | -3.08337000 | 0.95330500  | -2.24432900 |
| C  | 3.40879100  | 0.10616700  | -0.58084600 |
| C  | 3.35998200  | -0.48258900 | 0.72334000  |
| C  | 2.58942500  | 0.32660600  | 1.63562300  |
| C  | 2.08219700  | 1.49669100  | 1.00974100  |
| P  | 2.56585000  | 1.67696700  | -0.70655600 |
| H  | 3.83886300  | -1.42938600 | 0.99444200  |
| H  | 3.91812100  | -0.37147200 | -1.42477100 |
| H  | 1.43803900  | 2.21247800  | 1.52944700  |
| H  | 2.39502100  | 0.05707700  | 2.67942000  |
| C  | -0.76637200 | 0.54521100  | 1.72306700  |
| C  | 0.00808400  | 0.30785800  | -1.36243200 |
| C  | 1.44223700  | -1.67647300 | -1.24196300 |
| C  | -1.18140200 | 2.14974100  | -0.12700300 |
| C  | 0.75677900  | -1.65749400 | 1.08355600  |
| O  | -1.08106400 | 3.32233000  | -0.22379300 |
| O  | -0.51703100 | 0.69571100  | 2.86850300  |
| O  | 0.52045500  | -2.53930200 | 1.82743400  |
| O  | 1.55164400  | -2.54826300 | -2.02812700 |
| O  | -0.00484500 | 0.52516800  | -2.54338000 |
| Mn | 1.35242800  | -0.38157400 | -0.03216200 |
| Mn | -1.37779400 | 0.39345300  | 0.04572600  |

**5S-5 (C<sub>1</sub>) / B3LYP**

|   |             |             |             |
|---|-------------|-------------|-------------|
| C | -3.42875900 | -0.62695300 | 0.77275200  |
| C | -3.66725700 | 0.40882500  | -0.15574600 |
| C | -3.09602100 | 0.12604400  | -1.43805300 |
| C | -2.44528400 | -1.13205500 | -1.44864900 |
| P | -2.55223300 | -2.02583300 | 0.07587900  |
| H | -4.20018900 | 1.32640600  | 0.07961300  |
| H | -3.74787200 | -0.56837300 | 1.80993500  |

|    |             |             |             |
|----|-------------|-------------|-------------|
| H  | -1.91669300 | -1.49738700 | -2.32398200 |
| H  | -3.13729200 | 0.80062900  | -2.28836700 |
| C  | 2.77104700  | -1.28940700 | -1.20327300 |
| C  | 1.54332900  | -1.94211300 | -0.97190100 |
| C  | 1.26515500  | -2.08594200 | 0.42804100  |
| C  | 2.27906200  | -1.52589500 | 1.22843400  |
| P  | 3.64547800  | -0.84908200 | 0.29539800  |
| H  | 0.88104600  | -2.29063400 | -1.75936100 |
| H  | 3.13214000  | -1.05591900 | -2.20161400 |
| H  | 2.21555300  | -1.49407800 | 2.31305600  |
| H  | 0.36334100  | -2.54796700 | 0.81639500  |
| C  | 1.45045300  | 1.23598900  | 1.31426200  |
| C  | 2.07374000  | 1.43910200  | -1.07054900 |
| C  | -0.12112900 | 0.38308100  | -1.35130100 |
| C  | -1.46678600 | 2.02279000  | 0.25315800  |
| C  | -0.89139100 | -0.07183400 | 1.74858800  |
| O  | -1.49377700 | 3.17855900  | 0.37014700  |
| O  | 1.57275000  | 1.97315600  | 2.20025200  |
| O  | -0.66291100 | -0.32381600 | 2.86287000  |
| O  | -0.18008100 | 0.51824600  | -2.52681900 |
| O  | 2.54455500  | 2.28922700  | -1.70361700 |
| Mn | -1.50330300 | 0.23109700  | 0.07427200  |
| Mn | 1.43010500  | 0.07763400  | -0.08515500 |

**5S-5 (C<sub>1</sub>) / BP86**

|   |             |             |             |
|---|-------------|-------------|-------------|
| C | -3.33892500 | -0.61353600 | 0.87481400  |
| C | -3.62347500 | 0.45555300  | -0.02119000 |
| C | -3.13636400 | 0.18699300  | -1.35016800 |
| C | -2.49044600 | -1.08298300 | -1.42239400 |
| P | -2.51480800 | -2.01575900 | 0.09841300  |
| H | -4.13481100 | 1.37991600  | 0.26753900  |
| H | -3.58232400 | -0.56996000 | 1.94170600  |
| H | -2.01019900 | -1.43537500 | -2.34059500 |
| H | -3.21207000 | 0.88744500  | -2.18810900 |
| C | 2.69670600  | -1.24854900 | -1.25524000 |
| C | 1.47806600  | -1.93705900 | -1.00779800 |
| C | 1.23682900  | -2.11344800 | 0.40198900  |
| C | 2.26616000  | -1.54251700 | 1.19463900  |
| P | 3.61032500  | -0.82112300 | 0.23826300  |
| H | 0.79701800  | -2.27981600 | -1.79324900 |
| H | 3.02950200  | -0.97856400 | -2.26332700 |
| H | 2.22320200  | -1.52156100 | 2.28887300  |
| H | 0.34032100  | -2.59346400 | 0.80666700  |
| C | 1.48514400  | 1.21108400  | 1.29296900  |
| C | 1.95876900  | 1.43002400  | -1.04031200 |

|    |             |             |             |
|----|-------------|-------------|-------------|
| C  | -0.17272800 | 0.35742900  | -1.36916100 |
| C  | -1.40195000 | 1.99931400  | 0.25690900  |
| C  | -0.77005800 | -0.09268500 | 1.68690700  |
| O  | -1.40223000 | 3.17056000  | 0.38837600  |
| O  | 1.66441600  | 1.97745600  | 2.16587600  |
| O  | -0.53326400 | -0.35961000 | 2.81495800  |
| O  | -0.19636600 | 0.48000500  | -2.56630500 |
| O  | 2.39221800  | 2.32557200  | -1.66707000 |
| Mn | -1.47867500 | 0.22750500  | 0.06221000  |
| Mn | 1.38235800  | 0.04669600  | -0.07453500 |

**(C<sub>4</sub>H<sub>4</sub>P)<sub>2</sub>Mn<sub>2</sub>(CO)<sub>4</sub>**

**4S-1 (C<sub>i</sub>) / B3LYP**

|    |             |             |             |
|----|-------------|-------------|-------------|
| C  | 1.33375600  | 1.45745000  | 1.26176000  |
| C  | 2.64541300  | 1.58552900  | 0.71167900  |
| C  | 2.64541300  | 1.58552900  | -0.71167900 |
| C  | 1.33375600  | 1.45745000  | -1.26176000 |
| P  | 0.10489800  | 1.44313300  | 0.00000000  |
| H  | 3.54541700  | 1.67616200  | 1.31273700  |
| H  | 1.12021700  | 1.43179300  | 2.32537600  |
| H  | 1.12021700  | 1.43179300  | -2.32537600 |
| H  | 3.54541700  | 1.67616200  | -1.31273700 |
| C  | -1.33375600 | -1.45745000 | -1.26176000 |
| C  | -2.64541300 | -1.58552900 | -0.71167900 |
| C  | -2.64541300 | -1.58552900 | 0.71167900  |
| C  | -1.33375600 | -1.45745000 | 1.26176000  |
| P  | -0.10489800 | -1.44313300 | 0.00000000  |
| H  | -3.54541700 | -1.67616200 | -1.31273700 |
| H  | -1.12021700 | -1.43179300 | -2.32537600 |
| H  | -1.12021700 | -1.43179300 | 2.32537600  |
| H  | -3.54541700 | -1.67616200 | 1.31273700  |
| Mn | 1.84070600  | -0.29698500 | 0.00000000  |
| Mn | -1.84070600 | 0.29698500  | 0.00000000  |
| C  | -2.64541300 | 1.24921100  | -1.29457900 |
| C  | 2.64541300  | -1.24921100 | 1.29457900  |
| C  | -2.64541300 | 1.24921100  | 1.29457900  |
| C  | 2.64541300  | -1.24921100 | -1.29457900 |
| O  | -3.19429200 | 1.82085100  | 2.14888100  |
| O  | -3.19429200 | 1.82085100  | -2.14888100 |
| O  | 3.19429200  | -1.82085100 | 2.14888100  |
| O  | 3.19429200  | -1.82085100 | -2.14888100 |

**4S-1 (C<sub>i</sub>) / BP86**

|   |             |            |             |
|---|-------------|------------|-------------|
| C | -1.93838700 | 1.23742800 | -0.21595900 |
| C | -2.66637300 | 0.88927300 | -1.40451400 |

|    |             |             |             |
|----|-------------|-------------|-------------|
| C  | -2.58551000 | -0.51171000 | -1.71064100 |
| C  | -1.79538000 | -1.24024700 | -0.75735300 |
| P  | -1.24963600 | -0.19827900 | 0.57735700  |
| H  | -3.22202000 | 1.61196600  | -2.00993700 |
| H  | -1.86028000 | 2.25143400  | 0.18570600  |
| H  | -1.59674400 | -2.31412500 | -0.81189700 |
| H  | -3.07278900 | -0.97346000 | -2.57488100 |
| C  | 1.93838700  | -1.23742800 | 0.21595900  |
| C  | 2.66637300  | -0.88927300 | 1.40451400  |
| C  | 2.58551000  | 0.51171000  | 1.71064100  |
| C  | 1.79538000  | 1.24024700  | 0.75735300  |
| P  | 1.24963600  | 0.19827900  | -0.57735700 |
| H  | 3.22202000  | -1.61196600 | 2.00993700  |
| H  | 1.86028000  | -2.25143400 | -0.18570600 |
| H  | 1.59674400  | 2.31412500  | 0.81189700  |
| H  | 3.07278900  | 0.97346000  | 2.57488100  |
| Mn | -0.62917500 | 0.34193900  | -1.73100800 |
| Mn | 0.62917500  | -0.34193900 | 1.73100800  |
| C  | 0.24158500  | -1.85829200 | 2.58831300  |
| C  | -0.24158500 | 1.85829200  | -2.58831300 |
| C  | 0.09807200  | 0.62800600  | 3.13160900  |
| C  | -0.09807200 | -0.62800600 | -3.13160900 |
| O  | -0.20999000 | 1.28209900  | 4.06593900  |
| O  | 0.02975900  | -2.87114400 | 3.15837900  |
| O  | -0.02975900 | 2.87114400  | -3.15837900 |
| O  | 0.20999000  | -1.28209900 | -4.06593900 |

#### 4S-2 (C<sub>1</sub>) / B3LYP

|   |             |             |             |
|---|-------------|-------------|-------------|
| C | -3.01219900 | -0.06083600 | -1.16953400 |
| C | -3.31378300 | -0.84541600 | -0.02063400 |
| C | -3.00686500 | -0.14203200 | 1.20098500  |
| C | -2.50929300 | 1.17225200  | 0.93921800  |
| P | -2.43800600 | 1.60538600  | -0.78568100 |
| H | -3.70083700 | -1.86940200 | -0.05667100 |
| H | -3.12359400 | -0.44016500 | -2.19084300 |
| H | -2.17233200 | 1.84037700  | 1.73902900  |
| H | -3.12991900 | -0.56817900 | 2.20239300  |
| C | 2.83102000  | -0.34785800 | 1.18621600  |
| C | 3.18761100  | 0.90086300  | 0.59311700  |
| C | 3.15750500  | 0.81875100  | -0.84785600 |
| C | 2.81418400  | -0.48998000 | -1.29176500 |
| P | 2.55826300  | -1.68737800 | 0.00776900  |
| H | 3.42152300  | 1.81118100  | 1.15499500  |
| H | 2.75139200  | -0.47812600 | 2.27086800  |

|    |             |             |             |
|----|-------------|-------------|-------------|
| H  | 2.64930200  | -0.72034300 | -2.35036100 |
| H  | 3.35552400  | 1.66547900  | -1.51397900 |
| Mn | -1.20791700 | -0.40536900 | 0.01973000  |
| Mn | 1.19401200  | 0.39800100  | -0.02027700 |
| O  | -0.85701200 | -3.27729800 | 0.63065800  |
| O  | 0.03398300  | 0.37880500  | 2.70032300  |
| C  | 0.80472300  | 2.13090900  | -0.10284100 |
| C  | -0.30293700 | -0.65073700 | -1.50323700 |
| C  | -0.96245200 | -2.12274200 | 0.40626100  |
| C  | 0.26643100  | 0.30931000  | 1.53228200  |
| O  | 0.63504000  | 3.30047400  | -0.09776700 |
| O  | 0.03411600  | -0.88468700 | -2.62150400 |

**4S-2 (C<sub>1</sub>) / BP86**

|    |             |             |             |
|----|-------------|-------------|-------------|
| C  | -3.01219900 | -0.06083600 | -1.16953400 |
| C  | -3.31378300 | -0.84541600 | -0.02063400 |
| C  | -3.00686500 | -0.14203200 | 1.20098500  |
| C  | -2.50929300 | 1.17225200  | 0.93921800  |
| P  | -2.43800600 | 1.60538600  | -0.78568100 |
| H  | -3.70083700 | -1.86940200 | -0.05667100 |
| H  | -3.12359400 | -0.44016500 | -2.19084300 |
| H  | -2.17233200 | 1.84037700  | 1.73902900  |
| H  | -3.12991900 | -0.56817900 | 2.20239300  |
| C  | 2.83102000  | -0.34785800 | 1.18621600  |
| C  | 3.18761100  | 0.90086300  | 0.59311700  |
| C  | 3.15750500  | 0.81875100  | -0.84785600 |
| C  | 2.81418400  | -0.48998000 | -1.29176500 |
| P  | 2.55826300  | -1.68737800 | 0.00776900  |
| H  | 3.42152300  | 1.81118100  | 1.15499500  |
| H  | 2.75139200  | -0.47812600 | 2.27086800  |
| H  | 2.64930200  | -0.72034300 | -2.35036100 |
| H  | 3.35552400  | 1.66547900  | -1.51397900 |
| Mn | -1.20791700 | -0.40536900 | 0.01973000  |
| Mn | 1.19401200  | 0.39800100  | -0.02027700 |
| O  | -0.85701200 | -3.27729800 | 0.63065800  |
| O  | 0.03398300  | 0.37880500  | 2.70032300  |
| C  | 0.80472300  | 2.13090900  | -0.10284100 |
| C  | -0.30293700 | -0.65073700 | -1.50323700 |
| C  | -0.96245200 | -2.12274200 | 0.40626100  |
| C  | 0.26643100  | 0.30931000  | 1.53228200  |
| O  | 0.63504000  | 3.30047400  | -0.09776700 |
| O  | 0.03411600  | -0.88468700 | -2.62150400 |

**4S-3 (C<sub>1</sub>) / B3LYP**

|   |            |             |            |
|---|------------|-------------|------------|
| C | 2.89813000 | -0.71304300 | 1.15186700 |
|---|------------|-------------|------------|

|    |             |             |             |
|----|-------------|-------------|-------------|
| C  | 1.87853900  | -1.71431000 | 1.09566800  |
| C  | 1.55603100  | -2.09566100 | -0.24031800 |
| C  | 2.33414900  | -1.35380900 | -1.19064800 |
| P  | 3.55248000  | -0.25988200 | -0.46563400 |
| H  | 1.34933900  | -2.09362700 | 1.97743000  |
| H  | 3.24280200  | -0.26692300 | 2.09064600  |
| H  | 2.20222700  | -1.45867600 | -2.27314500 |
| H  | 0.79335300  | -2.83603500 | -0.50006900 |
| C  | -2.24478100 | -1.29772600 | -1.29428100 |
| C  | -3.06078100 | -0.12886400 | -1.19943700 |
| C  | -3.45713900 | 0.12750800  | 0.16531700  |
| C  | -2.91494700 | -0.83885100 | 1.05996500  |
| P  | -1.98593800 | -2.15398100 | 0.24715800  |
| H  | -3.33490800 | 0.50571100  | -2.04873500 |
| H  | -1.78224900 | -1.60602500 | -2.23903300 |
| H  | -3.05814400 | -0.78421500 | 2.14439000  |
| H  | -4.07559000 | 0.97715400  | 0.47349100  |
| Mn | 1.21634600  | 0.07403600  | 0.00526500  |
| Mn | -1.31351400 | 0.22404300  | 0.01735200  |
| O  | -0.19133700 | 0.33813900  | 2.76111800  |
| O  | 0.10504600  | 0.71334400  | -2.66988300 |
| C  | -1.50849100 | 1.99357800  | -0.02238100 |
| C  | 1.64437100  | 1.78848200  | 0.26384600  |
| C  | -0.47614900 | 0.30991700  | 1.60637900  |
| C  | 0.37376400  | 0.49388400  | -1.53032200 |
| O  | -1.71810900 | 3.15450700  | -0.02205400 |
| O  | 1.98665900  | 2.90550700  | 0.41742300  |

**4S-3 (C<sub>1</sub>) / BP86**

|   |             |             |             |
|---|-------------|-------------|-------------|
| C | 2.89813000  | -0.71304300 | 1.15186700  |
| C | 1.87853900  | -1.71431000 | 1.09566800  |
| C | 1.55603100  | -2.09566100 | -0.24031800 |
| C | 2.33414900  | -1.35380900 | -1.19064800 |
| P | 3.55248000  | -0.25988200 | -0.46563400 |
| H | 1.34933900  | -2.09362700 | 1.97743000  |
| H | 3.24280200  | -0.26692300 | 2.09064600  |
| H | 2.20222700  | -1.45867600 | -2.27314500 |
| H | 0.79335300  | -2.83603500 | -0.50006900 |
| C | -2.24478100 | -1.29772600 | -1.29428100 |
| C | -3.06078100 | -0.12886400 | -1.19943700 |
| C | -3.45713900 | 0.12750800  | 0.16531700  |
| C | -2.91494700 | -0.83885100 | 1.05996500  |
| P | -1.98593800 | -2.15398100 | 0.24715800  |
| H | -3.33490800 | 0.50571100  | -2.04873500 |

|    |             |             |             |
|----|-------------|-------------|-------------|
| H  | -1.78224900 | -1.60602500 | -2.23903300 |
| H  | -3.05814400 | -0.78421500 | 2.14439000  |
| H  | -4.07559000 | 0.97715400  | 0.47349100  |
| Mn | 1.21634600  | 0.07403600  | 0.00526500  |
| Mn | -1.31351400 | 0.22404300  | 0.01735200  |
| O  | -0.19133700 | 0.33813900  | 2.76111800  |
| O  | 0.10504600  | 0.71334400  | -2.66988300 |
| C  | -1.50849100 | 1.99357800  | -0.02238100 |
| C  | 1.64437100  | 1.78848200  | 0.26384600  |
| C  | -0.47614900 | 0.30991700  | 1.60637900  |
| C  | 0.37376400  | 0.49388400  | -1.53032200 |
| O  | -1.71810900 | 3.15450700  | -0.02205400 |
| O  | 1.98665900  | 2.90550700  | 0.41742300  |

#### 4T-1 (C<sub>1</sub>) / B3LYP

|    |             |             |             |
|----|-------------|-------------|-------------|
| C  | 1.10923300  | 2.08994100  | 0.57548500  |
| C  | 2.37742900  | 2.19670900  | -0.03773700 |
| C  | 2.35384100  | 1.72737700  | -1.38627000 |
| C  | 1.06791500  | 1.30847300  | -1.80248000 |
| P  | -0.18184600 | 1.66436100  | -0.58702200 |
| H  | 3.27098400  | 2.56430200  | 0.45957200  |
| H  | 0.91753900  | 2.37698400  | 1.60560100  |
| H  | 0.86853600  | 0.93558900  | -2.80330800 |
| H  | 3.23159600  | 1.70037600  | -2.02805500 |
| C  | -1.32593400 | -1.20357700 | -1.80359000 |
| C  | -2.63211000 | -1.43586700 | -1.33013300 |
| C  | -2.65539200 | -1.95931900 | 0.00612200  |
| C  | -1.35062300 | -2.12618600 | 0.52651000  |
| P  | -0.06508900 | -1.74454400 | -0.64717300 |
| H  | -3.53110600 | -1.21759800 | -1.90129300 |
| H  | -1.11967100 | -0.79966600 | -2.79008300 |
| H  | -1.15324000 | -2.47892200 | 1.53487800  |
| H  | -3.56688800 | -2.18723400 | 0.55147900  |
| Mn | 1.73960600  | -0.00055600 | -0.02606000 |
| Mn | -1.67757400 | -0.00635700 | 0.02654300  |
| C  | -3.13033100 | 1.05269500  | -0.13199300 |
| C  | 2.01380400  | -0.55331900 | 1.67729400  |
| C  | -1.55083000 | 0.42318400  | 1.76513800  |
| C  | 3.22793700  | -1.08545500 | -0.46387100 |
| O  | -1.49683600 | 0.66169700  | 2.90460500  |
| O  | -4.09154000 | 1.70337900  | -0.22340800 |
| O  | 2.21409400  | -0.87695800 | 2.77959800  |
| O  | 4.15001400  | -1.75389100 | -0.67264200 |

#### 4T-1 (C<sub>1</sub>) / BP86

|    |             |             |             |
|----|-------------|-------------|-------------|
| C  | 1.11834400  | 2.09714400  | 0.51335900  |
| C  | 2.44524300  | 2.02284700  | 0.01274600  |
| C  | 2.48204100  | 1.49800500  | -1.33132600 |
| C  | 1.19088300  | 1.18590500  | -1.83828900 |
| P  | -0.14119600 | 1.69712600  | -0.72101900 |
| H  | 3.33974100  | 2.29454400  | 0.58343400  |
| H  | 0.87138200  | 2.42297900  | 1.52851200  |
| H  | 1.03301800  | 0.77601900  | -2.84092300 |
| H  | 3.41078600  | 1.33853300  | -1.89078700 |
| C  | -1.19084400 | -1.18569400 | -1.83843000 |
| C  | -2.48201600 | -1.49783400 | -1.33153200 |
| C  | -2.44525400 | -2.02283200 | 0.01248200  |
| C  | -1.11836800 | -2.09719100 | 0.51312000  |
| P  | 0.14120600  | -1.69703700 | -0.72118100 |
| H  | -3.41074600 | -1.33828800 | -1.89099700 |
| H  | -1.03295400 | -0.77569300 | -2.84101300 |
| H  | -0.87143400 | -2.42313800 | 1.52824500  |
| H  | -3.33976900 | -2.29458500 | 0.58311700  |
| Mn | 1.58034300  | 0.01353700  | -0.02318400 |
| Mn | -1.58033600 | -0.01352600 | -0.02319800 |
| C  | -3.07553900 | 1.00025400  | -0.18390200 |
| C  | 1.59280300  | -0.47616600 | 1.69416800  |
| C  | -1.59283400 | 0.47594900  | 1.69422100  |
| C  | 3.07555100  | -1.00022100 | -0.18399400 |
| O  | -1.64835200 | 0.76837200  | 2.83726800  |
| O  | -4.05976200 | 1.64634600  | -0.23480900 |
| O  | 1.64828500  | -0.76879300 | 2.83716600  |
| O  | 4.05977800  | -1.64629700 | -0.23497100 |

#### 4T-2 (C<sub>2</sub>) / B3LYP

|   |             |             |             |
|---|-------------|-------------|-------------|
| C | -3.35534500 | -0.43212200 | -0.96073800 |
| C | -2.40911600 | -1.36542700 | -1.43672600 |
| C | -1.75078900 | -2.04883700 | -0.37440600 |
| C | -2.24991000 | -1.67165200 | 0.89902800  |
| P | -3.55775000 | -0.47120800 | 0.83109900  |
| H | -2.14511700 | -1.48582700 | -2.48500200 |
| H | -3.93707500 | 0.21028700  | -1.61649100 |
| H | -1.85684000 | -2.07684800 | 1.82839000  |
| H | -0.96853100 | -2.78680100 | -0.53266100 |
| C | 2.13704300  | -1.78442900 | -0.70084200 |
| C | 1.78356200  | -1.96526600 | 0.65342600  |
| C | 2.52611300  | -1.09190300 | 1.51623800  |
| C | 3.42521700  | -0.27551200 | 0.79743200  |
| P | 3.43080900  | -0.58012700 | -0.96384200 |



|                                    |             |             |             |
|------------------------------------|-------------|-------------|-------------|
| H                                  | 1.03064600  | -2.66356100 | 1.00803900  |
| H                                  | 1.65323000  | -2.32300600 | -1.51166800 |
| H                                  | 4.04312300  | 0.47795500  | 1.27878200  |
| H                                  | 2.39399200  | -1.05333100 | 2.59437400  |
| Mn                                 | -1.40237200 | 0.16895000  | -0.11483200 |
| Mn                                 | 1.36034100  | 0.13447500  | 0.11682300  |
| O                                  | 0.14559400  | 0.41899100  | -2.58912100 |
| O                                  | -0.23824400 | 0.54253300  | 2.59136100  |
| C                                  | 1.73398100  | 1.90111600  | 0.09363600  |
| C                                  | -1.75767300 | 1.95097700  | -0.16398600 |
| C                                  | 0.37474400  | 0.31176200  | -1.44291500 |
| C                                  | 0.17995300  | 0.37980100  | 1.50823600  |
| O                                  | 2.02892000  | 3.02185700  | 0.08513700  |
| O                                  | -2.07192300 | 3.07092900  | -0.20646300 |
| <b>4T-2 (C<sub>2</sub>) / BP86</b> |             |             |             |
| C                                  | 1.01178200  | 3.16885600  | -0.23694300 |
| C                                  | 1.40895700  | 2.29054200  | -1.28083000 |
| C                                  | 0.28694100  | 1.82222100  | -2.04464800 |
| C                                  | -0.94948000 | 2.35897800  | -1.56656300 |
| P                                  | -0.76936400 | 3.51397200  | -0.21025200 |
| H                                  | 2.44001100  | 1.95977100  | -1.44305500 |
| H                                  | 1.72130400  | 3.59515100  | 0.47999100  |
| H                                  | -1.92144500 | 2.08949700  | -1.99291500 |
| H                                  | 0.37460400  | 1.12185400  | -2.88199500 |
| C                                  | 0.94948000  | -2.35897800 | -1.56656300 |
| C                                  | -0.28694100 | -1.82222100 | -2.04464800 |
| C                                  | -1.40895700 | -2.29054200 | -1.28083000 |
| C                                  | -1.01178200 | -3.16885600 | -0.23694300 |
| P                                  | 0.76936400  | -3.51397200 | -0.21025200 |
| H                                  | -0.37460400 | -1.12185400 | -2.88199500 |
| H                                  | 1.92144500  | -2.08949700 | -1.99291500 |
| H                                  | -1.72130400 | -3.59515100 | 0.47999100  |
| H                                  | -2.44001100 | -1.95977100 | -1.44305500 |
| Mn                                 | 0.00000000  | 1.23122400  | 0.05535400  |
| Mn                                 | 0.00000000  | -1.23122400 | 0.05535400  |
| O                                  | 2.73309600  | -0.09540100 | 0.27773100  |
| O                                  | -2.73309600 | 0.09540100  | 0.27773100  |
| C                                  | -0.06709000 | -1.54534100 | 1.84137300  |
| C                                  | 0.06709000  | 1.54534100  | 1.84137300  |
| C                                  | 1.55318400  | -0.27358200 | 0.19924700  |
| C                                  | -1.55318400 | 0.27358200  | 0.19924700  |
| O                                  | -0.09980300 | -1.79112500 | 2.98958400  |
| O                                  | 0.09980300  | 1.79112500  | 2.98958400  |

**4T-3 (C<sub>1</sub>) / B3LYP**

|    |             |             |             |
|----|-------------|-------------|-------------|
| C  | -3.19445400 | 0.38980700  | -1.08214700 |
| C  | -3.51579900 | -0.64071700 | -0.16939500 |
| C  | -3.14555300 | -0.31081600 | 1.17209100  |
| C  | -2.55933700 | 0.98116800  | 1.24581800  |
| P  | -2.49210200 | 1.83858400  | -0.30295000 |
| H  | -3.96724300 | -1.58792700 | -0.45368900 |
| H  | -3.36123400 | 0.29919400  | -2.15215300 |
| H  | -2.17289000 | 1.39265200  | 2.17449300  |
| H  | -3.28429600 | -0.97241700 | 2.02256700  |
| C  | 2.58510000  | -1.17844800 | -1.01017300 |
| C  | 2.33736300  | -1.73141700 | 0.27192400  |
| C  | 2.85843700  | -0.91516600 | 1.31974200  |
| C  | 3.43693500  | 0.27472800  | 0.82933100  |
| P  | 3.47489700  | 0.35605600  | -0.97273400 |
| H  | 1.82221300  | -2.67433500 | 0.44013900  |
| H  | 2.24227400  | -1.65134000 | -1.92695200 |
| H  | 3.86161400  | 1.03931400  | 1.47445600  |
| H  | 2.73567900  | -1.14573400 | 2.37525300  |
| Mn | -1.35297000 | -0.34973000 | -0.07685300 |
| Mn | 1.31664400  | 0.28403100  | 0.18801900  |
| O  | -1.12265500 | -3.25511100 | -0.59435000 |
| O  | -0.06800500 | -0.79767300 | 2.54934800  |
| C  | 1.11115200  | 2.08963500  | 0.32243900  |
| C  | -0.34709700 | 0.05100800  | -1.53982500 |
| C  | -1.19495200 | -2.11285000 | -0.39037900 |
| C  | -0.20067900 | -0.55810200 | 1.40086100  |
| O  | 1.06130800  | 3.24695200  | 0.43176300  |
| O  | 0.03728000  | 0.30464100  | -2.61422800 |

**4T-3 (C<sub>1</sub>) / BP86**

|   |             |             |             |
|---|-------------|-------------|-------------|
| C | -3.19982200 | 0.35628500  | -1.02135400 |
| C | -3.45857100 | -0.69595000 | -0.09299500 |
| C | -3.04550900 | -0.35604900 | 1.24060900  |
| C | -2.47628100 | 0.95502600  | 1.29404700  |
| P | -2.49401100 | 1.82688700  | -0.26589100 |
| H | -3.90060200 | -1.66071600 | -0.36467200 |
| H | -3.40007800 | 0.26238300  | -2.09388100 |
| H | -2.04865000 | 1.37379900  | 2.21129300  |
| H | -3.11793900 | -1.03470100 | 2.09667700  |
| C | 2.58748500  | -1.08619800 | -1.05304700 |
| C | 2.35711900  | -1.72823300 | 0.20090800  |
| C | 2.81427800  | -0.93098100 | 1.30285500  |
| C | 3.34318800  | 0.32018700  | 0.87834400  |

|    |             |             |             |
|----|-------------|-------------|-------------|
| P  | 3.41046100  | 0.49733800  | -0.93006600 |
| H  | 1.87291500  | -2.70465000 | 0.31320400  |
| H  | 2.26071700  | -1.51781400 | -2.00548600 |
| H  | 3.71410100  | 1.08332100  | 1.57063500  |
| H  | 2.67124000  | -1.21570700 | 2.35126900  |
| Mn | -1.32387300 | -0.33015300 | -0.08941700 |
| Mn | 1.27952500  | 0.22620100  | 0.19635100  |
| O  | -1.04122500 | -3.16224300 | -0.91071400 |
| O  | -0.06428500 | -1.12976900 | 2.46639700  |
| C  | 1.02589600  | 1.99385600  | 0.40675300  |
| C  | -0.30007400 | 0.22035600  | -1.48343500 |
| C  | -1.14146300 | -2.03311700 | -0.58205500 |
| C  | -0.15209800 | -0.71768800 | 1.34085800  |
| O  | 0.92757300  | 3.15764800  | 0.57959600  |
| O  | 0.07610800  | 0.55493500  | -2.56052400 |

#### 4T-4 (C<sub>1</sub>) / B3LYP

|    |             |             |             |
|----|-------------|-------------|-------------|
| C  | 2.90234200  | -1.06505400 | -1.10568900 |
| C  | 3.54713200  | -0.03072800 | -0.39357800 |
| C  | 3.27175300  | -0.08930500 | 1.01326400  |
| C  | 2.42242900  | -1.17830800 | 1.32942300  |
| P  | 1.98394200  | -2.18902500 | -0.06415400 |
| H  | 4.16225300  | 0.73654700  | -0.85671000 |
| H  | 2.95674700  | -1.15268600 | -2.18756600 |
| H  | 2.06540700  | -1.36116600 | 2.33948900  |
| H  | 3.65779000  | 0.62083100  | 1.73937700  |
| C  | -3.35685700 | -0.36952100 | 0.87380200  |
| C  | -2.44015200 | -1.24873000 | 1.49218400  |
| C  | -1.71548900 | -2.02053700 | 0.53841300  |
| C  | -2.13005200 | -1.76224900 | -0.79170300 |
| P  | -3.43947900 | -0.56989300 | -0.91948700 |
| H  | -2.24488400 | -1.27492800 | 2.56204700  |
| H  | -3.98228900 | 0.32352800  | 1.43030600  |
| H  | -1.66654600 | -2.24145500 | -1.65013300 |
| H  | -0.93236400 | -2.72652700 | 0.80144200  |
| Mn | 1.40304400  | 0.21869800  | -0.06588300 |
| Mn | -1.35946900 | 0.17753200  | 0.12555500  |
| O  | 1.86742200  | 3.11317700  | -0.49022100 |
| O  | 0.10214700  | 0.94784200  | 2.50577800  |
| C  | -1.76478600 | 1.94726100  | -0.00099100 |
| C  | 0.34664000  | 0.10279400  | -1.55091700 |
| C  | 1.65689100  | 1.98426600  | -0.32416200 |
| C  | 0.28147200  | 0.65308600  | 1.37796300  |
| O  | -2.10711000 | 3.05710700  | -0.07187400 |

|                                    |             |             |             |
|------------------------------------|-------------|-------------|-------------|
| O                                  | -0.03750500 | 0.00887600  | -2.65162100 |
| <b>4T-4 (C<sub>1</sub>) / BP86</b> |             |             |             |
| C                                  | 2.81876800  | -1.14486000 | -1.08642700 |
| C                                  | 3.47390400  | -0.00946600 | -0.53498200 |
| C                                  | 3.28611500  | 0.08237900  | 0.89681900  |
| C                                  | 2.48242100  | -0.98591100 | 1.38709900  |
| P                                  | 1.98939400  | -2.16835100 | 0.13253700  |
| H                                  | 4.03674700  | 0.72251400  | -1.12415400 |
| H                                  | 2.80169300  | -1.35354600 | -2.16137200 |
| H                                  | 2.17785900  | -1.05730500 | 2.43644500  |
| H                                  | 3.68766600  | 0.89032600  | 1.51730600  |
| C                                  | -3.24458300 | -0.34937600 | 0.93589200  |
| C                                  | -2.31751400 | -1.27163800 | 1.49769900  |
| C                                  | -1.66821200 | -2.06030600 | 0.48900300  |
| C                                  | -2.13619900 | -1.75700500 | -0.82177500 |
| P                                  | -3.41535600 | -0.50694200 | -0.87416200 |
| H                                  | -2.06305500 | -1.31724300 | 2.56276400  |
| H                                  | -3.82393500 | 0.36193000  | 1.53378600  |
| H                                  | -1.71794400 | -2.22420500 | -1.71950000 |
| H                                  | -0.88280600 | -2.79365400 | 0.70151800  |
| Mn                                 | 1.36702100  | 0.20276600  | -0.09172500 |
| Mn                                 | -1.29942900 | 0.12832000  | 0.12005000  |
| O                                  | 1.73365900  | 3.09822500  | -0.61321000 |
| O                                  | 0.14990700  | 1.05555700  | 2.48073900  |
| C                                  | -1.75065000 | 1.87181500  | 0.02751000  |
| C                                  | 0.29491200  | 0.02248000  | -1.54069300 |
| C                                  | 1.56161400  | 1.95224200  | -0.40357400 |
| C                                  | 0.20956500  | 0.70351400  | 1.33199900  |
| O                                  | -2.11562700 | 2.99119000  | -0.00759000 |
| O                                  | -0.09011900 | -0.10744400 | -2.66018500 |

**(C<sub>4</sub>H<sub>4</sub>P)<sub>2</sub>Mn<sub>2</sub>(CO)<sub>3</sub>**

**3S-1 (C<sub>1</sub>) / B3LYP**

|   |             |             |             |
|---|-------------|-------------|-------------|
| C | -2.80111500 | 0.70254300  | 1.14690500  |
| C | -2.64063900 | 1.56892200  | 0.03815500  |
| C | -2.73119600 | 0.86667700  | -1.20451500 |
| C | -2.95921700 | -0.51733100 | -1.01108700 |
| P | -3.11193800 | -0.99336500 | 0.70074000  |
| H | -2.41766900 | 2.62999600  | 0.11458500  |
| H | -2.69598900 | 1.03882200  | 2.17485100  |
| H | -2.99181000 | -1.22733600 | -1.83316900 |
| H | -2.58547300 | 1.33699600  | -2.17349000 |
| C | 2.95921400  | 0.51743500  | -1.01103600 |
| C | 2.73119500  | -0.86655300 | -1.20460600 |

|    |             |             |             |
|----|-------------|-------------|-------------|
| C  | 2.64064100  | -1.56892600 | 0.03799200  |
| C  | 2.80111600  | -0.70266100 | 1.14683100  |
| P  | 3.11193600  | 0.99329500  | 0.70084000  |
| H  | 2.58547300  | -1.33677300 | -2.17362900 |
| H  | 2.99180600  | 1.22752500  | -1.83304500 |
| H  | 2.69599100  | -1.03904500 | 2.17474200  |
| H  | 2.41767400  | -2.63000800 | 0.11431300  |
| Mn | -1.08333100 | 0.08122500  | -0.05481000 |
| Mn | 1.08332800  | -0.08122100 | -0.05481900 |
| C  | 0.00000000  | 0.00000000  | 1.57527100  |
| C  | 0.21440100  | 1.40338300  | -0.87343800 |
| C  | -0.21440000 | -1.40331200 | -0.87355100 |
| O  | -0.24026400 | -2.42008500 | -1.46665200 |
| O  | 0.00000000  | -0.00010700 | 2.75190600  |
| O  | 0.24026100  | 2.42020200  | -1.46645800 |

### 3S-1 (C1) / BP86

|    |             |             |             |
|----|-------------|-------------|-------------|
| C  | -2.77255300 | 0.71732300  | 1.14755800  |
| C  | -2.62381700 | 1.57670400  | 0.01790300  |
| C  | -2.71698700 | 0.85170500  | -1.22033900 |
| C  | -2.93588100 | -0.54104100 | -1.00162100 |
| P  | -3.07536600 | -0.99950400 | 0.72766800  |
| H  | -2.39510400 | 2.64632100  | 0.07828900  |
| H  | -2.65159600 | 1.06610500  | 2.17867400  |
| H  | -2.95580100 | -1.27311100 | -1.81603600 |
| H  | -2.56807600 | 1.31020700  | -2.20404500 |
| C  | 2.93588000  | 0.54114600  | -1.00156500 |
| C  | 2.71698000  | -0.85157500 | -1.22042900 |
| C  | 2.62381400  | -1.57670300 | 0.01773700  |
| C  | 2.77255800  | -0.71744300 | 1.14748300  |
| P  | 3.07537900  | 0.99942400  | 0.72776900  |
| H  | 2.56806600  | -1.30997800 | -2.20418200 |
| H  | 2.95580100  | 1.27330400  | -1.81590100 |
| H  | 2.65160500  | -1.06633500 | 2.17856200  |
| H  | 2.39509000  | -2.64632500 | 0.07800800  |
| Mn | -1.07971000 | 0.09080400  | -0.05858800 |
| Mn | 1.07970900  | -0.09079200 | -0.05859300 |
| C  | 0.00000000  | 0.00000000  | 1.56328000  |
| C  | 0.19273500  | 1.39538600  | -0.87404200 |
| C  | -0.19274700 | -1.39530900 | -0.87415200 |
| O  | -0.23718200 | -2.42711800 | -1.47903000 |
| O  | 0.00000000  | -0.00012400 | 2.75958800  |
| O  | 0.23718100  | 2.42724000  | -1.47884200 |

### 3S-2 (C1) /B3LYP

|    |             |             |             |
|----|-------------|-------------|-------------|
| C  | -1.59341600 | -1.87774400 | 0.86521600  |
| C  | -2.85362200 | -1.33699600 | 0.54069200  |
| C  | -2.93164900 | -0.96903800 | -0.85134700 |
| C  | -1.75008900 | -1.25587400 | -1.55113600 |
| P  | -0.47338900 | -2.03995700 | -0.54846000 |
| H  | -3.66244500 | -1.19157300 | 1.25119500  |
| H  | -1.32480000 | -2.18268600 | 1.87327600  |
| H  | -1.60557900 | -0.99021900 | -2.59511200 |
| H  | -3.80126400 | -0.49131900 | -1.29576800 |
| C  | 2.69792200  | 0.69253900  | 1.06676100  |
| C  | 2.70610100  | 1.40762300  | -0.15186900 |
| C  | 2.78741100  | 0.52151400  | -1.28658100 |
| C  | 2.83401900  | -0.83438200 | -0.89837600 |
| P  | 2.85258400  | -1.07403200 | 0.87072900  |
| H  | 2.63406200  | 2.48889700  | -0.23265500 |
| H  | 2.57700900  | 1.17837700  | 2.03139400  |
| H  | 2.83427600  | -1.65019600 | -1.61628100 |
| H  | 2.77237500  | 0.86311100  | -2.31816900 |
| Mn | -1.28452800 | 0.12480000  | 0.13354600  |
| Mn | 0.99849800  | 0.10103800  | -0.14749700 |
| C  | 0.18228000  | 1.25111500  | -1.27408100 |
| C  | -2.29786700 | 1.61932100  | 0.25268600  |
| C  | -0.45887000 | 0.59760700  | 1.67701100  |
| O  | -0.02111500 | 2.05848600  | -2.10537000 |
| O  | -0.14538500 | 0.88072200  | 2.76736500  |
| O  | -2.94526900 | 2.57896600  | 0.34838100  |

**3S-2 (C<sub>1</sub>) / BP86**

|   |             |             |             |
|---|-------------|-------------|-------------|
| C | 1.31487300  | -1.48633200 | -1.34666900 |
| C | 2.68613100  | -1.26053200 | -1.01595200 |
| C | 2.92575800  | -1.30241300 | 0.41011800  |
| C | 1.73777900  | -1.53575900 | 1.16102000  |
| P | 0.29447800  | -1.98852400 | 0.09757400  |
| H | 3.45788900  | -0.99759000 | -1.74708400 |
| H | 0.91899700  | -1.48285600 | -2.36649500 |
| H | 1.70504800  | -1.57634100 | 2.25476000  |
| H | 3.89243800  | -1.05805200 | 0.86326400  |
| C | -2.51470000 | 0.78366600  | -1.22571300 |
| C | -2.73700000 | 1.37436200  | 0.05923500  |
| C | -2.93974000 | 0.36922400  | 1.06282800  |
| C | -2.85368700 | -0.95038600 | 0.53352500  |
| P | -2.59622200 | -1.00242400 | -1.25001300 |
| H | -2.71553700 | 2.45112400  | 0.25630800  |
| H | -2.27890800 | 1.38569300  | -2.10948300 |
| H | -2.91079200 | -1.84402500 | 1.16383500  |

|    |             |            |             |
|----|-------------|------------|-------------|
| H  | -3.08749100 | 0.59257200 | 2.12522600  |
| Mn | 1.37318100  | 0.09797800 | -0.05355700 |
| Mn | -0.97107300 | 0.11270000 | 0.15298900  |
| C  | -0.34722600 | 0.53243500 | 1.78715600  |
| C  | 2.56169100  | 1.42887600 | -0.20237800 |
| C  | 0.07394000  | 1.49753100 | -0.66990000 |
| O  | -0.11781400 | 0.82274200 | 2.91268900  |
| O  | 0.01153500  | 2.56524000 | -1.21033800 |
| O  | 3.36189300  | 2.28985700 | -0.32224800 |

**3T-1 (C<sub>3</sub>) / B3LYP**

|    |             |             |             |
|----|-------------|-------------|-------------|
| C  | 1.47362200  | -1.45294100 | -1.56147900 |
| C  | 2.83165000  | -1.34020100 | -1.20478700 |
| C  | 3.02803500  | -1.31989600 | 0.20948300  |
| C  | 1.82551300  | -1.51248600 | 0.93970900  |
| P  | 0.42121600  | -1.81315000 | -0.13312000 |
| H  | 3.64219800  | -1.20972500 | -1.91845100 |
| H  | 1.12906700  | -1.49221000 | -2.59081200 |
| H  | 1.79105200  | -1.55743400 | 2.02427700  |
| H  | 4.00039800  | -1.18509500 | 0.67631400  |
| C  | -1.48287000 | 2.02328700  | -0.16545300 |
| C  | -2.73962900 | 1.43111300  | -0.41397900 |
| C  | -2.67735200 | 0.46137300  | -1.47524300 |
| C  | -1.38901800 | 0.32707200  | -2.01324900 |
| P  | -0.21564100 | 1.50989400  | -1.32824100 |
| H  | -3.64469400 | 1.66118000  | 0.14090200  |
| H  | -1.31471000 | 2.76255000  | 0.61253700  |
| H  | -1.15135800 | -0.37206000 | -2.80907100 |
| H  | -3.53447000 | -0.12593000 | -1.79534100 |
| Mn | 1.55836200  | 0.32282200  | -0.25424800 |
| Mn | -1.31526100 | -0.11712900 | 0.16514600  |
| C  | 2.32045900  | 1.62125500  | 0.74828200  |
| C  | -2.52858800 | -1.32377000 | 0.71841100  |
| O  | 2.85076100  | 2.41880300  | 1.42008900  |
| O  | -3.33634100 | -2.08351800 | 1.07256200  |
| C  | -0.85850900 | 0.20019800  | 1.87569900  |
| O  | -0.62673200 | 0.44411600  | 2.99025500  |

**3T-1 (C<sub>3</sub>) / BP86**

|   |             |            |             |
|---|-------------|------------|-------------|
| C | -1.51284900 | 1.31703400 | 1.26896000  |
| C | -1.75593200 | 2.61550900 | 0.73022200  |
| C | -1.75593200 | 2.61550900 | -0.73022200 |
| C | -1.51284900 | 1.31703400 | -1.26896000 |
| P | -1.35573900 | 0.07267400 | 0.00000000  |
| H | -1.95681500 | 3.50645000 | 1.33323300  |
| H | -1.43428700 | 1.09608700 | 2.33837800  |

|    |             |             |             |
|----|-------------|-------------|-------------|
| H  | -1.43428700 | 1.09608700  | -2.33837800 |
| H  | -1.95681500 | 3.50645000  | -1.33323300 |
| C  | 1.69823800  | -0.97818600 | -1.26903900 |
| C  | 1.94884600  | -2.28246100 | -0.71758900 |
| C  | 1.94884600  | -2.28246100 | 0.71758900  |
| C  | 1.69823800  | -0.97818600 | 1.26903900  |
| P  | 1.57445700  | 0.26043000  | 0.00000000  |
| H  | 2.12158400  | -3.17521400 | -1.32647500 |
| H  | 1.64526300  | -0.76318700 | -2.33980700 |
| H  | 1.64526300  | -0.76318700 | 2.33980700  |
| H  | 2.12158400  | -3.17521400 | 1.32647500  |
| Mn | 0.15566000  | 2.03498300  | 0.00000000  |
| Mn | 0.03604000  | -1.68218300 | 0.00000000  |
| C  | 1.01583900  | 3.61507300  | 0.00000000  |
| C  | -0.82613100 | -2.58588500 | 1.27134000  |
| O  | 1.51537100  | 4.68951800  | 0.00000000  |
| O  | -1.35430300 | -3.21147300 | 2.12414300  |
| C  | -0.82613100 | -2.58588500 | -1.27134000 |
| O  | -1.35430300 | -3.21147300 | -2.12414300 |

**3T-2 (C<sub>1</sub>) / B3LYP**

|    |             |             |             |
|----|-------------|-------------|-------------|
| C  | 1.82288500  | -1.30878300 | -1.42487700 |
| C  | 3.01590100  | -0.84280900 | -0.84816700 |
| C  | 3.07309600  | -1.06148900 | 0.57128400  |
| C  | 1.88674800  | -1.65518400 | 1.05780200  |
| P  | 0.71804100  | -2.10196700 | -0.24886000 |
| H  | 3.80311900  | -0.34334400 | -1.40745500 |
| H  | 1.58857100  | -1.19189900 | -2.47904100 |
| H  | 1.72626600  | -1.88344600 | 2.10787600  |
| H  | 3.91410500  | -0.77432800 | 1.19597200  |
| C  | -2.72321000 | 0.11006100  | 1.36123600  |
| C  | -2.69113700 | -1.24333800 | 0.93988800  |
| C  | -2.99066300 | -1.38983900 | -0.45411900 |
| C  | -3.16085900 | -0.15030900 | -1.09055700 |
| P  | -3.06737400 | 1.25306900  | 0.04902400  |
| H  | -2.48743400 | -2.08406500 | 1.59959000  |
| H  | -2.50156900 | 0.41420100  | 2.38095800  |
| H  | -3.34080400 | -0.04297200 | -2.15689000 |
| H  | -2.99415200 | -2.34953300 | -0.96658300 |
| Mn | 1.34731000  | 0.20528400  | 0.15280500  |
| Mn | -1.06878300 | -0.17318500 | -0.17687000 |
| C  | -0.29847400 | 0.89100700  | -1.44170800 |
| C  | 2.18929600  | 1.79430800  | -0.06704400 |
| C  | 0.67103200  | 0.80302400  | 1.69642300  |
| O  | -0.08372900 | 1.58647000  | -2.36668800 |



|                                     |             |             |             |
|-------------------------------------|-------------|-------------|-------------|
| O                                   | 0.31557400  | 1.16912900  | 2.74729600  |
| O                                   | 2.74328400  | 2.80771500  | -0.19013900 |
| <b>3T-2 (C<sub>1</sub>) / BP86</b>  |             |             |             |
| C                                   | 1.80754800  | -1.30361500 | -1.41104200 |
| C                                   | 2.99456600  | -0.77951300 | -0.84194400 |
| C                                   | 3.06720800  | -0.97088900 | 0.58757600  |
| C                                   | 1.88324800  | -1.57755500 | 1.10073700  |
| P                                   | 0.70478000  | -2.08247500 | -0.20237400 |
| H                                   | 3.76821300  | -0.26188600 | -1.41953700 |
| H                                   | 1.56033200  | -1.21653300 | -2.47345500 |
| H                                   | 1.72810100  | -1.79156700 | 2.16314500  |
| H                                   | 3.90591200  | -0.63845700 | 1.20751700  |
| C                                   | -2.63725100 | 0.21848300  | 1.34665300  |
| C                                   | -2.60080200 | -1.17358800 | 1.05234100  |
| C                                   | -2.85154200 | -1.44517000 | -0.34278200 |
| C                                   | -3.02034500 | -0.26117900 | -1.10053600 |
| P                                   | -2.95212400 | 1.25021400  | -0.08939900 |
| H                                   | -2.39237600 | -1.95605100 | 1.79137500  |
| H                                   | -2.42646700 | 0.62280300  | 2.34221100  |
| H                                   | -3.16943100 | -0.25028900 | -2.18498300 |
| H                                   | -2.81637700 | -2.45250800 | -0.77404500 |
| Mn                                  | 1.30143900  | 0.20770900  | 0.15030000  |
| Mn                                  | -1.02656200 | -0.18302400 | -0.13469800 |
| C                                   | -0.29131300 | 0.74637500  | -1.49794000 |
| C                                   | 2.03674100  | 1.83294500  | -0.05959900 |
| C                                   | 0.56284300  | 0.78468600  | 1.65731400  |
| O                                   | -0.10492400 | 1.35858300  | -2.50314100 |
| O                                   | 0.20270400  | 1.16471000  | 2.72272400  |
| O                                   | 2.52408500  | 2.89988200  | -0.17087700 |
| <b>3T-3 (C<sub>1</sub>) / B3LYP</b> |             |             |             |
| C                                   | -1.53749000 | -1.91696800 | 0.87536300  |
| C                                   | -2.84122500 | -1.45697500 | 0.58382600  |
| C                                   | -2.96492200 | -1.03856000 | -0.78516000 |
| C                                   | -1.78439400 | -1.22472800 | -1.52402900 |
| P                                   | -0.46111400 | -1.99203800 | -0.57617700 |
| H                                   | -3.64444500 | -1.39261000 | 1.31231800  |
| H                                   | -1.23284400 | -2.25594800 | 1.86155500  |
| H                                   | -1.68257800 | -0.93300500 | -2.56524300 |
| H                                   | -3.87170200 | -0.59912100 | -1.19352900 |
| C                                   | 2.71018400  | 0.55034800  | 1.21764800  |
| C                                   | 2.70743900  | 1.48595300  | 0.15954600  |
| C                                   | 3.02062300  | 0.86517700  | -1.10846800 |
| C                                   | 3.23052400  | -0.51580500 | -0.98855800 |
| P                                   | 3.05331700  | -1.11335100 | 0.68668300  |

|    |             |             |             |
|----|-------------|-------------|-------------|
| H  | 2.52150200  | 2.55103900  | 0.27352000  |
| H  | 2.46895600  | 0.81641100  | 2.24350000  |
| H  | 3.41608400  | -1.16276100 | -1.84250500 |
| H  | 3.06084400  | 1.41532700  | -2.04573500 |
| Mn | -1.36366700 | 0.11344200  | 0.21046700  |
| Mn | 1.06061800  | 0.05673100  | -0.26817600 |
| C  | 0.08673500  | 1.16330600  | -1.35414600 |
| C  | -0.69818500 | 0.62082000  | 1.79070800  |
| C  | -2.41302600 | 1.58910800  | 0.20883000  |
| O  | -0.24187000 | 1.94398200  | -2.17365700 |
| O  | -3.09638200 | 2.52873000  | 0.22291500  |
| O  | -0.34177300 | 0.92192600  | 2.86173100  |

**3T-3 (C<sub>1</sub>) / BP86**

|    |             |             |             |
|----|-------------|-------------|-------------|
| C  | -1.50272100 | -1.90280400 | 0.84536100  |
| C  | -2.81745500 | -1.44416400 | 0.54307300  |
| C  | -2.92774800 | -0.99328000 | -0.82423100 |
| C  | -1.73609700 | -1.17803000 | -1.56916900 |
| P  | -0.39834800 | -1.94156300 | -0.60971700 |
| H  | -3.63090700 | -1.38360200 | 1.27315400  |
| H  | -1.19786700 | -2.26300800 | 1.83301800  |
| H  | -1.62316300 | -0.87013100 | -2.61297500 |
| H  | -3.83558000 | -0.53592800 | -1.23277700 |
| C  | 2.59517300  | 0.57498900  | 1.23317900  |
| C  | 2.60696700  | 1.49691100  | 0.13685900  |
| C  | 2.90194300  | 0.83967500  | -1.12001300 |
| C  | 3.06565200  | -0.55470800 | -0.96207900 |
| P  | 2.91342600  | -1.11633100 | 0.75003500  |
| H  | 2.42312500  | 2.57333700  | 0.22650100  |
| H  | 2.36268800  | 0.87342300  | 2.26072700  |
| H  | 3.19846700  | -1.23727500 | -1.80882500 |
| H  | 2.93102200  | 1.36298100  | -2.08196400 |
| Mn | -1.32009100 | 0.09987700  | 0.20057600  |
| Mn | 1.01864800  | 0.08915000  | -0.20773600 |
| C  | 0.08078100  | 1.08669600  | -1.39691500 |
| C  | -0.60108000 | 0.55412500  | 1.75986000  |
| C  | -2.28308900 | 1.61669900  | 0.24508200  |
| O  | -0.22403600 | 1.81206200  | -2.29397600 |
| O  | -2.91616900 | 2.60943900  | 0.29461100  |
| O  | -0.24877500 | 0.83428500  | 2.85828200  |

**3T-4 (C<sub>1</sub>) / B3LYP**

|   |             |             |             |
|---|-------------|-------------|-------------|
| C | -3.08034100 | 0.41524100  | -1.11768400 |
| C | -2.74803300 | -0.95587500 | -1.25918100 |
| C | -2.67070000 | -1.60918800 | 0.00101300  |
| C | -3.02494700 | -0.74943900 | 1.08139100  |

|                                    |             |             |             |
|------------------------------------|-------------|-------------|-------------|
| P                                  | -3.50048400 | 0.88238200  | 0.57789400  |
| H                                  | -2.48620400 | -1.43001600 | -2.20219400 |
| H                                  | -3.15186100 | 1.09813900  | -1.96014100 |
| H                                  | -2.99562500 | -1.07999900 | 2.11684300  |
| H                                  | -2.36067200 | -2.64427900 | 0.12820900  |
| C                                  | 2.83949600  | 0.34863300  | 1.34075900  |
| C                                  | 2.41895400  | 1.56586200  | 0.74865900  |
| C                                  | 2.56113600  | 1.52801500  | -0.67451000 |
| C                                  | 3.08001300  | 0.29796200  | -1.13183800 |
| P                                  | 3.46406000  | -0.85718800 | 0.18281800  |
| H                                  | 2.02052400  | 2.41498100  | 1.29642100  |
| H                                  | 2.77062100  | 0.16552100  | 2.41010600  |
| H                                  | 3.21445100  | 0.07557600  | -2.18724500 |
| H                                  | 2.24293100  | 2.33726700  | -1.32664000 |
| Mn                                 | -1.21977400 | 0.10849600  | 0.04244700  |
| Mn                                 | 1.16852100  | -0.05205200 | -0.05052400 |
| C                                  | 0.38138500  | -0.86842000 | 1.36913800  |
| C                                  | 0.68659400  | -1.28069800 | -1.28068900 |
| C                                  | -0.52311300 | 1.74630300  | -0.29858700 |
| O                                  | 0.17684800  | -1.44541900 | 2.36981300  |
| O                                  | -0.29206800 | 2.87115700  | -0.54678700 |
| O                                  | 0.49657700  | -2.09531200 | -2.09239500 |
| <b>3T-4 (C<sub>1</sub>) / BP86</b> |             |             |             |
| C                                  | -3.03542100 | 0.65380700  | -0.99147600 |
| C                                  | -2.79555600 | -0.72186100 | -1.31337900 |
| C                                  | -2.72413800 | -1.56331100 | -0.15428300 |
| C                                  | -2.88364600 | -0.80212200 | 1.03974800  |
| P                                  | -3.23385800 | 0.95033200  | 0.77735600  |
| H                                  | -2.60128300 | -1.08445800 | -2.33002400 |
| H                                  | -3.09846000 | 1.44343200  | -1.74719400 |
| H                                  | -2.75487000 | -1.24011300 | 2.03627400  |
| H                                  | -2.49334300 | -2.63359100 | -0.18655700 |
| C                                  | 2.85263900  | 0.33110100  | 1.30057300  |
| C                                  | 2.50740800  | 1.56517800  | 0.67018800  |
| C                                  | 2.57246000  | 1.46568200  | -0.75897900 |
| C                                  | 2.96325800  | 0.15930700  | -1.18026400 |
| P                                  | 3.33718300  | -0.97554400 | 0.16452100  |
| H                                  | 2.17612200  | 2.46339900  | 1.20192300  |
| H                                  | 2.80421700  | 0.18981700  | 2.38586600  |
| H                                  | 3.01107600  | -0.12984900 | -2.23587600 |
| H                                  | 2.29288500  | 2.27980300  | -1.43582500 |
| Mn                                 | -1.18671600 | 0.03061500  | -0.06198700 |
| Mn                                 | 1.12270800  | 0.01449100  | -0.00176300 |
| C                                  | 0.33049700  | -0.93554700 | 1.32352100  |

|   |             |             |             |
|---|-------------|-------------|-------------|
| C | 0.44643100  | -1.13900000 | -1.21939600 |
| C | -0.33070600 | 1.63754200  | -0.21582400 |
| O | 0.09774700  | -1.61231100 | 2.27451100  |
| O | -0.19686600 | 2.81935900  | -0.35801500 |
| O | 0.26094900  | -1.94986600 | -2.06969000 |

**3T-5 (C<sub>1</sub>) / B3LYP**

|    |             |             |             |
|----|-------------|-------------|-------------|
| C  | -2.95571600 | -1.07239600 | -0.61964400 |
| C  | -2.79966300 | -1.28589300 | 0.77410500  |
| C  | -2.98012700 | -0.08880900 | 1.53831400  |
| C  | -3.18692500 | 1.03324100  | 0.71580500  |
| P  | -3.28043800 | 0.61943800  | -1.04367100 |
| H  | -2.57618400 | -2.25181900 | 1.22215300  |
| H  | -2.83820600 | -1.86741000 | -1.35160000 |
| H  | -3.29401700 | 2.04474100  | 1.09841900  |
| H  | -2.87899700 | -0.05006800 | 2.62086000  |
| C  | 2.72798800  | 1.27384000  | -0.68746700 |
| C  | 2.90141300  | 0.09264700  | -1.44142300 |
| C  | 3.14231500  | -1.04739500 | -0.59544800 |
| C  | 3.13946400  | -0.69277600 | 0.77021800  |
| P  | 2.89658200  | 1.06114700  | 1.06985700  |
| H  | 2.84602700  | 0.04163000  | -2.52564300 |
| H  | 2.45692400  | 2.22199500  | -1.14397500 |
| H  | 3.25866900  | -1.42523300 | 1.56420500  |
| H  | 3.28445800  | -2.05867700 | -0.96711400 |
| Mn | -1.18412900 | 0.13985200  | 0.15120000  |
| Mn | 1.17585200  | -0.21929000 | -0.14094500 |
| C  | -0.36821100 | 1.70553100  | -0.28238100 |
| C  | 0.46099700  | -0.91484300 | 1.37390500  |
| C  | 0.43381200  | -1.33747200 | -1.34259000 |
| O  | -0.05516900 | 2.80235700  | -0.55728300 |
| O  | 0.08053000  | -2.09834400 | -2.15381000 |
| O  | 0.30139200  | -1.43801700 | 2.41273700  |

**3T-5 (C<sub>1</sub>) / BP86**

|   |             |             |             |
|---|-------------|-------------|-------------|
| C | -3.01163800 | -0.78989800 | -0.87697500 |
| C | -2.88607900 | -1.34815300 | 0.42785700  |
| C | -2.82698300 | -0.32096400 | 1.42976500  |
| C | -2.92654600 | 0.99624400  | 0.88804900  |
| P | -3.13121600 | 1.01315100  | -0.90275500 |
| H | -2.77448700 | -2.41738600 | 0.63854000  |
| H | -2.98350500 | -1.40337800 | -1.78434500 |
| H | -2.86386000 | 1.90360300  | 1.49744000  |
| H | -2.63643600 | -0.52843400 | 2.49009000  |
| C | 2.64273500  | 1.26124700  | -0.83287200 |
| C | 2.51761400  | 0.12450300  | -1.68682900 |

|    |             |             |             |
|----|-------------|-------------|-------------|
| C  | 2.80934300  | -1.10498100 | -0.99688300 |
| C  | 3.14482900  | -0.87544800 | 0.36431100  |
| P  | 3.16355900  | 0.87123200  | 0.83213700  |
| H  | 2.18878400  | 0.17066800  | -2.73124000 |
| H  | 2.40071400  | 2.27810200  | -1.15818700 |
| H  | 3.33874200  | -1.69007600 | 1.07040500  |
| H  | 2.72639200  | -2.09539100 | -1.45672300 |
| Mn | -1.18732200 | -0.00979300 | 0.02188300  |
| Mn | 1.11639700  | -0.10503900 | -0.04601700 |
| C  | -0.12309200 | 1.52787200  | -0.10439600 |
| C  | 0.60738600  | -0.69939500 | 1.57338400  |
| C  | 0.00867600  | -1.37108300 | -0.89407800 |
| O  | -0.00071700 | 2.71935200  | -0.17085400 |
| O  | -0.14770800 | -2.34771900 | -1.57430300 |
| O  | 0.41769600  | -1.12317300 | 2.66373900  |

**(C<sub>4</sub>H<sub>4</sub>P)<sub>2</sub>Mn<sub>2</sub>(CO)<sub>2</sub>**

**2T-1 (C<sub>2</sub>) / B3LYP**

|    |             |             |             |
|----|-------------|-------------|-------------|
| C  | 0.29974100  | 1.71744800  | -1.86427600 |
| C  | -0.29974100 | 2.89727200  | -1.36443100 |
| C  | 0.03444800  | 3.17487700  | -0.00542500 |
| C  | 0.88220300  | 2.17140400  | 0.54743500  |
| P  | 1.38790000  | 0.94604000  | -0.66485500 |
| H  | -0.98567200 | 3.51292000  | -1.94343600 |
| H  | 0.15128700  | 1.35760200  | -2.87779600 |
| H  | 1.23957600  | 2.18130400  | 1.57240500  |
| H  | -0.33251400 | 4.03591300  | 0.54574300  |
| C  | -0.88220300 | -2.17140400 | 0.54743500  |
| C  | -0.03444800 | -3.17487700 | -0.00542500 |
| C  | 0.29974100  | -2.89727200 | -1.36443100 |
| C  | -0.29974100 | -1.71744800 | -1.86427600 |
| P  | -1.38790000 | -0.94604000 | -0.66485500 |
| H  | 0.33251400  | -4.03591300 | 0.54574300  |
| H  | -1.23957600 | -2.18130400 | 1.57240500  |
| H  | -0.15128700 | -1.35760200 | -2.87779600 |
| H  | 0.98567200  | -3.51292000 | -1.94343600 |
| Mn | -0.89381600 | 1.20983300  | -0.07207200 |
| Mn | 0.89381600  | -1.20983300 | -0.07207200 |
| C  | 1.62500000  | -1.13065700 | 1.56450000  |
| C  | -1.62500000 | 1.13065700  | 1.56450000  |
| O  | 2.05720100  | -1.12158900 | 2.65136100  |
| O  | -2.05720100 | 1.12158900  | 2.65136100  |

**2T-1 (C<sub>2</sub>) / BP86**

|   |            |            |             |
|---|------------|------------|-------------|
| C | 0.24913000 | 1.71368500 | -1.86735400 |
|---|------------|------------|-------------|

|    |             |             |             |
|----|-------------|-------------|-------------|
| C  | -0.36175200 | 2.88831800  | -1.33819300 |
| C  | -0.01448500 | 3.15175800  | 0.02983400  |
| C  | 0.86373700  | 2.14581400  | 0.56333500  |
| P  | 1.38448400  | 0.94002500  | -0.68548700 |
| H  | -1.07611500 | 3.50284200  | -1.89984300 |
| H  | 0.09984900  | 1.36464600  | -2.89358100 |
| H  | 1.24151800  | 2.13925400  | 1.58975500  |
| H  | -0.40109100 | 3.99872000  | 0.60561300  |
| C  | -0.86373700 | -2.14581400 | 0.56333500  |
| C  | 0.01448500  | -3.15175800 | 0.02983400  |
| C  | 0.36175200  | -2.88831800 | -1.33819300 |
| C  | -0.24913000 | -1.71368500 | -1.86735400 |
| P  | -1.38448400 | -0.94002500 | -0.68548700 |
| H  | 0.40109100  | -3.99872000 | 0.60561300  |
| H  | -1.24151800 | -2.13925400 | 1.58975500  |
| H  | -0.09984900 | -1.36464600 | -2.89358100 |
| H  | 1.07611500  | -3.50284200 | -1.89984300 |
| Mn | -0.86373700 | 1.17700900  | -0.07746200 |
| Mn | 0.86373700  | -1.17700900 | -0.07746200 |
| C  | 1.58543300  | -1.08855200 | 1.54754900  |
| C  | -1.58543300 | 1.08855200  | 1.54754900  |
| O  | 2.02184900  | -1.08070700 | 2.65073700  |
| O  | -2.02184900 | 1.08070700  | 2.65073700  |

**2T-2 (C<sub>1</sub>) / B3LYP**

|    |             |             |             |
|----|-------------|-------------|-------------|
| C  | 1.70342100  | -1.42999600 | -1.15446800 |
| C  | 2.98785100  | -0.88466800 | -0.89711700 |
| C  | 3.29052200  | -0.80279100 | 0.49554400  |
| C  | 2.20559100  | -1.19679300 | 1.30836900  |
| P  | 0.83727400  | -1.89713600 | 0.33913800  |
| H  | 3.67640400  | -0.56948900 | -1.67693200 |
| H  | 1.30929500  | -1.58184200 | -2.15482900 |
| H  | 2.23456400  | -1.19433900 | 2.39424900  |
| H  | 4.22614700  | -0.40312500 | 0.87943200  |
| C  | -2.48703600 | 0.69709500  | -1.15378500 |
| C  | -2.63718100 | 1.30637900  | 0.13986800  |
| C  | -3.04920700 | 0.36123000  | 1.12572300  |
| C  | -3.14590900 | -0.94262800 | 0.59995300  |
| P  | -2.87622600 | -1.04645300 | -1.17758500 |
| H  | -2.48285000 | 2.36334200  | 0.34306700  |
| H  | -2.20669300 | 1.26738100  | -2.03613700 |
| H  | -3.37471000 | -1.80822000 | 1.21824900  |
| H  | -3.18416200 | 0.61159000  | 2.17602400  |
| Mn | 1.44165400  | 0.41703500  | 0.07193900  |
| Mn | -0.98461700 | -0.15142100 | 0.15463400  |

|   |            |            |             |
|---|------------|------------|-------------|
| C | 1.52265000 | 1.76561000 | -1.15392200 |
| C | 0.51929700 | 1.38585100 | 1.33071400  |
| O | 1.56474900 | 2.60014900 | -1.96545500 |
| O | 0.12279600 | 2.05890800 | 2.20595200  |

**2T-2 (C<sub>1</sub>) / BP86**

|    |             |             |             |
|----|-------------|-------------|-------------|
| C  | -1.68613500 | -1.50645200 | 1.11010200  |
| C  | -2.89750200 | -0.76988000 | 0.93746200  |
| C  | -3.20093000 | -0.50811500 | -0.43943200 |
| C  | -2.18516200 | -1.00280200 | -1.31135400 |
| P  | -0.88215400 | -1.93506500 | -0.44699900 |
| H  | -3.51991300 | -0.42183600 | 1.76906700  |
| H  | -1.28195200 | -1.77949400 | 2.08948700  |
| H  | -2.21100900 | -0.87313300 | -2.39815000 |
| H  | -4.07801100 | 0.05481100  | -0.77489500 |
| C  | 2.35893900  | 0.77734500  | 0.89988800  |
| C  | 2.55790200  | 1.15688900  | -0.48478100 |
| C  | 2.87642600  | 0.02063500  | -1.30501200 |
| C  | 2.87335400  | -1.19296600 | -0.57714100 |
| P  | 2.56656600  | -1.00169300 | 1.19703300  |
| H  | 2.47289400  | 2.18077200  | -0.86570400 |
| H  | 2.12600000  | 1.50009200  | 1.68912300  |
| H  | 2.98708800  | -2.17112100 | -1.05813300 |
| H  | 2.98994400  | 0.08093000  | -2.39458000 |
| Mn | -1.19992400 | 0.36009800  | 0.03955000  |
| Mn | 0.88461100  | -0.10364000 | -0.22474100 |
| C  | -0.96750700 | 1.57044200  | 1.34425300  |
| C  | -0.76743900 | 1.58605900  | -1.19245000 |
| O  | -0.78946500 | 2.37243100  | 2.19406500  |
| O  | -0.54054100 | 2.41281600  | -2.01483500 |

**2T-3 (C<sub>s</sub>) / B3LYP**

|   |             |             |             |
|---|-------------|-------------|-------------|
| C | -0.64549000 | 1.23329000  | 2.80153900  |
| C | -1.34053400 | -0.00361300 | 2.90507600  |
| C | -0.45179400 | -1.11028800 | 3.01670100  |
| C | 0.90402100  | -0.71249700 | 2.94860500  |
| P | 1.12694000  | 1.06626500  | 2.86766300  |
| H | -2.42248300 | -0.09979100 | 2.86774900  |
| H | -1.16210800 | 2.18151200  | 2.67546200  |
| H | 1.73077200  | -1.41756900 | 2.95191700  |
| H | -0.78512000 | -2.14549600 | 3.05147900  |
| C | -0.64549000 | 1.23329000  | -2.80153900 |
| C | -1.34053400 | -0.00361300 | -2.90507600 |
| C | -0.45179400 | -1.11028800 | -3.01670100 |
| C | 0.90402100  | -0.71249700 | -2.94860500 |
| P | 1.12694000  | 1.06626500  | -2.86766300 |

|    |             |             |             |
|----|-------------|-------------|-------------|
| H  | -2.42248300 | -0.09979100 | -2.86774900 |
| H  | -1.16210800 | 2.18151200  | -2.67546200 |
| H  | 1.73077200  | -1.41756900 | -2.95191700 |
| H  | -0.78512000 | -2.14549600 | -3.05147900 |
| Mn | -0.08184100 | -0.01373400 | 1.10210700  |
| Mn | -0.08184100 | -0.01373400 | -1.10210700 |
| C  | -1.68158200 | -0.26553900 | 0.00000000  |
| O  | -2.84420700 | -0.47822100 | 0.00000000  |
| C  | 1.33235500  | -0.78977000 | 0.00000000  |
| O  | 2.35203800  | -1.38295300 | 0.00000000  |

**2T-3 (C<sub>s</sub>) / BP86**

|    |             |             |             |
|----|-------------|-------------|-------------|
| C  | 0.58347600  | -1.24287200 | 2.84769500  |
| C  | 1.36426700  | -0.04284100 | 2.85375800  |
| C  | 0.54645400  | 1.13405800  | 2.88727700  |
| C  | -0.84299200 | 0.81656400  | 2.85354600  |
| P  | -1.18712300 | -0.96081000 | 2.90166800  |
| H  | 2.45747300  | -0.02023500 | 2.78942000  |
| H  | 1.03799400  | -2.23712700 | 2.76975500  |
| H  | -1.63249400 | 1.57339300  | 2.80058700  |
| H  | 0.94965900  | 2.15208800  | 2.83543200  |
| C  | 0.58347600  | -1.24287200 | -2.84769500 |
| C  | 1.36426700  | -0.04284100 | -2.85375800 |
| C  | 0.54645400  | 1.13405800  | -2.88727700 |
| C  | -0.84299200 | 0.81656400  | -2.85354600 |
| P  | -1.18712300 | -0.96081000 | -2.90166800 |
| H  | 2.45747300  | -0.02023500 | -2.78942000 |
| H  | 1.03799400  | -2.23712700 | -2.76975500 |
| H  | -1.63249400 | 1.57339300  | -2.80058700 |
| H  | 0.94965900  | 2.15208800  | -2.83543200 |
| Mn | 0.07921000  | -0.05757900 | 1.09797900  |
| Mn | 0.07921000  | -0.05757900 | -1.09797900 |
| C  | 1.65665300  | 0.23906400  | 0.00000000  |
| O  | 2.83279500  | 0.48526500  | 0.00000000  |
| C  | -1.29744400 | 0.75166600  | 0.00000000  |
| O  | -2.32551900 | 1.37019600  | 0.00000000  |

**2S-1 (C<sub>1</sub>) / B3LYP**

|   |            |             |             |
|---|------------|-------------|-------------|
| C | 2.35901400 | -1.50586800 | 0.36129800  |
| C | 3.26806500 | -0.74615600 | -0.39605700 |
| C | 3.31153600 | 0.63374900  | -0.01477500 |
| C | 2.39482000 | 0.89584700  | 1.04095300  |
| P | 1.50083700 | -0.55599000 | 1.63192500  |
| H | 3.82959700 | -1.14992100 | -1.23736500 |
| H | 2.15752500 | -2.55384300 | 0.15539500  |
| H | 2.24553800 | 1.89033400  | 1.45395500  |



|                                     |             |             |             |
|-------------------------------------|-------------|-------------|-------------|
| H                                   | 3.95679800  | 1.37895500  | -0.47054400 |
| C                                   | -2.48791500 | 1.18589400  | 0.71100200  |
| C                                   | -2.06554100 | 0.36476100  | 1.78580700  |
| C                                   | -2.17423600 | -1.02874800 | 1.47293200  |
| C                                   | -2.69419000 | -1.22907700 | 0.17024400  |
| P                                   | -3.09445400 | 0.29057000  | -0.70262900 |
| H                                   | -1.64192500 | 0.74105800  | 2.71412500  |
| H                                   | -2.39270900 | 2.26910300  | 0.72735200  |
| H                                   | -2.80506800 | -2.21714800 | -0.26876900 |
| H                                   | -1.86044300 | -1.82831200 | 2.13875600  |
| Mn                                  | 1.27751200  | 0.18605300  | -0.59679200 |
| Mn                                  | -0.84712800 | -0.08742500 | 0.08112400  |
| C                                   | -0.38569000 | -1.14576200 | -1.29154500 |
| O                                   | -0.35727000 | -1.91366100 | -2.18734300 |
| C                                   | 0.44278500  | 1.77552100  | -0.77775200 |
| O                                   | 0.08770100  | 2.88671100  | -0.89181800 |
| <b>2S-1 (C<sub>1</sub>) / BP86</b>  |             |             |             |
| C                                   | 2.62249000  | -1.29298200 | 0.48847900  |
| C                                   | 3.06412700  | -0.81230900 | -0.78124500 |
| C                                   | 3.10797000  | 0.62301300  | -0.82307200 |
| C                                   | 2.70111400  | 1.20308900  | 0.41747000  |
| P                                   | 2.28761900  | 0.00334000  | 1.69815200  |
| H                                   | 3.26847800  | -1.46045800 | -1.64115300 |
| H                                   | 2.44947800  | -2.35720700 | 0.68197700  |
| H                                   | 2.59955900  | 2.28569800  | 0.54992800  |
| H                                   | 3.35305000  | 1.20680100  | -1.71756000 |
| C                                   | -2.82632200 | 1.05361100  | -0.35251000 |
| C                                   | -2.38433900 | 1.35647300  | 0.97946900  |
| C                                   | -2.24432100 | 0.17069000  | 1.77843100  |
| C                                   | -2.54477600 | -1.01542900 | 1.03876700  |
| P                                   | -3.10488500 | -0.68988200 | -0.64716700 |
| H                                   | -2.13428800 | 2.36445200  | 1.32839500  |
| H                                   | -2.93164900 | 1.82388800  | -1.12358100 |
| H                                   | -2.43216300 | -2.02413600 | 1.45020400  |
| H                                   | -1.84664200 | 0.17303900  | 2.80064400  |
| Mn                                  | 1.08229300  | -0.01686300 | -0.35813300 |
| Mn                                  | -0.93576100 | 0.06214900  | 0.08881000  |
| C                                   | -0.10261400 | -1.51222400 | -0.69035800 |
| O                                   | -0.21151100 | -2.65986000 | -1.01687800 |
| C                                   | 0.02252200  | 1.49215500  | -0.86053800 |
| O                                   | -0.06664400 | 2.60453100  | -1.29935900 |
| <b>2S-2 (C<sub>1</sub>) / B3LYP</b> |             |             |             |
| C                                   | 2.98921000  | -0.41877600 | -0.77915000 |
| C                                   | 2.73918900  | 0.97406500  | -0.88861900 |

|                                    |             |             |             |
|------------------------------------|-------------|-------------|-------------|
| C                                  | 2.48131900  | 1.56206800  | 0.39073100  |
| C                                  | 2.52934900  | 0.60628900  | 1.43580700  |
| P                                  | 2.95429800  | -1.03920600 | 0.90424400  |
| H                                  | 2.70883600  | 1.52296700  | -1.82595900 |
| H                                  | 3.16025800  | -1.05398900 | -1.64399500 |
| H                                  | 2.28066300  | 0.85448400  | 2.46558200  |
| H                                  | 2.20759600  | 2.60529300  | 0.52536300  |
| C                                  | -2.44517200 | 0.78795200  | 1.18494900  |
| C                                  | -1.77516100 | -0.36169600 | 1.69995600  |
| C                                  | -2.11004700 | -1.53069200 | 0.93876900  |
| C                                  | -2.98538000 | -1.24799700 | -0.12784900 |
| P                                  | -3.51466600 | 0.45791400  | -0.20718400 |
| H                                  | -1.12946600 | -0.36233500 | 2.57333900  |
| H                                  | -2.30329500 | 1.78246200  | 1.59993400  |
| H                                  | -3.27223400 | -2.00218100 | -0.85737800 |
| H                                  | -1.66600800 | -2.50748300 | 1.11616000  |
| Mn                                 | 1.01206300  | 0.05080500  | -0.02237200 |
| Mn                                 | -1.13807600 | -0.00772000 | -0.30362400 |
| C                                  | 0.42723000  | -1.38324600 | -0.96515300 |
| C                                  | -0.42132200 | 1.62983800  | -0.64983300 |
| O                                  | 0.40957600  | -2.38735100 | -1.58174600 |
| O                                  | -0.28529800 | 2.77437700  | -0.88034400 |
| <b>2S-2 (C<sub>1</sub>) / BP86</b> |             |             |             |
| C                                  | 2.94364900  | -0.57598700 | -0.77914500 |
| C                                  | 2.80674700  | 0.82683900  | -1.00180200 |
| C                                  | 2.55862200  | 1.54169300  | 0.22005800  |
| C                                  | 2.54284900  | 0.67119500  | 1.35687900  |
| P                                  | 2.84888200  | -1.05448700 | 0.96361000  |
| H                                  | 2.79653200  | 1.29825400  | -1.99093100 |
| H                                  | 3.06915000  | -1.30413400 | -1.58694400 |
| H                                  | 2.30501400  | 1.02631800  | 2.36621200  |
| H                                  | 2.35167500  | 2.61629700  | 0.26081800  |
| C                                  | -2.50547200 | 0.82115200  | 1.15993300  |
| C                                  | -1.93961600 | -0.36564000 | 1.73763300  |
| C                                  | -2.18542200 | -1.51433200 | 0.90582500  |
| C                                  | -2.93135000 | -1.19037800 | -0.26639100 |
| P                                  | -3.40375700 | 0.53438000  | -0.37424200 |
| H                                  | -1.37370300 | -0.39366100 | 2.67391900  |
| H                                  | -2.39121600 | 1.81564100  | 1.60377500  |
| H                                  | -3.13920600 | -1.92715800 | -1.05015900 |
| H                                  | -1.77675300 | -2.50975400 | 1.11257000  |
| Mn                                 | 1.00665000  | 0.07420900  | -0.02603100 |
| Mn                                 | -1.05358800 | -0.01598500 | -0.16685400 |
| C                                  | 0.23712300  | -1.37422500 | -0.93266900 |

|   |             |             |             |
|---|-------------|-------------|-------------|
| C | -0.29483300 | 1.62137100  | -0.55822000 |
| O | 0.26536500  | -2.42208700 | -1.51071700 |
| O | -0.23270200 | 2.79134900  | -0.79681600 |
